# Supplementary material for: Characterization of Ginsenosides from the Root of Panax ginseng by Integrating Untargeted Metabolites Using UPLC-Triple TOF-MS
Source: MDPI journal article supplement (doi:10.3390/molecules28052068), 2023-02-22
Supplement: s1 [file s1]

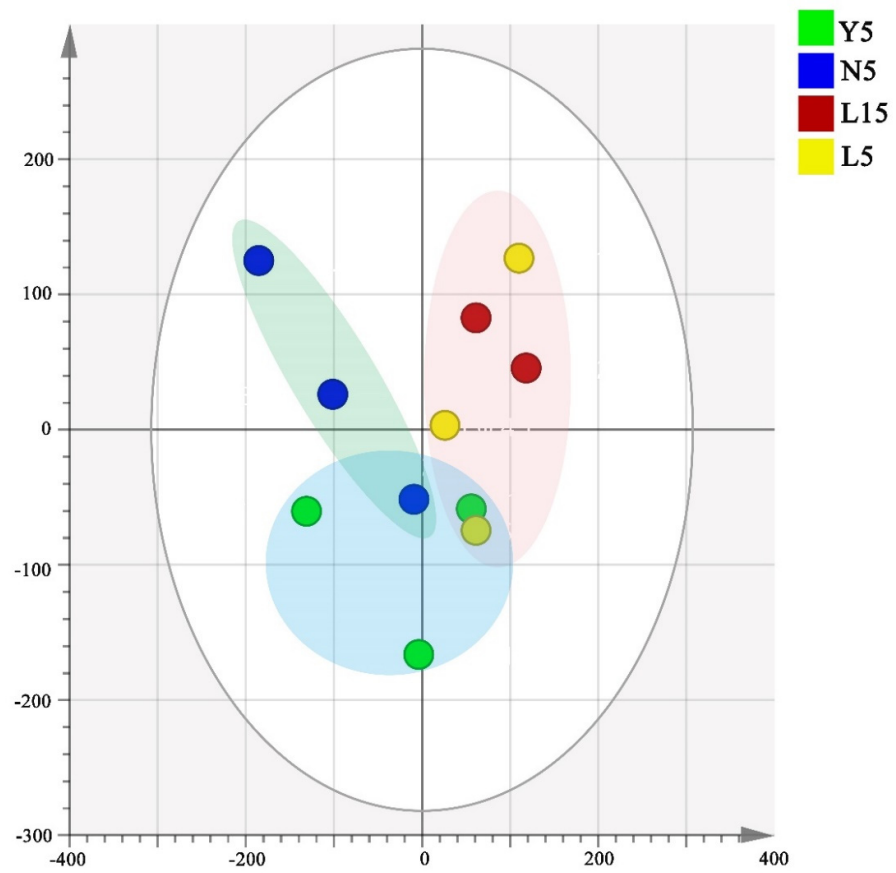

Figure S1: The PCA analysis for the four groups of samples.

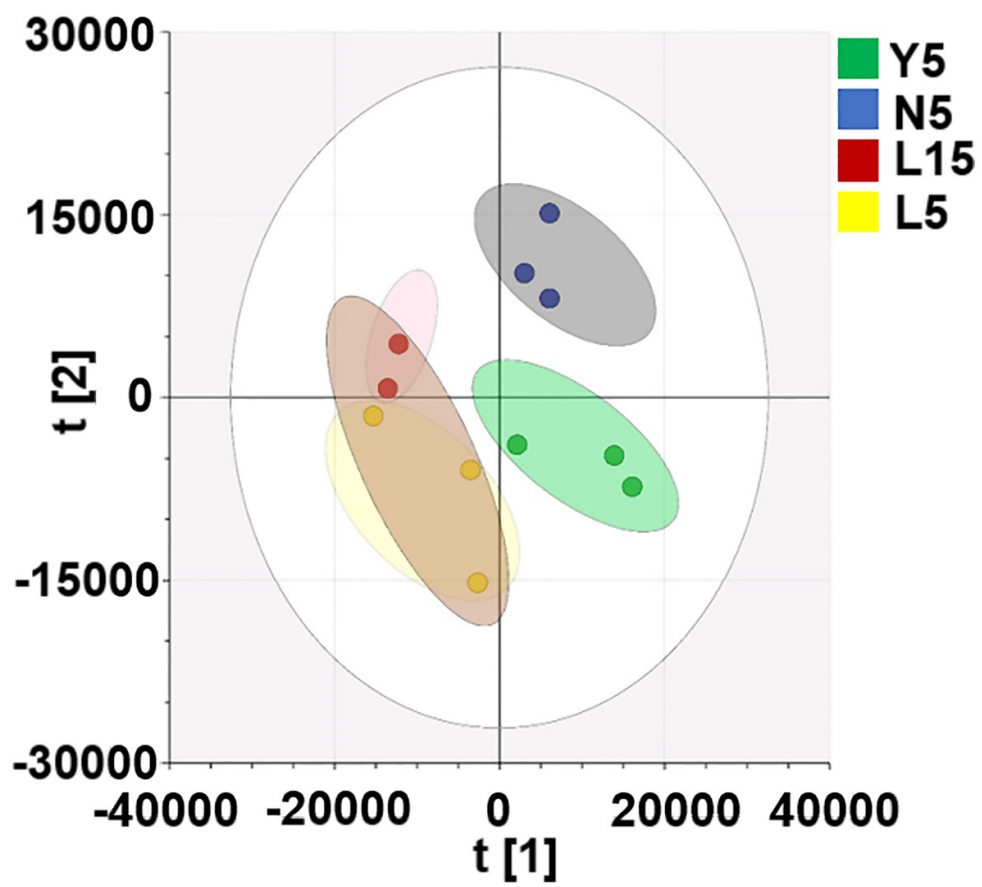

Figure S2: The OPLS-DA analysis for the four groups of samples.

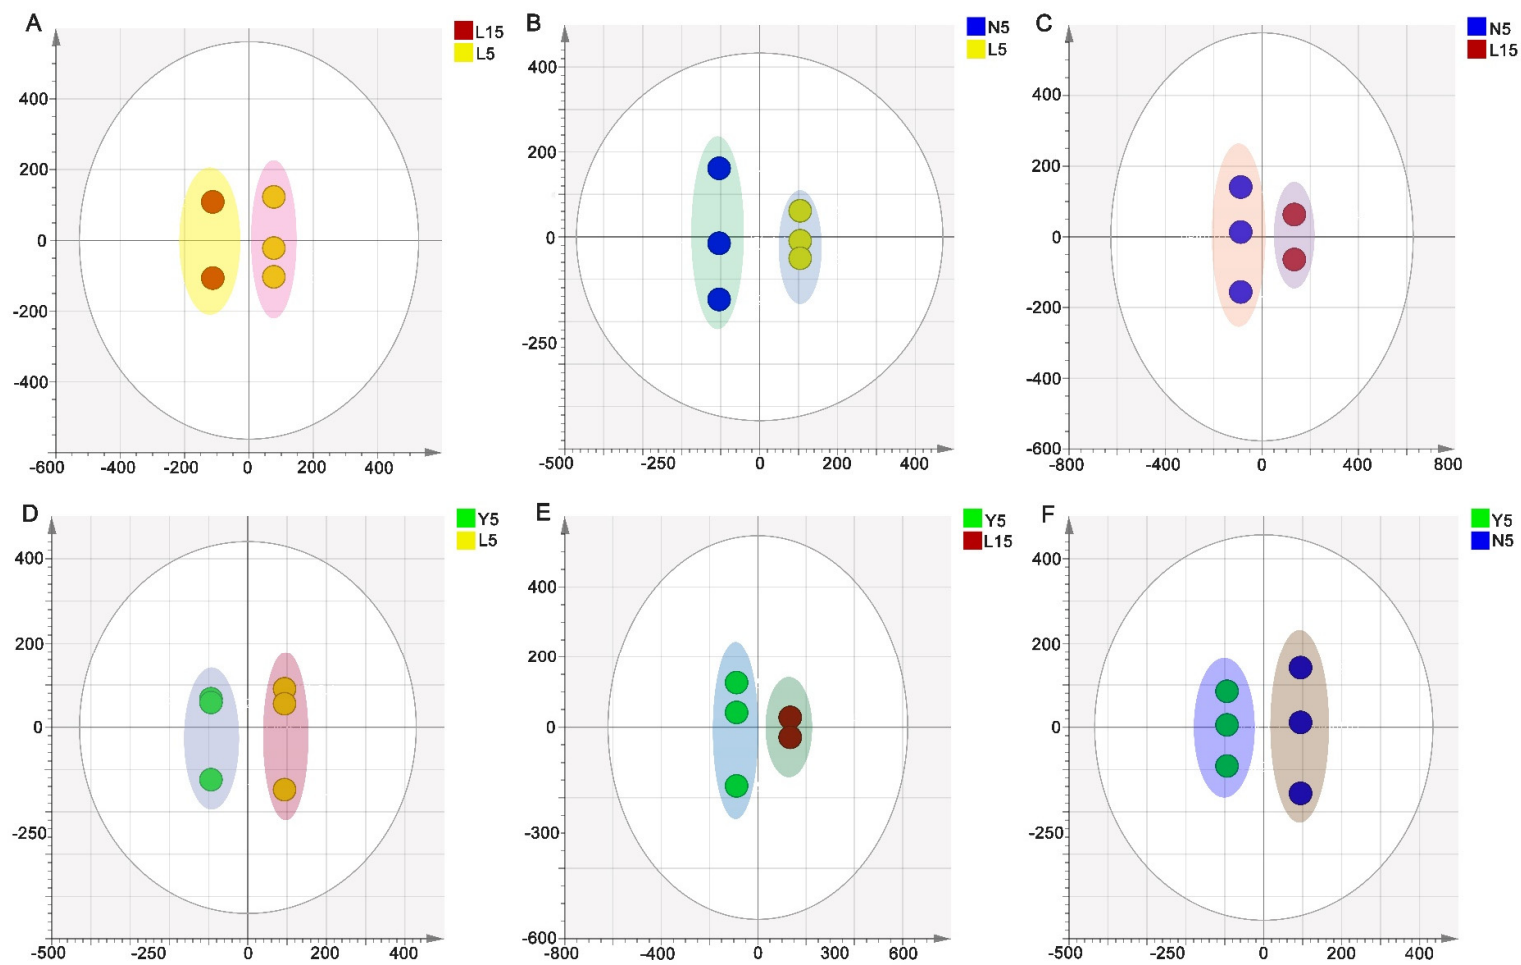

Figure S3: The OPLS-DA analysis for the pairwise comparison of the four groups of samples.

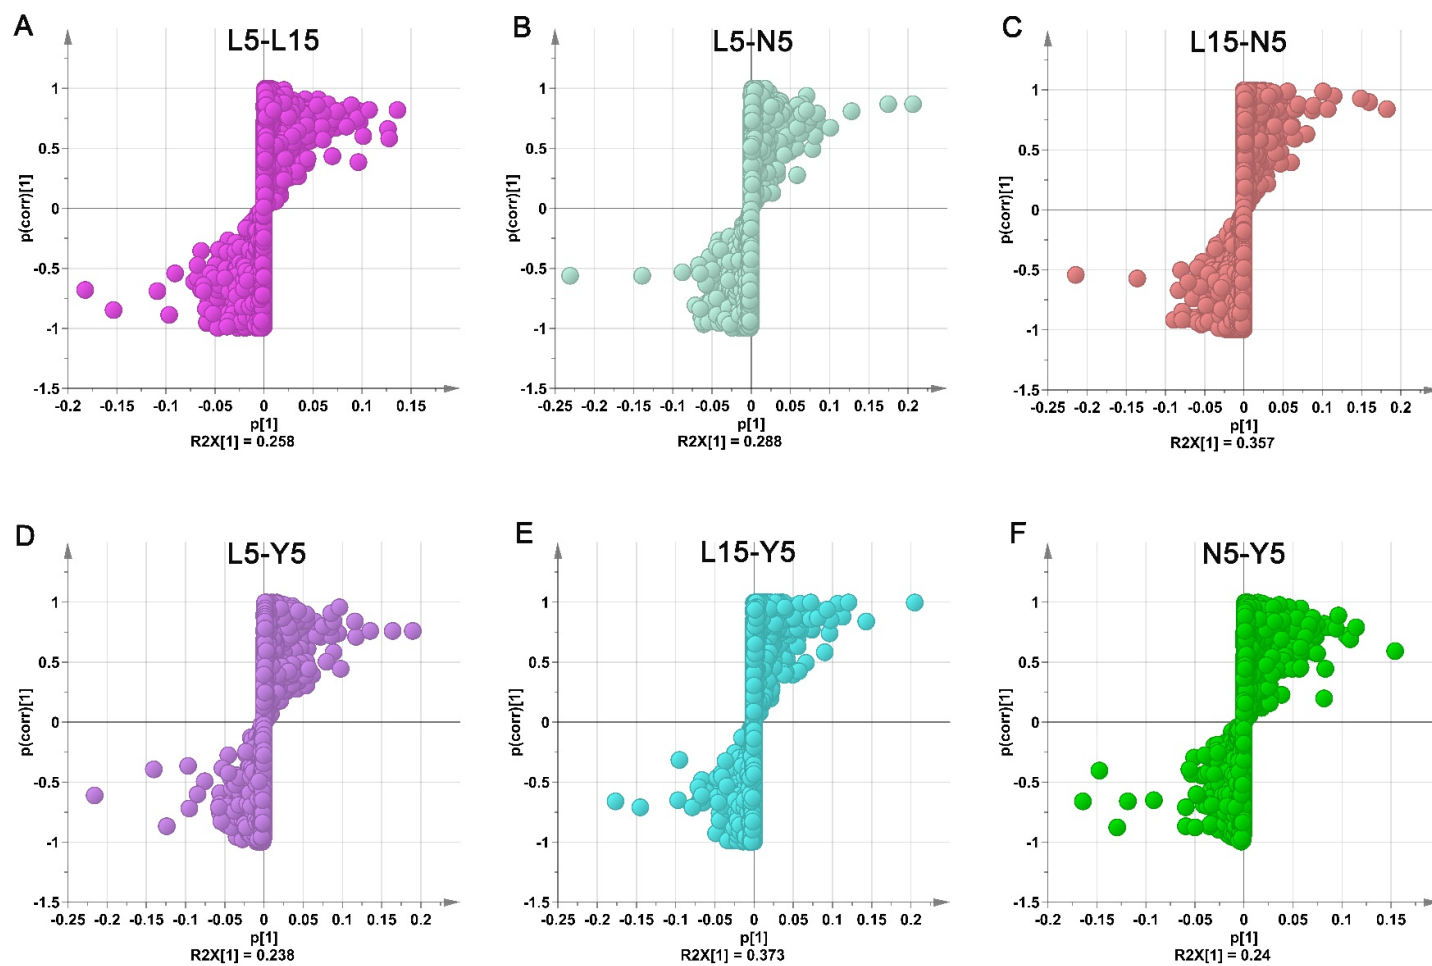

Figure S4: The S-Plot analysis for the pairwise comparison of the four groups of sample.

**Table S1** MS and MS/MS of the 237 known ginsenosides

| Retention Time | Found at Mass | MS/MS                                                                                                                                                                                                                                                                   | Name                                         | Formula                                         | Theoretical Mass (Da) | Sources          | Error (ppm) |
|----------------|---------------|-------------------------------------------------------------------------------------------------------------------------------------------------------------------------------------------------------------------------------------------------------------------------|----------------------------------------------|-------------------------------------------------|-----------------------|------------------|-------------|
| 1.18           | 861.4858      | 861.4879[M+FA-H] <sup>-</sup> 815.4800[M-H] <sup>-</sup> 653.4251[M-H-Glc] <sup>-</sup><br>635.4230[M-H-Glc-H <sub>2</sub> O] <sup>-</sup> 491.3715[M-H-2Glc] <sup>-</sup>                                                                                              | Panajaponol A/isomer                         | C <sub>42</sub> H <sub>72</sub> O <sub>15</sub> | 816.4871              | L5、L15、<br>Y5、N5 | -0.86       |
| 1.25           | 863.5005      | 863.5007[M+FA-H] <sup>-</sup> 817.4953[M-H] <sup>-</sup> 655.4458[M-H-Glc] <sup>-</sup><br>493.3921[M-H-2Glc] <sup>-</sup>                                                                                                                                              | 20-S-Rf <sub>3</sub> / isomer                | C <sub>42</sub> H <sub>74</sub> O <sub>15</sub> | 818.5028              | L5、L15、<br>Y5、N5 | -0.37       |
| 1.37           | 1003.5493     | 1003.5530[M-H] <sup>-</sup> 961.5460[M-H-Ac] <sup>-</sup> 943.5340[M-H-Ac-H <sub>2</sub> O] <sup>-</sup><br>799.4966[M-H-Ac-Glc] <sup>-</sup> 637.4406[M-H-Ac-Glc-Glc] <sup>-</sup><br>475.3464[M-H-Ac-Glc-Glc-Glc] <sup>-</sup>                                        | 6-acetyl ginsenoside-Rg <sub>3</sub> /isomer | C <sub>50</sub> H <sub>84</sub> O <sub>20</sub> | 1004.5556             | L5、L15、<br>Y5、N5 | -1.49       |
| 1.62           | 841.4954      | 841.4990[M-H] <sup>-</sup> 799.4915[M-H-Ac] <sup>-</sup> 781.4738[M-H-Ac-H <sub>2</sub> O] <sup>-</sup><br>679.4414[M-H-Glc] <sup>-</sup> 637.4319[M-H-Ac-Glc] <sup>-</sup> 619.4212[M-H-Ac-Glc-H <sub>2</sub> O] <sup>-</sup><br>475.3776[M-H-Ac-Glc-Glc] <sup>-</sup> | noto-Rt/isomer                               | C <sub>44</sub> H <sub>74</sub> O <sub>15</sub> | 842.5028              | L5、L15、<br>Y5、N5 | -0.48       |
| 1.62           | 827.4795      | 827.4811[M+FA-H] <sup>-</sup> 781.4744[M-H] <sup>-</sup> 619.4250[M-H-Glc] <sup>-</sup>                                                                                                                                                                                 | G-Rh <sub>15</sub> /isomer                   | C <sub>42</sub> H <sub>70</sub> O <sub>13</sub> | 782.4816              | L5、L15、<br>Y5、N5 | -0.77       |
| 1.63           | 987.5533      | 987.5576[M-H] <sup>-</sup> 945.5478[M-H-Ac] <sup>-</sup> 927.5359[M-H-Ac-H <sub>2</sub> O] <sup>-</sup><br>799.4704[M-H-Ac-Rha] <sup>-</sup> 637.4245[M-H-Ac-Rha-Glc] <sup>-</sup><br>475.3881[M-H-Ac-Rha-Glc-Glc] <sup>-</sup>                                         | Pseudoginsenoside Rs <sub>1</sub> /isomer    | C <sub>50</sub> H <sub>84</sub> O <sub>19</sub> | 988.5607              | L5、L15、<br>Y5、N5 | -0.41       |

|      |           |                                                                                                                                                                                                                                                                                                                                                                                                                  |                              |                                                 |           |              |       |
|------|-----------|------------------------------------------------------------------------------------------------------------------------------------------------------------------------------------------------------------------------------------------------------------------------------------------------------------------------------------------------------------------------------------------------------------------|------------------------------|-------------------------------------------------|-----------|--------------|-------|
| 1.79 | 1031.544  | 1031.5449[M-H] <sup>-</sup> 987.5586[M-H-CO <sub>2</sub> ] <sup>-</sup> 945.5471[M-H-CO <sub>2</sub> -Ac] <sup>-</sup> 927.5362[M-H-CO <sub>2</sub> -Ac-H <sub>2</sub> O] <sup>-</sup> 799.4916[M-H-CO <sub>2</sub> -Ac-Rha] <sup>-</sup> 637.4381[M-H-CO <sub>2</sub> -Ac-Rha-Glc] <sup>-</sup> 475.3786[M-H-CO <sub>2</sub> -Ac-Rha-1Glc] <sup>-</sup>                                                         | mRd isomer                   | C <sub>51</sub> H <sub>84</sub> O <sub>21</sub> | 1032.5505 | L5、L15、Y5、N5 | -1.26 |
| 1.87 | 861.4859  | 861.4826[M+FA-H] <sup>-</sup> 815.4788[M-H] <sup>-</sup> 653.4314[M-H-Glc] <sup>-</sup> 491.3729[M-H-2Glc] <sup>-</sup>                                                                                                                                                                                                                                                                                          | Panajaponol A/isomer         | C <sub>42</sub> H <sub>72</sub> O <sub>15</sub> | 816.4871  | L5、L15、Y5    | 0.61  |
| 1.89 | 885.4879  | 885.4878[M-H] <sup>-</sup> 841.4982[M-H-CO <sub>2</sub> ] <sup>-</sup> 799.4874[M-H-CO <sub>2</sub> -Ac] <sup>-</sup> 781.4768[M-H-CO <sub>2</sub> -Ac-H <sub>2</sub> O] <sup>-</sup> 679.4427[M-H-CO <sub>2</sub> -Glc] <sup>-</sup> 637.4336[M-H-CO <sub>2</sub> -Ac-Glc] <sup>-</sup> 619.4224[M-H-CO <sub>2</sub> -Ac-Glc-H <sub>2</sub> O] <sup>-</sup> 475.3784[M-H-CO <sub>2</sub> -Ac-2Glc] <sup>-</sup> | mRg <sub>1</sub> isomer      | C <sub>45</sub> H <sub>74</sub> O <sub>17</sub> | 886.4926  | L5、L15、Y5、N5 | -3.50 |
| 1.93 | 1123.5858 | 1123.5959[M-H] <sup>-</sup> 961.5497[M-H-Glc] <sup>-</sup> 799.4793[M-H-2Glc] <sup>-</sup> 637.4076[M-H-3Glc] <sup>-</sup> 475.3864[M-H-4Glc] <sup>-</sup>                                                                                                                                                                                                                                                       | Notoginsenoside Fh7 isomer   | C <sub>54</sub> H <sub>92</sub> O <sub>24</sub> | 1124.5979 | L5、L15       | 3.83  |
| 1.95 | 799.4848  | 799.4875[M-H] <sup>-</sup> 637.4325[M-H-Glc] <sup>-</sup> 475.3799[M-H-2Glc] <sup>-</sup>                                                                                                                                                                                                                                                                                                                        | Rg <sub>1</sub> isomer       | C <sub>42</sub> H <sub>72</sub> O <sub>14</sub> | 800.4922  | L5、L15、Y5、N5 | -0.50 |
| 1.96 | 945.5399  | 945.5496[M-H] <sup>-</sup> 799.4873[M-H-Rha] <sup>-</sup> 637.4582[M-H-Glc] <sup>-</sup> 475.3807[M-H-Rha-Glc-Glc] <sup>-</sup>                                                                                                                                                                                                                                                                                  | G-Re isomer                  | C <sub>48</sub> H <sub>82</sub> O <sub>18</sub> | 946.5501  | L5、L15、Y5、N5 | 2.54  |
| 2.21 | 885.4873  | 885.4875[M-H] <sup>-</sup> 841.4975[M-H-CO <sub>2</sub> ] <sup>-</sup> 799.4869[M-H-CO <sub>2</sub> -Ac] <sup>-</sup> 637.4317[M-H-CO <sub>2</sub> -Ac-Glc] <sup>-</sup> 475.3839[M-H-CO <sub>2</sub> -Ac-2Glc] <sup>-</sup>                                                                                                                                                                                     | mRg <sub>1</sub> isomer      | C <sub>45</sub> H <sub>74</sub> O <sub>17</sub> | 886.4926  | L5、L15、Y5、N5 | -2.82 |
| 2.21 | 841.498   | 841.4979[M-H] <sup>-</sup> 799.4859[M-H-Ac] <sup>-</sup> 637.4293[M-H-Ac-Glc] <sup>-</sup> 475.3849[M-H-Ac-2Glc] <sup>-</sup>                                                                                                                                                                                                                                                                                    | noto-Rt/isomer               | C <sub>44</sub> H <sub>74</sub> O <sub>15</sub> | 842.5028  | L5、L15、Y5、N5 | -3.57 |
| 2.25 | 987.5548  | 987.5547[M-H] <sup>-</sup> 945.5413[M-H-Ac] <sup>-</sup> 927.5322[M-H-Ac-H <sub>2</sub> O] <sup>-</sup> 799.4837[M-H-Ac-Rha] <sup>-</sup> 783.4981[M-H-Ac-Glc] <sup>-</sup> 781.4879[M-H-Ac-Rha-H <sub>2</sub> O] <sup>-</sup> 637.4303[M-H-Ac-Glc-Rha] <sup>-</sup> 475.3716[M-H-Ac-Glc-Rha-Glc] <sup>-</sup>                                                                                                   | Pseudoginsenoside Rs1/isomer | C <sub>50</sub> H <sub>84</sub> O <sub>19</sub> | 988.5607  | L5、L15、Y5、N5 | -1.92 |

|      |           |                                                                                                                                                                                                                                                                                                                   |                                       |                                                 |           |                  |       |
|------|-----------|-------------------------------------------------------------------------------------------------------------------------------------------------------------------------------------------------------------------------------------------------------------------------------------------------------------------|---------------------------------------|-------------------------------------------------|-----------|------------------|-------|
| 2.34 | 827.4815  | 827.4824[M+FA-H] <sup>-</sup> 781.4755[M-H] <sup>-</sup> 619.4175[M-H-Glc] <sup>-</sup><br>457.3386[M-H-2Glc] <sup>-</sup>                                                                                                                                                                                        | G-Rh <sub>15</sub> /isomer            | C <sub>42</sub> H <sub>70</sub> O <sub>13</sub> | 782.4816  | L5、L15、<br>Y5、N5 | -2.18 |
| 2.72 | 799.4849  | 799.4803[M-H] <sup>-</sup> 637.4140[M-H-Glc] <sup>-</sup> 475.3608[M-H-Glc-<br>Glc] <sup>-</sup>                                                                                                                                                                                                                  | Rg <sub>1</sub> isomer                | C <sub>42</sub> H <sub>72</sub> O <sub>14</sub> | 800.4922  | L5、L15、<br>Y5、N5 | -0.63 |
| 2.74 | 885.4877  | 885.4880[M-H] <sup>-</sup> 841.4993[M-H-CO <sub>2</sub> ] <sup>-</sup> 799.4819[M-H-CO <sub>2</sub> -<br>Ac] <sup>-</sup> 637.4325[M-H-CO <sub>2</sub> -Ac-Glc] <sup>-</sup> 619.4209[M-H-CO <sub>2</sub> -Ac-<br>Glc-H <sub>2</sub> O] <sup>-</sup> 475.3920[M-H-CO <sub>2</sub> -Ac-2Glc] <sup>-</sup>          | mRg <sub>1</sub> isomer               | C <sub>45</sub> H <sub>74</sub> O <sub>17</sub> | 886.4926  | L5、L15、<br>Y5、N5 | -3.28 |
| 2.77 | 841.4953  | 841.5016[M-H] <sup>-</sup> 799.4834[M-H-Ac] <sup>-</sup> 781.4688[M-H-Ac-H <sub>2</sub> O] <sup>-</sup><br>637.4381[M-H-Ac-Glc] <sup>-</sup> 619.4221[M-H-Ac-Glc-H <sub>2</sub> O] <sup>-</sup><br>475.3735[M-H-Ac-2Glc] <sup>-</sup>                                                                             | noto-Rt/isomer                        | C <sub>44</sub> H <sub>74</sub> O <sub>15</sub> | 842.5028  | L5、L15、<br>Y5、N5 | -0.36 |
| 2.82 | 863.4998  | 863.4849[M+FA-H] <sup>-</sup> 817.4966[M-H] <sup>-</sup> 655.4481[M-H-Glc] <sup>-</sup><br>493.3895[M-H-2Glc] <sup>-</sup>                                                                                                                                                                                        | 20-S-Rf <sub>3</sub> / isomer         | C <sub>42</sub> H <sub>74</sub> O <sub>15</sub> | 818.5028  | L5、L15、<br>Y5、N5 | -1.96 |
| 2.83 | 987.5541  | 987.5572[M-H] <sup>-</sup> 945.5459[M-H-Ac] <sup>-</sup> 927.5299[M-H-Ac-H <sub>2</sub> O] <sup>-</sup><br>799.4982[M-H-Ac-Rha] <sup>-</sup> 781.4555[M-H-Ac-Rha-H <sub>2</sub> O] <sup>-</sup><br>637.4408[M-H-Ac-Rha-Glc] <sup>-</sup> 475.3925[M-H-Ac-Rha-Glc] <sup>-</sup>                                    | 20-S-Rf <sub>3</sub> / isomer         | C <sub>50</sub> H <sub>84</sub> O <sub>19</sub> | 988.5607  | L5、L15、<br>Y5、N5 | -1.22 |
| 2.87 | 1031.5437 | 1031.5450[M-H] <sup>-</sup> 987.5545[M-H-CO <sub>2</sub> ] <sup>-</sup> 927.5376[M-H-CO <sub>2</sub> -<br>Ac-H <sub>2</sub> O] <sup>-</sup> 799.4965[M-H-CO <sub>2</sub> -Ac-Rha] <sup>-</sup> 637.4275[M-H-CO <sub>2</sub> -<br>Ac-Rha-Glc] <sup>-</sup> 475.3859[M-H-CO <sub>2</sub> -Ac-Rha-2Glc] <sup>-</sup> | mRd isomer                            | C <sub>51</sub> H <sub>84</sub> O <sub>21</sub> | 1032.5505 | L5、Y5、<br>N5     | -0.97 |
| 3    | 861.4824  | 815.4809[M-H] <sup>-</sup> 653.4293[M-H-Glc] <sup>-</sup> 635.4135[M-H-Glc-<br>H <sub>2</sub> O] <sup>-</sup> 491.3729[M-H-2Glc] <sup>-</sup>                                                                                                                                                                     | Panajaponol A/isomer                  | C <sub>42</sub> H <sub>72</sub> O <sub>15</sub> | 816.4871  | L5、L15、<br>Y5、N5 | -1.96 |
| 3.2  | 961.5397  | 961.5397[M-H] <sup>-</sup> 799.4887[M-H-Glc] <sup>-</sup> 637.4224[M-H-2Glc] <sup>-</sup><br>475.3553[M-H-3Glc] <sup>-</sup>                                                                                                                                                                                      | Re <sub>1</sub> isomer                | C <sub>48</sub> H <sub>82</sub> O <sub>19</sub> | 962.545   | L5、L15、<br>Y5、N5 | -2.60 |
| 3.3  | 947.52    | 947.5208[M-H] <sup>-</sup> 815.4781[M-H-Xyl/Ara] <sup>-</sup> 653.4309[M-H-<br>Xyl/Ara-Glc] <sup>-</sup> 491.3935[M-H-Xyl/Ara-2Glc] <sup>-</sup>                                                                                                                                                                  | Vinaginsenoside R <sub>6</sub> isomer | C <sub>47</sub> H <sub>80</sub> O <sub>19</sub> | 948.5294  | L15              | 1.69  |
| 3.35 | 817.498   | 817.4980[M-H] <sup>-</sup> 655.4273[M-H-Glc] <sup>-</sup> 493.3653[M-H-2Glc] <sup>-</sup>                                                                                                                                                                                                                         | 20(S)- Rf <sub>3</sub> isomer         | C <sub>42</sub> H <sub>74</sub> O <sub>15</sub> | 818.5028  | L15、Y5、<br>N5    | -3.67 |

|      |           |                                |                                    |                                                                      |                                                                                                           |                                                 |           |                  |       |
|------|-----------|--------------------------------|------------------------------------|----------------------------------------------------------------------|-----------------------------------------------------------------------------------------------------------|-------------------------------------------------|-----------|------------------|-------|
| 3.38 | 815.4816  | 815.4802[M-H] <sup>-</sup>     | 653.4259[M-H-Glc] <sup>-</sup>     | 491.3736[M-H-2Glc]<br>391.2856                                       | Panajaponol A/isomer                                                                                      | C <sub>42</sub> H <sub>72</sub> O <sub>15</sub> | 816.4871  | L5、L15、<br>Y5、N5 | -2.82 |
| 3.67 | 1123.5924 | 1123.5951[M-H] <sup>-</sup>    | 961.5277[M-H-Glc] <sup>-</sup>     | 799.4742[M-H-2Glc] <sup>-</sup><br>637.4282[M-H-3Glc] <sup>-</sup>   | Notoginsenoside Fh7<br>isomer                                                                             | C <sub>54</sub> H <sub>92</sub> O <sub>24</sub> | 1124.5979 | L5、L15、<br>Y5、N5 | -2.05 |
| 3.68 | 961.5383  |                                | 961.5401[M-H] <sup>-</sup>         | 799.4852[M-H-Glc] <sup>-</sup>                                       | G-Re <sub>3</sub>                                                                                         | C <sub>48</sub> H <sub>82</sub> O <sub>19</sub> | 962.545   | L5、L15、<br>Y5、N5 | -1.14 |
| 3.82 | 831.4767  | 831.4831[M+FA-H] <sup>-</sup>  | 785.4672[M-H] <sup>-</sup>         | 653.4260[M-H-<br>Xyl/Ara] <sup>-</sup>                               | M-R <sub>2</sub> /isomer                                                                                  | C <sub>41</sub> H <sub>70</sub> O <sub>14</sub> | 786.4766  | L15、Y5、<br>N5    | 2.04  |
| 3.97 | 1093.5796 | 1093.5849[M-H] <sup>-</sup>    | 961.5383[M-H-Xyl/Ara] <sup>-</sup> | 799.5146[M-H-<br>Xyl/Ara-Glc] <sup>-</sup>                           | 20S-sanchirrhinosides A <sub>6</sub><br>isomer                                                            | C <sub>53</sub> H <sub>90</sub> O <sub>23</sub> | 1094.5873 | L15、Y5           | -0.09 |
| 4.15 | 787.4832  | 787.4909[M-H] <sup>-</sup>     | 655.4474[M-H-Xyl/Ara] <sup>-</sup> | 493.3920[M-H-<br>Xyl/Ara-Glc] <sup>-</sup>                           | 3β,12β,20,25-<br>tetrahydroxydammarane-<br>6-O-β-D-Xylopyranosyl-<br>(1→2)-β-D-<br>glucopyranoside isomer | C <sub>41</sub> H <sub>72</sub> O <sub>14</sub> | 788.4922  | L15              | 1.52  |
| 4.48 | 961.538   | 961.5409[M-H] <sup>-</sup>     | 799.4851[M-H-Glc] <sup>-</sup>     | 781.4779[M-H-Glc-<br>H <sub>2</sub> O] <sup>-</sup>                  | Re <sub>1</sub> isomer                                                                                    | C <sub>48</sub> H <sub>82</sub> O <sub>19</sub> | 962.545   | L5、L15、<br>Y5、N5 | -0.83 |
| 4.61 | 1007.5436 | 1007.5537[M+FA-H] <sup>-</sup> | 961.5420[M-H] <sup>-</sup>         | 799.4781[M-<br>H-Glc] <sup>-</sup>                                   | 20-glu-G-Rf                                                                                               | C <sub>48</sub> H <sub>82</sub> O <sub>19</sub> | 962.545   | L5、L15、<br>Y5、N5 | -4.99 |
| 4.64 | 931.5284  | 931.5332[M-H] <sup>-</sup>     | 799.4894[M-H-Ara(f)] <sup>-</sup>  | 637.4357[M-H-<br>Ara(f)-Glc] <sup>-</sup>                            | G-Re <sub>4</sub>                                                                                         | C <sub>47</sub> H <sub>80</sub> O <sub>18</sub> | 932.5345  | L5、L15、<br>Y5、N5 | -1.82 |
| 4.66 | 845.4894  | 845.5101[M+FA-H] <sup>-</sup>  | 799.4923[M-H] <sup>-</sup>         | 653.4353[M-H-Rha] <sup>-</sup><br>491.3664[M-H-Rha-Glc] <sup>-</sup> | PG-F <sub>11</sub> isomer                                                                                 | C <sub>42</sub> H <sub>72</sub> O <sub>14</sub> | 800.4922  | L5、L15、<br>Y5、N5 | -9.88 |

|      |           |                                                                                                                                                                                                                                                                 |                                             |                                                 |           |              |       |
|------|-----------|-----------------------------------------------------------------------------------------------------------------------------------------------------------------------------------------------------------------------------------------------------------------|---------------------------------------------|-------------------------------------------------|-----------|--------------|-------|
| 4.68 | 831.475   | 831.4847[M+FA-H] <sup>-</sup> 785.4700[M-H] <sup>-</sup> 653.4272[M-H-Ara/Xyl] <sup>-</sup> 635.4084[M-H-Ara/Xyl-H <sub>2</sub> O] <sup>-</sup> 491.3704[M-H-Ara/Xyl-Glc] <sup>-</sup>                                                                          | M-R <sub>2</sub> /isomer                    | C <sub>41</sub> H <sub>70</sub> O <sub>14</sub> | 786.4766  | L5、L15、Y5、N5 | -1.53 |
| 4.73 | 1007.5446 | 1007.5449[M+FA-H] <sup>-</sup> 961.5403[M-H] <sup>-</sup> 799.4850[M-H-Glc] <sup>-</sup> 637.4181[M-H-2Glc] <sup>-</sup>                                                                                                                                        | G-Re <sub>2</sub>                           | C <sub>48</sub> H <sub>82</sub> O <sub>19</sub> | 962.545   | L5、L15、Y5、N5 | -3.22 |
| 4.82 | 1077.5826 | 1077.5888[M-H] <sup>-</sup> 945.5443[M-H-Xyl/Ara] <sup>-</sup> 799.4837[M-H-Xyl/Ara-Rha] <sup>-</sup> 783.4936[M-H-Xyl/Ara-Glc] <sup>-</sup> 637.4249[M-H-Rha-Xyl/Ara-Glc] <sup>-</sup> 475.3740[M-H-Rha-Xyl/Ara-2Glc] <sup>-</sup>                             | Floralginsenoside M isomer                  | C <sub>53</sub> H <sub>90</sub> O <sub>22</sub> | 1078.5924 | L5、L15、Y5、N5 | 1.86  |
| 4.85 | 1093.5789 | 1093.5856[M-H] <sup>-</sup> 931.5350[M-H-Glc] <sup>-</sup> 799.4631[M-H-Glc-Xyl/Ara] <sup>-</sup> 637.4243[M-H-Xyl/Ara-2Glc] <sup>-</sup> 475.3803[M-H-3Glc-Xyl/Ara] <sup>-</sup>                                                                               | 20S-sanchirrhinosides A <sub>6</sub> isomer | C <sub>53</sub> H <sub>90</sub> O <sub>23</sub> | 1094.5873 | L5、L15、Y5    | 0.55  |
| 4.9  | 883.5063  | 883.5079[M-H] <sup>-</sup> 841.4887[M-H-Ac] <sup>-</sup> 799.4767[M-H-2Ac] <sup>-</sup> 781.4664[M-H-2Ac-H <sub>2</sub> O] <sup>-</sup> 763.4465[M-H-2Ac-2H <sub>2</sub> O] <sup>-</sup> 637.4242[M-H-2Ac-Glc] <sup>-</sup> 475.3739[M-H-2Ac-2Glc] <sup>-</sup> | 6',6"-di-O-acetyl Rg <sub>1</sub> isomer    | C <sub>46</sub> H <sub>76</sub> O <sub>16</sub> | 884.5133  | L5、L15、Y5、N5 | -0.91 |
| 4.91 | 861.4853  | 861.4935[M+FA-H] <sup>-</sup> 815.4784[M-H] <sup>-</sup> 653.4239[M-H-Glc] <sup>-</sup> 635.4399[M-H-Glc-H <sub>2</sub> O] <sup>-</sup> 491.3707[M-H-2Glc] <sup>-</sup>                                                                                         | Panajaponol A/isomer                        | C <sub>42</sub> H <sub>72</sub> O <sub>15</sub> | 816.4871  | L5、L15、Y5、N5 | 1.10  |
| 5.04 | 653.4263  | 653.4280[M-H] <sup>-</sup> 491.3788[M-Glc] <sup>-</sup>                                                                                                                                                                                                         | PG-RT <sub>5</sub> isomer                   | C <sub>36</sub> H <sub>62</sub> O <sub>10</sub> | 654.4343  | L5、L15、Y5、N5 | 0.31  |
| 5.19 | 1107.5973 | 1107.5999[M-H] <sup>-</sup> 961.5520[M-H-Rha] <sup>-</sup> 945.5238[M-H-Glc] <sup>-</sup> 927.4901[M-H-Glc-H <sub>2</sub> O] <sup>-</sup> 783.5103[M-H-2Glc] <sup>-</sup> 637.4377[M-H-2Glc-Rha] <sup>-</sup> 475.3802[M-H-3Glc-Rha] <sup>-</sup>               | Yesanchinoside E/isomer                     | C <sub>54</sub> H <sub>92</sub> O <sub>23</sub> | 1108.6029 | L5           | -1.99 |
| 5.19 | 931.5284  | 977.5361[M+HCOO] <sup>-</sup> 931.5323[M-H] <sup>-</sup> 799.4895[M-H-Xyl] <sup>-</sup> 637.4340[M-H-Xyl-Glc] <sup>-</sup>                                                                                                                                      | NG-R <sub>1</sub>                           | C <sub>47</sub> H <sub>80</sub> O <sub>18</sub> | 932.5345  | L5、L15、Y5、N5 | -1.82 |
| 5.22 | 1077.586  | 1077.5891[M-H] <sup>-</sup> 945.5427[M-H-Ara/Xyl] <sup>-</sup> 931.5314[M-H-Rha] <sup>-</sup> 799.5007[M-H-Rha-Ara/Xyl] <sup>-</sup> 637.4326[M-H-Rha-Xyl/Ara-Glc] <sup>-</sup> 475.3805[M-H-Rha-Xyl/Ara-2Glc] <sup>-</sup>                                     | Floralginsenoside M isomer                  | C <sub>53</sub> H <sub>90</sub> O <sub>22</sub> | 1078.5924 | L5、L15、Y5、N5 | -1.30 |

|      |           |                                                                                                                                                                                                                                                                                                                                                                                                                                                                                                                              |                                              |                                                 |           |                  |       |
|------|-----------|------------------------------------------------------------------------------------------------------------------------------------------------------------------------------------------------------------------------------------------------------------------------------------------------------------------------------------------------------------------------------------------------------------------------------------------------------------------------------------------------------------------------------|----------------------------------------------|-------------------------------------------------|-----------|------------------|-------|
| 5.28 | 801.4938  | 801.4938[M-H] <sup>-</sup> 655.4284[M-H-Rha] <sup>-</sup> 493.3736[M-H-Rha-Glc] <sup>-</sup>                                                                                                                                                                                                                                                                                                                                                                                                                                 | 20(R)-G-Rf <sub>2</sub> isomer               | C <sub>42</sub> H <sub>74</sub> O <sub>14</sub> | 802.5079  | N5               | 7.86  |
| 5.3  | 799.4853  | 799.4887[M-H] <sup>-</sup> 653.4289[M-H-Rha] <sup>-</sup> 635.4220[M-H-Rha-H <sub>2</sub> O] <sup>-</sup> 491.3738[M-H-Rha-Glc] <sup>-</sup>                                                                                                                                                                                                                                                                                                                                                                                 | PG-F <sub>11</sub> isomer                    | C <sub>42</sub> H <sub>72</sub> O <sub>14</sub> | 800.4922  | L5、L15、<br>N5    | -1.13 |
| 5.34 | 961.5397  | 961.5439[M-H] <sup>-</sup> 799.4901[M-H-Glc] <sup>-</sup> 637.4361[M-H-2Glc] <sup>-</sup> 475.3979[M-H-3Glc] <sup>-</sup>                                                                                                                                                                                                                                                                                                                                                                                                    | G-Re <sub>1</sub>                            | C <sub>48</sub> H <sub>82</sub> O <sub>19</sub> | 962.545   | L5、L15、<br>Y5、N5 | -2.60 |
| 5.35 | 1003.5427 | 1003.5500[M-H] <sup>-</sup> 961.5477[M-H-Ac] <sup>-</sup> 799.4829[M-H-Ac-Glc] <sup>-</sup> 637.4480[M-H-Ac-Glc-Glc] <sup>-</sup> 475.3933[M-H-Ac-Glc-Glc-Glc] <sup>-</sup> 885.4974[M-H] <sup>-</sup> 841.4966[M-H-CO <sub>2</sub> ] <sup>-</sup> 799.4868[M-H-CO <sub>2</sub> -Ac] <sup>-</sup> 679.4388[M-H-CO <sub>2</sub> -Glc] <sup>-</sup> 637.4320[M-H-CO <sub>2</sub> -Ac-Glc] <sup>-</sup> 619.4206[M-H-CO <sub>2</sub> -Ac-Glc-H <sub>2</sub> O] <sup>-</sup> 475.3780[M-H-CO <sub>2</sub> -Ac-2Glc] <sup>-</sup> | 6-acetyl ginsenoside-Rg <sub>3</sub> /isomer | C <sub>50</sub> H <sub>84</sub> O <sub>20</sub> | 1004.5556 | L5、L15、<br>Y5、N5 | 5.08  |
| 5.44 | 885.482   | 885.482                                                                                                                                                                                                                                                                                                                                                                                                                                                                                                                      | mRg <sub>1</sub> isomer                      | C <sub>45</sub> H <sub>74</sub> O <sub>17</sub> | 886.4926  | L5、L15、<br>Y5、N5 | 3.16  |
| 5.46 | 861.4864  | 861.4869[M+FA-H] <sup>-</sup> 815.4838[M-H] <sup>-</sup> 653.4208[M-H-Glc] <sup>-</sup> 491.3700[M-H-2Glc] <sup>-</sup>                                                                                                                                                                                                                                                                                                                                                                                                      | Panajaponol A/isomer                         | C <sub>42</sub> H <sub>72</sub> O <sub>15</sub> | 816.4871  | L5、L15、<br>Y5、N5 | -5.52 |
| 5.47 | 841.497   | 841.4979[M-H] <sup>-</sup> 799.4883[M-H-Ac] <sup>-</sup> 679.4424[M-H-Glc] <sup>-</sup> 637.4333[M-H-Ac-Glc] <sup>-</sup> 619.4212[M-H-Ac-Glc-H <sub>2</sub> O] <sup>-</sup> 571.4000 475.3784[M-H-Ac-2Glc] <sup>-</sup>                                                                                                                                                                                                                                                                                                     | noto-Rt/isomer                               | C <sub>44</sub> H <sub>74</sub> O <sub>15</sub> | 842.5028  | L5、L15、<br>Y5、N5 | -2.38 |
| 5.54 | 931.5264  | 931.5268[M-H] <sup>-</sup> 799.4871[M-H-Xyl/Ara] <sup>-</sup> 637.4097[M-H-Xyl/Ara-Glc] <sup>-</sup> 637.4328[M-H-Xyl/Ara-Glc] <sup>-</sup> 475.3707 [M-H-Xyl/Ara-2Glc] <sup>-</sup>                                                                                                                                                                                                                                                                                                                                         | Re4 isomer/NG-R <sub>1</sub> isomer          | C <sub>47</sub> H <sub>80</sub> O <sub>18</sub> | 932.5345  | L5、L15、<br>Y5、N5 | 0.32  |
| 5.6  | 1107.5946 | 1107.5993[M-H] <sup>-</sup> 945.5454[M-H-Glc] <sup>-</sup> 799.4826[M-H-Glc-Rha] <sup>-</sup> 637.4536[M-H-Glc-Rha-Glc] <sup>-</sup> 475.3969[M-H-Glc-Glc-Glc-Rha] <sup>-</sup>                                                                                                                                                                                                                                                                                                                                              | Yesanchinoside E/isomer                      | C <sub>54</sub> H <sub>92</sub> O <sub>23</sub> | 1108.6029 | L5、L15、<br>N5    | 0.45  |
| 5.76 | 883.5036  | 883.5039[M-H] <sup>-</sup> 841.4901[M-H-Ac] <sup>-</sup> 799.4997[M-H-2Ac] <sup>-</sup> 637.4221[M-H-2Ac-Glc] <sup>-</sup> 475.3955[M-H-2Ac-2Glc] <sup>-</sup>                                                                                                                                                                                                                                                                                                                                                               | 6',6"-di-O-acetyl Rg <sub>1</sub> isomer     | C <sub>46</sub> H <sub>76</sub> O <sub>16</sub> | 884.5133  | L5、L15           | 2.15  |

|      |           |                               |                                                                    |                                                                                         |                                                                                                                                                         |                                                 |           |                  |       |
|------|-----------|-------------------------------|--------------------------------------------------------------------|-----------------------------------------------------------------------------------------|---------------------------------------------------------------------------------------------------------------------------------------------------------|-------------------------------------------------|-----------|------------------|-------|
| 5.77 | 845.493   | 845.4931[M+HCOO] <sup>-</sup> | 799.4878[M-H] <sup>-</sup>                                         | 637.4344[M-H-Glc] <sup>-</sup>                                                          | G-Rg <sub>1</sub>                                                                                                                                       | C <sub>42</sub> H <sub>72</sub> O <sub>14</sub> | 800.4922  | L5、L15、<br>Y5、N5 | -4.25 |
|      |           |                               | 475.3796[M-H-2Glc] <sup>-</sup>                                    |                                                                                         |                                                                                                                                                         |                                                 |           |                  |       |
| 5.81 | 991.5497  | 991.5509[M+HCOO] <sup>-</sup> | 945.5451[M-H] <sup>-</sup>                                         | 783.4931[M-H-Glc] <sup>-</sup>                                                          | G-Re                                                                                                                                                    | C <sub>48</sub> H <sub>82</sub> O <sub>18</sub> | 946.5501  | L5、L15、<br>Y5、N5 | -2.96 |
|      |           |                               | 637.4339[M-H-Glc-Rha] <sup>-</sup>                                 |                                                                                         |                                                                                                                                                         |                                                 |           |                  |       |
|      |           |                               |                                                                    |                                                                                         | β-D-Glucopyranoside, (3β,<br>6α,12β,20 <i>R</i> )-3,12,20-<br>trihydroxydammar-24-<br>en-6-yl 2- <i>O</i> -β-D-<br>Xylopyranosyl-, 6-<br>acetate isomer |                                                 |           |                  |       |
| 5.92 | 811.4851  | 811.4875[M-H] <sup>-</sup>    | 769.4769[M-H-C <sub>2</sub> H <sub>2</sub> O] <sup>-</sup>         | 637.4332[M-H-<br>C <sub>2</sub> H <sub>2</sub> O-Ara] <sup>-</sup>                      |                                                                                                                                                         | C <sub>43</sub> H <sub>72</sub> O <sub>14</sub> | 812.4922  | L5、L15、<br>Y5、N5 | -0.86 |
|      |           |                               | 475.3822[M-H-C <sub>2</sub> H <sub>2</sub> O-Ara-Glc] <sup>-</sup> | 457.3785[M-H-<br>C <sub>2</sub> H <sub>2</sub> O-Ara-Glc-H <sub>2</sub> O] <sup>-</sup> |                                                                                                                                                         |                                                 |           |                  |       |
| 6.03 | 841.4946  | 841.4992[M-H] <sup>-</sup>    | 799.4870[M-H-Ac] <sup>-</sup>                                      | 781.4783[M-H-Ac-H <sub>2</sub> O] <sup>-</sup>                                          | noto-Rt/isomer                                                                                                                                          | C <sub>44</sub> H <sub>74</sub> O <sub>15</sub> | 842.5028  | L5、L15、<br>Y5、N5 | 0.48  |
|      |           |                               | 637.4433[M-H-Ac-Glc] <sup>-</sup>                                  | 571.3910 475.3696[M-H-Ac-2Glc] <sup>-</sup>                                             |                                                                                                                                                         |                                                 |           |                  |       |
| 6.07 | 931.5273  | 931.5295[M-H] <sup>-</sup>    | 799.4904[M-H-Ara/Xyl] <sup>-</sup>                                 | 637.4383[M-H-<br>Ara/Xyl-Glc] <sup>-</sup>                                              | Re4 isomer/NG-R <sub>1</sub> isomer                                                                                                                     | C <sub>47</sub> H <sub>80</sub> O <sub>18</sub> | 932.5345  | L5、L15           | -0.64 |
|      |           |                               | 475.3807[M-H-Ara/Xyl-2Glc] <sup>-</sup>                            |                                                                                         |                                                                                                                                                         |                                                 |           |                  |       |
| 6.09 | 769.4723  | 769.4764[M-H] <sup>-</sup>    | 637.4358[M-H-Xyl/Ara] <sup>-</sup>                                 | 475.3834 [M-H-<br>Xyl/Ara-Glc] <sup>-</sup>                                             | F <sub>3</sub> isomer                                                                                                                                   | C <sub>41</sub> H <sub>70</sub> O <sub>13</sub> | 770.4816  | L15、Y5           | 1.95  |
|      |           |                               |                                                                    |                                                                                         |                                                                                                                                                         |                                                 |           |                  |       |
| 6.12 | 885.4868  | 885.4981[M-H] <sup>-</sup>    | 841.4957[M-H-CO <sub>2</sub> ] <sup>-</sup>                        | 799.4857[M-H-CO <sub>2</sub> -<br>Ac] <sup>-</sup>                                      | mRg <sub>1</sub> isomer                                                                                                                                 | C <sub>45</sub> H <sub>74</sub> O <sub>17</sub> | 886.4926  | L5、L15、<br>Y5    | -2.26 |
|      |           |                               | 781.4785[M-H-CO <sub>2</sub> -Ac-H <sub>2</sub> O] <sup>-</sup>    | 637.4350[M-H-CO <sub>2</sub> -Ac-<br>Glc] <sup>-</sup>                                  |                                                                                                                                                         |                                                 |           |                  |       |
|      |           |                               | 475.3668[M-H-CO <sub>2</sub> -Ac-2Glc] <sup>-</sup>                |                                                                                         |                                                                                                                                                         |                                                 |           |                  |       |
| 6.13 | 825.496   | 825.5019[M-H] <sup>-</sup>    | 783.4912[M-H-Ac] <sup>-</sup>                                      | 765.4817[M-H-Ac-H <sub>2</sub> O] <sup>-</sup>                                          | Rs <sub>3</sub> isomer                                                                                                                                  | C <sub>44</sub> H <sub>74</sub> O <sub>14</sub> | 826.5079  | L5、L15、<br>Y5、N5 | 4.97  |
|      |           |                               | 621.4336[M-H-Ac-Glc] <sup>-</sup>                                  | 459.3839[M-H-Ac-2Glc] <sup>-</sup>                                                      |                                                                                                                                                         |                                                 |           |                  |       |
| 6.14 | 1031.5427 | 1031.5427[M-H] <sup>-</sup>   | 989.5603[M-H-Ac] <sup>-</sup>                                      | 945.5464[M-H-Ac-<br>CO <sub>2</sub> ] <sup>-</sup>                                      | mRd isomer                                                                                                                                              | C <sub>51</sub> H <sub>84</sub> O <sub>21</sub> | 1032.5505 | L15、Y5           | 0.00  |
|      |           |                               | 799.4866[M-H-Ac-Rha] <sup>-</sup>                                  | 637.4181[M-H-Ac-Rha-Glc] <sup>-</sup>                                                   |                                                                                                                                                         |                                                 |           |                  |       |
|      |           |                               | 475.3799[M-H-Ac-CO <sub>2</sub> -Rha-2Glc] <sup>-</sup>            |                                                                                         |                                                                                                                                                         |                                                 |           |                  |       |
| 6.15 | 831.4744  | 831.4778[M+FA-H] <sup>-</sup> | 785.4726[M-H] <sup>-</sup>                                         | 653.4287[M-H-<br>Xyl/Ara] <sup>-</sup>                                                  | M-R <sub>2</sub> /isomer                                                                                                                                | C <sub>41</sub> H <sub>70</sub> O <sub>14</sub> | 786.4766  | L5、L15           | -4.84 |
|      |           |                               | 491.3841[M-H-Xyl/Ara-Glc] <sup>-</sup>                             |                                                                                         |                                                                                                                                                         |                                                 |           |                  |       |

|      |           |                                                                                                       |                                                                                                                               |                                                                                                                                  |                                                                                                                                                                    |                                                 |                                                 |                    |       |
|------|-----------|-------------------------------------------------------------------------------------------------------|-------------------------------------------------------------------------------------------------------------------------------|----------------------------------------------------------------------------------------------------------------------------------|--------------------------------------------------------------------------------------------------------------------------------------------------------------------|-------------------------------------------------|-------------------------------------------------|--------------------|-------|
| 6.16 | 969.5454  | 969.5454[M-H-H <sub>2</sub> O] <sup>-</sup><br>H-2H <sub>2</sub> O-Ac] <sup>-</sup>                   | 927.5341[M-H-H <sub>2</sub> O-Ac] <sup>-</sup><br>765.4705[M-H-H <sub>2</sub> O-Ac-Glc] <sup>-</sup><br>Ac-2Glc] <sup>-</sup> | 909.5226[M-H-<br>621.4331[M-H-Ac-3Glc] <sup>-</sup><br>459.3891[M-H-Ac-3Glc] <sup>-</sup>                                        | 6'''-O-acetylgypenoside<br>XVII isomer                                                                                                                             | C <sub>50</sub> H <sub>84</sub> O <sub>19</sub> | 988.5607                                        | L5、 L15、<br>Y5、 N5 | -3.14 |
| 6.18 | 1123.5938 | 1123.5953[M-H] <sup>-</sup><br>637.4347[M-H-3Glc] <sup>-</sup>                                        | 961.5364[M-H-Glc] <sup>-</sup><br>475.3801[M-H-4Glc] <sup>-</sup>                                                             | 799.4912[M-H-2Glc] <sup>-</sup>                                                                                                  | Notoginsenoside Fh <sub>7</sub><br>isomer                                                                                                                          | C <sub>54</sub> H <sub>92</sub> O <sub>24</sub> | 1124.5979                                       | L5、 L15、<br>Y5、 N5 | -3.29 |
| 6.19 | 825.4991  | 825.5018[M-H] <sup>-</sup><br>679.4401[M-H-Rha] <sup>-</sup><br>Ac-Rha-H <sub>2</sub> O] <sup>-</sup> | 783.495[M-H-Ac] <sup>-</sup><br>637.4332[M-H-Ac-Rha] <sup>-</sup><br>571.4032                                                 | 765.4748[M-H-Ac-H <sub>2</sub> O] <sup>-</sup><br>619.4226[M-H-Ac-Rha-Glc] <sup>-</sup><br>475.3756[M-H-Ac-Rha-Glc] <sup>-</sup> | β-D-Glucopyranoside, (3β,<br>6α,12β,20 <i>R</i> )-3,12,20-<br>trihydroxydammar-24-<br>en-6-yl 2- <i>O</i> -(6-deoxy-α-<br>L-mannopyranosyl)-, 6-<br>acetate isomer | C <sub>44</sub> H <sub>74</sub> O <sub>14</sub> | 826.5079                                        | L5、 L15、<br>N5     | 1.21  |
| 6.2  | 799.4847  | 799.4860[M-H] <sup>-</sup>                                                                            | 637.4330[M-H-Glc] <sup>-</sup>                                                                                                | 475.3830[M-H-2Glc] <sup>-</sup>                                                                                                  | Rg <sub>1</sub> isomer                                                                                                                                             | C <sub>42</sub> H <sub>72</sub> O <sub>14</sub> | 800.4922                                        | L5、 L15、<br>Y5     | -0.38 |
| 6.26 | 1029.5618 | 1029.5673[M-H] <sup>-</sup><br>783.5020[M-H-Ac-Ac-Glc] <sup>-</sup>                                   | 987.5567[M-H-Ac] <sup>-</sup><br>621.4281[M-H-Ac-Ac-2Glc] <sup>-</sup><br>459.3810[M-H-Ac-Ac-3Glc] <sup>-</sup>               | 945.5432[M-H-2Ac] <sup>-</sup>                                                                                                   | Diacetyl-G-Rd isomer                                                                                                                                               | C <sub>52</sub> H <sub>86</sub> O <sub>20</sub> | 1030.5712                                       | Y5                 | 1.55  |
| 6.29 | 679.4419  | 679.4447[M-H] <sup>-</sup>                                                                            | 637.4311[M-H-Ac] <sup>-</sup><br>475.3802[M-H-Ac-Glc] <sup>-</sup>                                                            | 619.4212[M-H-Ac-H <sub>2</sub> O] <sup>-</sup>                                                                                   | 20 <i>R</i> -ginsenoside Rh <sub>1</sub> 6'-<br>acetate isomer                                                                                                     | C <sub>38</sub> H <sub>64</sub> O <sub>10</sub> | 680.4499                                        | L15、 Y5、<br>N5     | 0.29  |
| 6.29 | 955.4992  | 957.5016[M-H] <sup>-</sup>                                                                            | 956.4995[M-H] <sup>-</sup>                                                                                                    | 794.4441[M-H-Glc] <sup>-</sup>                                                                                                   | G-Ro                                                                                                                                                               | C <sub>48</sub> H <sub>76</sub> O <sub>19</sub> | 956.4981                                        | L5、 L15、<br>Y5、 N5 | -9.30 |
| 6.37 | 845.4893  | 845.4843                                                                                              | 799.4884                                                                                                                      | 653.4308                                                                                                                         | 491.3699                                                                                                                                                           | PG-F <sub>11</sub> isomer                       | C <sub>42</sub> H <sub>72</sub> O <sub>14</sub> | L15、 N5            | -5.00 |
| 6.43 | 931.5232  | 931.5243[M-H] <sup>-</sup><br>Ara/Xyl-Glc] <sup>-</sup>                                               | 799.4716[M-H-Ara/Xyl] <sup>-</sup><br>475.3887[M-H-Ara/Xyl-2Glc] <sup>-</sup>                                                 | 637.4242[M-H-Ara/Xyl-2Glc] <sup>-</sup>                                                                                          | Re <sub>4</sub> isomer/NG-R <sub>1</sub> isomer                                                                                                                    | C <sub>47</sub> H <sub>80</sub> O <sub>18</sub> | 932.5345                                        | L5、 L15            | 3.76  |

|      |           |                                                                                                                    |                                                                                                                         |                                                                                                                                                             |                                                 |           |                  |       |
|------|-----------|--------------------------------------------------------------------------------------------------------------------|-------------------------------------------------------------------------------------------------------------------------|-------------------------------------------------------------------------------------------------------------------------------------------------------------|-------------------------------------------------|-----------|------------------|-------|
| 6.51 | 811.4834  | 811.4895[M-H] <sup>-</sup><br>Ara/Xyl] <sup>-</sup>                                                                | 769.4773[M-H-Ac] <sup>-</sup><br>475.3959[M-H-Ac-Ara/Xyl-Glc] <sup>-</sup>                                              | 637.4368[M-H-Ac-<br>trihydroxydammar-24-<br>en-6-yl 2- <i>O</i> -β-D-<br>Xylopyranosyl-, 6-<br>acetate isomer                                               | C <sub>43</sub> H <sub>72</sub> O <sub>14</sub> | 812.4922  | L5、L15、<br>Y5    | 1.23  |
| 6.52 | 1093.5808 | 1093.5847[M-H] <sup>-</sup><br>Glc] <sup>-</sup>                                                                   | 961.5435[M-H-Xyl/Ara] <sup>-</sup><br>799.4910[M-H-Glc-Xyl/Ara] <sup>-</sup><br>475.3764[M-H-3Glc-Xyl/Ara] <sup>-</sup> | 931.5202[M-H-<br>20S-sanchirrhinosides A <sub>6</sub><br>isomer                                                                                             | C <sub>53</sub> H <sub>90</sub> O <sub>23</sub> | 1094.5873 | L5、L15、<br>Y5、N5 | -1.19 |
| 6.54 | 1003.5454 | 1003.5481[M-H] <sup>-</sup><br>637.4175[M-H-Ac-Glc-Glc] <sup>-</sup>                                               | 961.5396[M-H-Ac] <sup>-</sup><br>475.3772[M-H-Ac-Glc-Glc-Glc] <sup>-</sup>                                              | 799.4832[M-H-Ac-Glc] <sup>-</sup><br>6-acetyl ginsenoside-<br>Rg <sub>3</sub> /isomer                                                                       | C <sub>50</sub> H <sub>84</sub> O <sub>20</sub> | 1004.5556 | L15、Y5、<br>N5    | 2.39  |
| 6.54 | 769.4724  | 769.4772[M-H] <sup>-</sup>                                                                                         | 637.4407[M-H-Xyl/Ara] <sup>-</sup><br>Xyl/Ara-Glc] <sup>-</sup>                                                         | 475.3722[M-H-<br>F <sub>3</sub> isomer                                                                                                                      | C <sub>41</sub> H <sub>70</sub> O <sub>13</sub> | 770.4816  | L15、Y5           | 1.82  |
| 6.64 | 947.522   | 947.5277[M+FA-H] <sup>-</sup><br>Xyl/Ara] <sup>-</sup>                                                             | 901.5203[M-H] <sup>-</sup><br>637.4319[M-H-2Xyl/Ara] <sup>-</sup><br>475.3788[M-H-2Xyl/Ara-<br>Glc] <sup>-</sup>        | 769.4726[M-H-<br>chikusetsusaponin LM <sub>2</sub><br>isomer                                                                                                | C <sub>46</sub> H <sub>78</sub> O <sub>17</sub> | 902.5239  | L15              | -4.66 |
| 6.74 | 925.4818  |                                                                                                                    | 925.4842[M-H] <sup>-</sup>                                                                                              | CS-IV                                                                                                                                                       | C <sub>47</sub> H <sub>74</sub> O <sub>18</sub> | 926.4875  | L5、L15、<br>Y5、N5 | -2.27 |
| 6.81 | 1153.6172 | 1153.6211[M+FA-H] <sup>-</sup><br>783.4902[M-H-Glc-Glc] <sup>-</sup><br>459.3881[M-H-Glc-Glc-Glc-Glc] <sup>-</sup> | 1107.5999[M-H] <sup>-</sup><br>621.4482[M-H-Glc-Glc-Glc] <sup>-</sup>                                                   | 945.5462[M-H-Glc] <sup>-</sup><br>Rb <sub>1</sub> isomer                                                                                                    | C <sub>54</sub> H <sub>92</sub> O <sub>23</sub> | 1108.6029 | L5、L15、<br>Y5、N5 | -4.33 |
| 6.95 | 825.5009  | 825.4978[M-H] <sup>-</sup>                                                                                         | 783.4903[M-H-Ac] <sup>-</sup><br>475.3888[M-H-Ac-Rha-Glc] <sup>-</sup>                                                  | 637.4395[M-H-Ac-Rha] <sup>-</sup><br>β-D-Glucopyranoside, (3β,<br>6α,12β,20 <i>R</i> )-3,12,20-<br>trihydroxydammar-24-<br>en-6-yl 2- <i>O</i> -(6-deoxy-α- | C <sub>44</sub> H <sub>74</sub> O <sub>14</sub> | 826.5079  | Y5、N5            | -0.97 |

|      |           | L-mannopyranosyl)-, 6-acetate isomer                                                                                                                                                                                                                                                                                                    |                                                                                                                                      |                                                 |           |              |       |
|------|-----------|-----------------------------------------------------------------------------------------------------------------------------------------------------------------------------------------------------------------------------------------------------------------------------------------------------------------------------------------|--------------------------------------------------------------------------------------------------------------------------------------|-------------------------------------------------|-----------|--------------|-------|
| 6.98 | 1149.6074 | 1149.6056[M-H] <sup>-</sup> 1107.5958[M-H-Ac] <sup>-</sup> 1089.5855[M-H-Ac-H <sub>2</sub> O] <sup>-</sup> 987.5480[M-H-Glc] <sup>-</sup> 945.5435[M-H-Ac-Glc] <sup>-</sup> 927.5342[M-H-Ac-Glc-H <sub>2</sub> O] <sup>-</sup> 783.4877[M-H-Ac-2Glc] <sup>-</sup> 621.4405[M-H-Ac-3Glc] <sup>-</sup> 459.3881[M-H-Ac-4Glc] <sup>-</sup> | Q-R <sub>1</sub> isomer                                                                                                              | C <sub>56</sub> H <sub>94</sub> O <sub>24</sub> | 1150.6135 | L5、L15、Y5、N5 | -1.48 |
| 7.04 | 769.473   | 769.4780[M-H] <sup>-</sup> 637.4293[M-H-Ara/Xyl] <sup>-</sup> 619.4254[M-H-Ara/Xyl-H <sub>2</sub> O] <sup>-</sup> 475.3819[M-H-Ara/Xyl-Glc] <sup>-</sup>                                                                                                                                                                                | F <sub>3</sub> isomer                                                                                                                | C <sub>41</sub> H <sub>70</sub> O <sub>13</sub> | 770.4816  | L5、L15、Y5、N5 | 1.04  |
| 7.08 | 1119.5959 | 1119.5964 1077.5883 1059.5768                                                                                                                                                                                                                                                                                                           | R-s <sub>2</sub> isomer                                                                                                              | C <sub>55</sub> H <sub>92</sub> O <sub>23</sub> | 1120.6029 | L5、L15、Y5、N5 | -0.71 |
| 7.13 | 1077.5817 | 1077.5881[M-H] <sup>-</sup> 945.5424[M-H-Xyl/Ara] <sup>-</sup> 783.4820[M-H-Xyl/Ara-Glc] <sup>-</sup> 621.4493[M-H-Xyl/Ara-2Glc] <sup>-</sup> 459.3929[M-H-Xyl/Ara-3Glc] <sup>-</sup>                                                                                                                                                   | Rb <sub>2</sub> isomer                                                                                                               | C <sub>53</sub> H <sub>90</sub> O <sub>22</sub> | 1078.5924 | L5、L15、Y5、N5 | 2.69  |
| 7.13 | 793.4396  | 793.4404[M-H] <sup>-</sup> 631.3859[M-H-Glc] <sup>-</sup> 613.3744[M-H-Glc-H <sub>2</sub> O] <sup>-</sup> 569.3856[M-H-Glc-CO <sub>2</sub> ] <sup>-</sup> 455.3530[M-H-Glc-GlcA] <sup>-</sup>                                                                                                                                           | CS-Iva                                                                                                                               | C <sub>42</sub> H <sub>66</sub> O <sub>14</sub> | 794.4453  | L5、L15、Y5、N5 | -2.65 |
| 7.17 | 915.5306  | 915.5325[M-H] <sup>-</sup> 783.4918[M-H-Xyl/Ara] <sup>-</sup> 637.4339[M-H-Xyl/Ara-Rha] <sup>-</sup> 475.3944[M-H-Xyl/Ara-Rha-Glc] <sup>-</sup>                                                                                                                                                                                         | β-D-Glucopyranoside, (3β, 6α,12β)-3,12-dihydroxy-20-(β-D-Xylopyranosyloxy) dammar-24-en-6-yl 2-O-(6-deoxy-α-L-mannopyranosyl)-isomer | C <sub>47</sub> H <sub>80</sub> O <sub>17</sub> | 916.5396  | L5、L15、Y5、N5 | 1.31  |

|      |           |                                                                                                                                                                                                                                                                                                                                                                                                                  |                                                    |                                                 |           |              |       |
|------|-----------|------------------------------------------------------------------------------------------------------------------------------------------------------------------------------------------------------------------------------------------------------------------------------------------------------------------------------------------------------------------------------------------------------------------|----------------------------------------------------|-------------------------------------------------|-----------|--------------|-------|
| 7.27 | 679.4408  | 679.4489[M-Ac] <sup>-</sup> 637.4302[M-H] <sup>-</sup> 475.3788[M-H-Glc] <sup>-</sup>                                                                                                                                                                                                                                                                                                                            | 20R-ginsenoside Rh1 6 <sup>+</sup> -acetate isomer | C <sub>38</sub> H <sub>64</sub> O <sub>10</sub> | 680.4499  | L15、Y5、N5    | 1.91  |
| 7.36 | 841.4969  | 841.5016[M-H] <sup>-</sup> 805.4004[M-H-H <sub>2</sub> O] <sup>-</sup> 799.4845[M-H-Ac] <sup>-</sup><br>781.4655[M-H-Ac-H <sub>2</sub> O] <sup>-</sup> 637.4320[M-H-Ac-Glc] <sup>-</sup><br>475.3926[M-H-Ac-2Glc] <sup>-</sup>                                                                                                                                                                                   | noto-Rt/isomer                                     | C <sub>44</sub> H <sub>74</sub> O <sub>15</sub> | 842.5028  | L5、L15、Y5、N5 | -2.26 |
| 7.41 | 1119.5978 | 1119.5997[M-H] <sup>-</sup> 1077.5891[M-H-Ac] <sup>-</sup> 1059.5795[M-H-Ac-H <sub>2</sub> O] <sup>-</sup> 945.5502[M-H-Ac-Xyl/Ara] <sup>-</sup> 783.4929[M-H-Ac-Xyl/Ara-Glc] <sup>-</sup> 765.4853[M-H-Ac-Xyl/Ara-Glc-H <sub>2</sub> O] <sup>-</sup><br>621.4379[M-H-Ac-Xyl/Ara-2Glc] <sup>-</sup> 459.3871[M-H-Ac-Xyl/Ara-3Glc] <sup>-</sup>                                                                   | Rs1 isomer                                         | C <sub>55</sub> H <sub>92</sub> O <sub>23</sub> | 1120.6029 | L5、L15、Y5、N5 | -2.41 |
| 7.48 | 1163.589  | 1163.5697[M-H] <sup>-</sup> 1119.5992[M-HCOO] <sup>-</sup> 1077.5875[M-H-HCOO-Ac] <sup>-</sup> 1059.5772[M-H-HCOO-Ac-H <sub>2</sub> O] <sup>-</sup> 945.5770[M-H-HCOO-Ac-Xyl/Ara] <sup>-</sup> 783.4948[M-H-HCOO-Ac-Xyl/Ara-Glc] <sup>-</sup><br>765.4912[M-H-HCOO-Ac-Xyl/Ara-Glc-H <sub>2</sub> O] <sup>-</sup> 621.4249[M-H-HCOO-Ac-Xyl/Ara-2Glc] <sup>-</sup> 459.3936[M-H-HCOO-Ac-Xyl/Ara-3Glc] <sup>-</sup> | Malonyl-ginsenosideRc isomer                       | C <sub>56</sub> H <sub>92</sub> O <sub>25</sub> | 1164.5928 | L5、L15、Y5、N5 | -3.44 |
| 7.49 | 1059.5786 | 1059.5801 945.5463 783.5000 621.4579                                                                                                                                                                                                                                                                                                                                                                             | Quinquenoside I isomer                             | C <sub>52</sub> H <sub>86</sub> O <sub>19</sub> | 1014.5763 | L15、Y5、N5    | -4.54 |
| 7.52 | 1149.6075 | 1149.6048 1107.5995 1089.5870 1077.5993 987.5319<br>945.5390 783.4874 621.4255                                                                                                                                                                                                                                                                                                                                   | Q-R1 isomer                                        | C <sub>56</sub> H <sub>94</sub> O <sub>24</sub> | 1150.6135 | L5、L15、N5    | -1.57 |
| 7.54 | 1077.5881 | 1077.5852[M-H] <sup>-</sup> 945.5452[M-H-Xyl/Ara] <sup>-</sup> 915.5419[M-H-Glc] <sup>-</sup> 783.4926[M-H-Glc-Xyl/Ara] <sup>-</sup> 765.4782[M-H-Glc-Xyl/Ara-H <sub>2</sub> O] <sup>-</sup> 621.4221[M-H-2Glc-Xyl/Ara] <sup>-</sup> 459.3994[M-H-3Glc-Xyl/Ara] <sup>-</sup>                                                                                                                                     | Rb2 isomer                                         | C <sub>53</sub> H <sub>90</sub> O <sub>22</sub> | 1078.5924 | L5、L15、Y5、N5 | -3.25 |

|      |           |                                                                                                  |                                                                                                                                                                                                       |                                                                                                                                               |                                                 |                                                 |           |                  |       |
|------|-----------|--------------------------------------------------------------------------------------------------|-------------------------------------------------------------------------------------------------------------------------------------------------------------------------------------------------------|-----------------------------------------------------------------------------------------------------------------------------------------------|-------------------------------------------------|-------------------------------------------------|-----------|------------------|-------|
| 7.65 | 931.5248  | 931.5227[M-H] <sup>-</sup><br>Xyl/Ara-H <sub>2</sub> O] <sup>-</sup>                             | 799.4649[M-H-Xyl/Ara] <sup>-</sup><br>637.3980[M-H-Xyl/Ara-Glc] <sup>-</sup><br>Xyl/Ara-2Glc] <sup>-</sup>                                                                                            | 781.4975[M-H-<br>475.3746[M-H-                                                                                                                | Re <sub>4</sub> isomer/NG-R <sub>1</sub> isomer | C <sub>47</sub> H <sub>80</sub> O <sub>18</sub> | 932.5345  | L15、Y5、<br>N5    | 2.04  |
| 7.69 | 829.4938  | 829.4938[M+FA-H] <sup>-</sup>                                                                    | 783.4847[M-H] <sup>-</sup><br>475.3752[M-H-Glc-Rha] <sup>-</sup>                                                                                                                                      | 621.4377[M-H-Glc] <sup>-</sup>                                                                                                                | Rg <sub>2</sub> isomer                          | C <sub>42</sub> H <sub>72</sub> O <sub>13</sub> | 784.4973  | L5、L15、<br>Y5、N5 | 6.13  |
| 7.71 | 961.5355  | 961.5419[M-H] <sup>-</sup>                                                                       | 799.4892[M-H-Glc] <sup>-</sup><br>475.3792[M-H-3Glc] <sup>-</sup>                                                                                                                                     | 637.4323[M-H-2Glc] <sup>-</sup>                                                                                                               | Re <sub>1</sub> isomer                          | C <sub>48</sub> H <sub>82</sub> O <sub>19</sub> | 962.545   | L5、L15、<br>Y5、N5 | 1.77  |
| 7.76 | 679.4408  | 679.4396[M-Ac] <sup>-</sup>                                                                      | 637.4322[M-H] <sup>-</sup><br>475.3744[M-H-Ac-Glc] <sup>-</sup>                                                                                                                                       | 619.4113[M-H-H <sub>2</sub> O] <sup>-</sup>                                                                                                   | 20R-ginsenoside Rh1 6'-<br>acetate isomer       | C <sub>38</sub> H <sub>64</sub> O <sub>10</sub> | 680.4499  | L15、Y5、<br>N5    | 1.91  |
| 7.8  | 815.479   | 815.4803[M-H] <sup>-</sup>                                                                       | 653.4264[M-H-Glc] <sup>-</sup><br>Glc] <sup>-</sup>                                                                                                                                                   | 491.3828[M-H-Glc-<br>Glc] <sup>-</sup>                                                                                                        | Panajaponol A/isomer                            | C <sub>42</sub> H <sub>72</sub> O <sub>15</sub> | 816.4871  | L5、L15、<br>Y5、N5 | 0.37  |
| 7.97 | 1119.5946 | 1119.5988[M-H] <sup>-</sup><br>H <sub>2</sub> O] <sup>-</sup>                                    | 1077.5883[M-H-Ac] <sup>-</sup><br>945.5323[M-H-Ac-Xyl/Ara] <sup>-</sup><br>Xyl/Ara-Glc] <sup>-</sup>                                                                                                  | 1059.5782[M-H-Ac-<br>783.4965[M-H-Ac-<br>621.4344[M-H-Ac-Xyl/Ara-2Glc] <sup>-</sup><br>459.3851[M-H-Ac-Xyl/Ara-3Glc] <sup>-</sup>             | Rs <sub>1</sub> isomer                          | C <sub>55</sub> H <sub>92</sub> O <sub>23</sub> | 1120.6029 | L5、L15、<br>Y5、N5 | 0.45  |
| 7.97 | 1059.5706 | 1059.5786[M+FA-H] <sup>-</sup><br>C <sub>4</sub> H <sub>4</sub> O-H <sub>2</sub> O] <sup>-</sup> | 945.5333[M-H-C <sub>4</sub> H <sub>4</sub> O] <sup>-</sup><br>765.4869[M-H-C <sub>4</sub> H <sub>4</sub> O-Glc-H <sub>2</sub> O] <sup>-</sup><br>H-C <sub>4</sub> H <sub>4</sub> O-2Glc] <sup>-</sup> | 927.5494[M-H-<br>621.4231[M-<br>459.3881[M-H-C <sub>4</sub> H <sub>4</sub> O-3Glc] <sup>-</sup>                                               | Quinquenoside I isomer                          | C <sub>52</sub> H <sub>86</sub> O <sub>19</sub> | 1014.5763 | L15、N5           | 3.35  |
| 8.09 | 987.5542  | 987.5578[M-H] <sup>-</sup>                                                                       | 945.5469[M-H-Ac] <sup>-</sup><br>841.4994[M-H-Rha] <sup>-</sup>                                                                                                                                       | 927.5306[M-H-Ac-H <sub>2</sub> O] <sup>-</sup><br>799.5353[M-H-Ac-Rha] <sup>-</sup><br>637.4142[M-H-<br>Ac-Rha-Glc] <sup>-</sup>              | Pseudoginsenoside<br>Rs <sub>1</sub> /isomer    | C <sub>50</sub> H <sub>84</sub> O <sub>19</sub> | 988.5607  | L5、L15、<br>Y5、N5 | -1.32 |
| 8.19 | 807.4815  | 807.4815[M-H] <sup>-</sup>                                                                       | 765.4404[M-H-Ac] <sup>-</sup><br>441.3430[M-H-Ac-2Glc] <sup>-</sup>                                                                                                                                   | 603.3835[M-H-Ac-Glc] <sup>-</sup>                                                                                                             | 20Z-ginsenoside-Rs <sub>4</sub><br>isomer       | C <sub>44</sub> H <sub>72</sub> O <sub>13</sub> | 808.4973  | L5、L15、<br>Y5、N5 | 9.91  |
| 8.25 | 841.4976  | 841.4957[M-H] <sup>-</sup>                                                                       | 799.4828[M-H-Ac] <sup>-</sup><br>679.4316[M-H-Glc] <sup>-</sup>                                                                                                                                       | 781.4806[M-H-Ac-H <sub>2</sub> O] <sup>-</sup><br>637.4337[M-H-Ac-Glc] <sup>-</sup><br>619.4211[M-H-<br>Ac-Glc-H <sub>2</sub> O] <sup>-</sup> | noto-Rt/isomer                                  | C <sub>44</sub> H <sub>74</sub> O <sub>15</sub> | 842.5028  | L5、L15、<br>Y5、N5 | -3.09 |

|      |          |                                                                                                                                                                                                                                                                                                                                                                                                                                   |                                                 |                                                 |           |                  |       |
|------|----------|-----------------------------------------------------------------------------------------------------------------------------------------------------------------------------------------------------------------------------------------------------------------------------------------------------------------------------------------------------------------------------------------------------------------------------------|-------------------------------------------------|-------------------------------------------------|-----------|------------------|-------|
| 8.31 | 945.5443 | 945.5464[M-H] <sup>-</sup> 783.4924[M-H-Glc] <sup>-</sup> 621.4346[M-H-2Glc] <sup>-</sup><br>459.3801[M-H-3Glc] <sup>-</sup>                                                                                                                                                                                                                                                                                                      | Rd isomer                                       | C <sub>48</sub> H <sub>82</sub> O <sub>18</sub> | 946.5501  | L5、L15、<br>Y5、N5 | -2.12 |
| 8.34 | 829.4948 | 829.4947[M+FA-H] <sup>-</sup> 783.4879[M-H] <sup>-</sup> 637.4256[M-H-Rha] <sup>-</sup><br>619.4134[M-H-Rha-H <sub>2</sub> O] <sup>-</sup> 475.3664[M-H-Rha-Glc] <sup>-</sup>                                                                                                                                                                                                                                                     | Rg <sub>2</sub> isomer                          | C <sub>42</sub> H <sub>72</sub> O <sub>13</sub> | 784.4973  | L5、L15、<br>Y5、N5 | 2.04  |
| 8.4  | 987.5528 | 987.5528[M-H] <sup>-</sup> 945.5436[M-H-Ac] <sup>-</sup> 927.5336[M-H-Ac-<br>H <sub>2</sub> O] <sup>-</sup> 765.4803[M-H-Ac-H <sub>2</sub> O-Glc] <sup>-</sup> 621.4381[M-H-Ac-<br>2Glc] <sup>-</sup> 459.3827[M-H-Ac-3Glc] <sup>-</sup>                                                                                                                                                                                          | 6'''-O-acetylgypenoside<br>XVII isomer          | C <sub>50</sub> H <sub>84</sub> O <sub>19</sub> | 988.5607  | L5、L15、<br>Y5、N5 | 0.10  |
| 8.6  | 1031.546 | 1031.5472[M-H] <sup>-</sup> 987.5576[M-H-CO <sub>2</sub> ] <sup>-</sup> 945.5482[M-H-CO <sub>2</sub> -<br>Ac] <sup>-</sup> 927.5375[M-H-CO <sub>2</sub> -Ac-H <sub>2</sub> O] <sup>-</sup> 783.4942[M-H-CO <sub>2</sub> -Ac-<br>Glc] <sup>-</sup> 765.4810[M-H-CO <sub>2</sub> -Ac-Glc-H <sub>2</sub> O] <sup>-</sup> 621.4350[M-H-CO <sub>2</sub> -<br>Ac-2Glc] <sup>-</sup> 459.3804[M-H-CO <sub>2</sub> -Ac-3Glc] <sup>-</sup> | Malonyl-ginsenoside Re<br>isomer                | C <sub>51</sub> H <sub>84</sub> O <sub>21</sub> | 1032.5505 | L5、L15、<br>Y5、N5 | -3.20 |
| 8.69 | 783.4893 | 783.4907[M-H] <sup>-</sup> 621.4342[M-H-Glc] <sup>-</sup> 459.3858[M-H-2Glc] <sup>-</sup>                                                                                                                                                                                                                                                                                                                                         | 20(S)-G-Rg <sub>3</sub> isomer                  | C <sub>42</sub> H <sub>72</sub> O <sub>13</sub> | 784.4973  | N5               | 0.26  |
| 8.75 | 961.5357 | 961.5382[M-H] <sup>-</sup> 799.4880[M-H-Glc] <sup>-</sup> 781.4725[M-H-Glc-<br>H <sub>2</sub> O] <sup>-</sup> 679.4304 637.4469[M-H-2Glc] <sup>-</sup> 475.3603[M-H-3Glc] <sup>-</sup>                                                                                                                                                                                                                                            | Re <sub>1</sub> isomer                          | C <sub>48</sub> H <sub>82</sub> O <sub>19</sub> | 962.545   | L5、L15、<br>Y5、N5 | 1.56  |
| 8.77 | 831.4737 | 831.4722[M+FA-H] <sup>-</sup> 785.4706[M-H] <sup>-</sup> 653.4274[M-H-<br>Xyl/Ara] <sup>-</sup> 491.3850[M-H-Xyl/Ara-Glc] <sup>-</sup>                                                                                                                                                                                                                                                                                            | M-R <sub>2</sub> /isomer                        | C <sub>41</sub> H <sub>70</sub> O <sub>14</sub> | 786.4766  | L5、L15、<br>Y5、N5 | -2.29 |
| 8.9  | 977.5219 | 977.5219[M+FA-H] <sup>-</sup> 931.5304[M-H] <sup>-</sup> 799.4721[M-H-<br>Xyl/Ara] <sup>-</sup> 637.4305[M-H-Xyl/Ara-Glc] <sup>-</sup> 475.3873[M-H-<br>Xyl/Ara-2Glc] <sup>-</sup>                                                                                                                                                                                                                                                | Re <sub>4</sub> isomer/NG-R <sub>1</sub> isomer | C <sub>47</sub> H <sub>80</sub> O <sub>18</sub> | 932.5345  | L5、L15、<br>Y5、N5 | 6.76  |
| 8.98 | 913.5198 | 913.5173[M+FA-H] <sup>-</sup> 867.5149[M-H] <sup>-</sup> 781.4694[M-H-C <sub>4</sub> H <sub>4</sub> O-<br>H <sub>2</sub> O] <sup>-</sup> 799.4615[M-H-C <sub>4</sub> H <sub>4</sub> O] <sup>-</sup> 637.4379[M-H-C <sub>4</sub> H <sub>4</sub> O-Glc] <sup>-</sup><br>619.4215[M-H-C <sub>4</sub> H <sub>4</sub> O-Glc-H <sub>2</sub> O] <sup>-</sup> 475.38249[M-H-C <sub>4</sub> H <sub>4</sub> O-2Glc] <sup>-</sup>            | koryoginsenoside-<br>R <sub>1</sub> /isomer     | C <sub>46</sub> H <sub>76</sub> O <sub>15</sub> | 868.5184  | L5、L15、<br>Y5、N5 | -4.96 |
| 9.06 | 1031.548 | 1031.5461[M-H] <sup>-</sup> 987.5568[M-H-CO <sub>2</sub> ] <sup>-</sup> 945.5492[M-H-CO <sub>2</sub> -<br>Ac] <sup>-</sup> 783.4991[M-H-CO <sub>2</sub> -Ac-Glc] <sup>-</sup> 621.4164[M-H-CO <sub>2</sub> -Ac-<br>Glc-Glc] <sup>-</sup> 459.3901[M-H-CO <sub>2</sub> -Ac-Glc-Glc-Glc] <sup>-</sup>                                                                                                                               | Malonyl-ginsenoside Re<br>isomer                | C <sub>51</sub> H <sub>84</sub> O <sub>21</sub> | 1032.5505 | L5、L15、<br>Y5、N5 | -5.14 |

|      |           |                                                                                                                                                                                                                                                                                                                                                                                                                                                                                                                 |                                                                                                                                                             |                                                |                                             |                                                  |           |                  |       |
|------|-----------|-----------------------------------------------------------------------------------------------------------------------------------------------------------------------------------------------------------------------------------------------------------------------------------------------------------------------------------------------------------------------------------------------------------------------------------------------------------------------------------------------------------------|-------------------------------------------------------------------------------------------------------------------------------------------------------------|------------------------------------------------|---------------------------------------------|--------------------------------------------------|-----------|------------------|-------|
| 9.06 | 987.553   | 987.5548[M-H] <sup>-</sup><br>783.4851[M-H-Ac-Glc] <sup>-</sup><br>459.3694[M-H-Ac-Glc-Glc-Glc] <sup>-</sup>                                                                                                                                                                                                                                                                                                                                                                                                    | 945.5493[M-H-Ac] <sup>-</sup><br>621.4411[M-H-Ac-Glc-Glc] <sup>-</sup>                                                                                      | 927.5308[M-H-Ac-H <sub>2</sub> O] <sup>-</sup> | 6'''-O-acetylgyenoside<br>XVII isomer       | C <sub>50</sub> H <sub>84</sub> O <sub>19</sub>  | 988.5607  | L5、L15、<br>Y5、N5 | -0.10 |
| 9.08 | 1239.632  | 1107.5982[M-H-Xyl] <sup>-</sup>                                                                                                                                                                                                                                                                                                                                                                                                                                                                                 | 945.5493[M-H-Xyl-Glc] <sup>-</sup>                                                                                                                          |                                                | NG-R <sub>4</sub>                           | C <sub>55</sub> H <sub>100</sub> O <sub>30</sub> | 1240.6299 | L5、L15、<br>Y5、N5 | -7.99 |
| 9.09 | 845.4926  | 845.4900[M+HCOO] <sup>-</sup><br>475.3802[M-H-2Glc] <sup>-</sup>                                                                                                                                                                                                                                                                                                                                                                                                                                                | 799.4860[M-H] <sup>-</sup><br>637.4344[M-H-Glc] <sup>-</sup>                                                                                                |                                                | 20(S)-G-Rf-1a                               | C <sub>42</sub> H <sub>72</sub> O <sub>14</sub>  | 800.4922  | L5、L15、<br>Y5、N5 | -2.00 |
| 9.09 | 799.4869  | 799.4891[M-H] <sup>-</sup><br>637.4353[M-H-Glc] <sup>-</sup><br>475.3801[M-H-2Glc] <sup>-</sup>                                                                                                                                                                                                                                                                                                                                                                                                                 |                                                                                                                                                             |                                                | 20(S)-G-Rf                                  | C <sub>42</sub> H <sub>72</sub> O <sub>14</sub>  | 800.4922  | L5、L15、<br>Y5、N5 | -3.13 |
| 9.09 | 799.4869  | 799.4891[M-H] <sup>-</sup><br>637.4353[M-H-Glc] <sup>-</sup><br>475.3801[M-H-2Glc] <sup>-</sup>                                                                                                                                                                                                                                                                                                                                                                                                                 |                                                                                                                                                             |                                                | 20(R)-G-Rf                                  | C <sub>42</sub> H <sub>72</sub> O <sub>14</sub>  | 800.4922  | L5、L15、<br>Y5、N5 | -3.13 |
| 9.15 | 913.4741  | 913.4822[M+FA-H] <sup>-</sup><br>637.4326[M-H-C <sub>4</sub> H <sub>4</sub> O-Glc] <sup>-</sup><br>1107.6022[M-H-Glc] <sup>-</sup><br>1089.5601[M-H-Glc-H <sub>2</sub> O] <sup>-</sup><br>945.5489[M-H-Glc-Glc] <sup>-</sup><br>783.4800[M-H-Glc-Glc-Glc] <sup>-</sup><br>459.3861[M-H-Glc-Glc-Glc-Glc-Glc] <sup>-</sup><br>947.5275[M+FA-H] <sup>-</sup><br>901.5202[M-H] <sup>-</sup><br>769.4802[M-H-Xyl/Ara] <sup>-</sup><br>637.4297[M-H-2Xyl/Ara] <sup>-</sup><br>475.3774[M-H-2Xyl/Ara-Glc] <sup>-</sup> | 867.5110[M-H] <sup>-</sup><br>799.4850[M-H-C <sub>4</sub> H <sub>4</sub> O] <sup>-</sup><br>475.3892[M-H-C <sub>4</sub> H <sub>4</sub> O-2Glc] <sup>-</sup> |                                                | koryoginsenoside-<br>R <sub>1</sub> /isomer | C <sub>46</sub> H <sub>76</sub> O <sub>15</sub>  | 868.5184  | L5、L15、<br>Y5、N5 | -0.46 |
| 9.52 | 1269.65   | 1107.6022[M-H-Glc] <sup>-</sup><br>1089.5601[M-H-Glc-H <sub>2</sub> O] <sup>-</sup><br>945.5489[M-H-Glc-Glc] <sup>-</sup><br>783.4800[M-H-Glc-Glc-Glc] <sup>-</sup><br>459.3861[M-H-Glc-Glc-Glc-Glc-Glc] <sup>-</sup><br>947.5275[M+FA-H] <sup>-</sup><br>901.5202[M-H] <sup>-</sup><br>769.4802[M-H-Xyl/Ara] <sup>-</sup><br>637.4297[M-H-2Xyl/Ara] <sup>-</sup><br>475.3774[M-H-2Xyl/Ara-Glc] <sup>-</sup>                                                                                                    |                                                                                                                                                             |                                                | Ra <sub>0</sub> isomer                      | C <sub>60</sub> H <sub>102</sub> O <sub>28</sub> | 1270.6558 | L5、L15、<br>Y5、N5 | -1.58 |
| 9.66 | 947.5235  | 947.5275[M+FA-H] <sup>-</sup><br>901.5202[M-H] <sup>-</sup><br>769.4802[M-H-Xyl/Ara] <sup>-</sup><br>637.4297[M-H-2Xyl/Ara] <sup>-</sup><br>475.3774[M-H-2Xyl/Ara-Glc] <sup>-</sup>                                                                                                                                                                                                                                                                                                                             |                                                                                                                                                             |                                                | chikusetsusaponin LM <sub>2</sub><br>isomer | C <sub>46</sub> H <sub>78</sub> O <sub>17</sub>  | 902.5239  | L5、L15、<br>Y5、N5 | -4.55 |
| 9.67 | 845.4901  | 845.4864[M+FA-H] <sup>-</sup><br>475.3758[M-H-2Glc] <sup>-</sup>                                                                                                                                                                                                                                                                                                                                                                                                                                                | 799.4923[M-H] <sup>-</sup><br>637.4226[M-H-Glc] <sup>-</sup>                                                                                                |                                                | Rg <sub>1</sub> isomer                      | C <sub>42</sub> H <sub>72</sub> O <sub>14</sub>  | 800.4922  | L15、Y5、<br>N5    | -9.88 |
| 9.75 | 945.5404  | 945.5440[M-H] <sup>-</sup><br>459.3732[M-H-3Glc] <sup>-</sup>                                                                                                                                                                                                                                                                                                                                                                                                                                                   | 783.4906[M-H-Glc] <sup>-</sup><br>621.4374[M-H-2Glc] <sup>-</sup>                                                                                           |                                                | Rd isomer                                   | C <sub>48</sub> H <sub>82</sub> O <sub>18</sub>  | 946.5501  | L5、L15、<br>Y5、N5 | 2.01  |
| 9.77 | 1031.5434 | 1031.5494[M-H] <sup>-</sup><br>783.5040[M-H-CO <sub>2</sub> -Ac-Glc] <sup>-</sup><br>459.3853[M-H-CO <sub>2</sub> -Ac-3Glc] <sup>-</sup>                                                                                                                                                                                                                                                                                                                                                                        | 987.5551[M-H-CO <sub>2</sub> ] <sup>-</sup><br>621.4093[M-H-CO <sub>2</sub> -Ac-2Glc] <sup>-</sup>                                                          | 945.5428[M-H-CO <sub>2</sub> -Ac] <sup>-</sup> | Malonyl-ginsenoside Re<br>isomer            | C <sub>51</sub> H <sub>84</sub> O <sub>21</sub>  | 1032.5505 | L15、Y5、<br>N5    | -0.68 |

|       |           |                                                                                 |                                                                                         |                                                                                                              |                                        |                                                  |           |                      |       |
|-------|-----------|---------------------------------------------------------------------------------|-----------------------------------------------------------------------------------------|--------------------------------------------------------------------------------------------------------------|----------------------------------------|--------------------------------------------------|-----------|----------------------|-------|
| 9.78  | 987.5535  | 987.5529[M-H] <sup>-</sup><br>H <sub>2</sub> O] <sup>-</sup>                    | 945.5419[M-H-Ac] <sup>-</sup><br>783.4873[M-H-Ac-Glc] <sup>-</sup>                      | 927.5268[M-H-Ac-<br>765.4957[M-H-Ac-Glc-H <sub>2</sub> O] <sup>-</sup><br>621.4374[M-H-Ac-2Glc] <sup>-</sup> | 6'''-O-acetylgypenoside<br>XVII isomer | C <sub>50</sub> H <sub>84</sub> O <sub>19</sub>  | 988.5607  | L5、L15、<br>Y5、N5     | -0.61 |
| 9.83  | 815.4818  | 815.4829[M+HCOO] <sup>-</sup>                                                   | 769.4762[M-H] <sup>-</sup><br>Xyl] <sup>-</sup>                                         | 637.4333[M-H-<br>475.3792[M-H-Xyl-Glc] <sup>-</sup>                                                          | 20(S)-NG-R <sub>2</sub>                | C <sub>41</sub> H <sub>70</sub> O <sub>13</sub>  | 770.4816  | L5、L15、<br>Y5、N5     | -3.12 |
| 9.83  | 769.4761  | 769.4793[M-H] <sup>-</sup>                                                      | 637.4369[M-H-Ara] <sup>-</sup><br>Glc] <sup>-</sup>                                     | 475.3803[M-H-Ara-<br>Glc] <sup>-</sup>                                                                       | G-F <sub>3</sub>                       | C <sub>41</sub> H <sub>70</sub> O <sub>13</sub>  | 770.4816  | L5、<br>L15、<br>Y5、N5 | -2.99 |
| 10.25 | 1209.6298 | 1077.5890[M-H-Xyl] <sup>-</sup><br>783.4951[M-H-Xyl-Ara(f)-Glc] <sup>-</sup>    | 945.5514[M-H-Xyl-Ara(f)] <sup>-</sup><br>621.4350[M-H-Xyl-Ara(f)-<br>2Glc] <sup>-</sup> |                                                                                                              | G-Ra <sub>2</sub>                      | C <sub>58</sub> H <sub>98</sub> O <sub>26</sub>  | 1210.6346 | L5、L15、<br>Y5、N5     | -2.48 |
| 10.39 | 887.4989  | 887.5080[M+FA-H] <sup>-</sup><br>781.4728[M-H-Ac-H <sub>2</sub> O] <sup>-</sup> | 841.5007[M-H] <sup>-</sup><br>637.4221[M-H-Ac-Glc] <sup>-</sup>                         | 799.4905[M-H-Ac] <sup>-</sup><br>475.3722[M-H-Ac-2Glc] <sup>-</sup>                                          | noto-Rt/isomer                         | C <sub>44</sub> H <sub>74</sub> O <sub>15</sub>  | 842.5028  | L5、L15、<br>Y5、N5     | -6.77 |
| 10.42 | 1029.563  | 1029.5696[M-H] <sup>-</sup><br>783.4938[M-H-2Ac-Glc] <sup>-</sup>               | 987.5551[M-H-Ac] <sup>-</sup><br>621.4501[M-H-2Ac-2Glc] <sup>-</sup>                    | 945.5430[M-H-2Ac] <sup>-</sup><br>459.4029[M-H-2Ac-3Glc] <sup>-</sup>                                        | Diacetyl-G-Rd isomer                   | C <sub>52</sub> H <sub>86</sub> O <sub>20</sub>  | 1030.5712 | L15、Y5、<br>N5        | 0.39  |
| 10.42 | 1239.6404 | 1107.5963[M-H-Xyl] <sup>-</sup>                                                 | 945.5535[M-H-Xyl-Glc] <sup>-</sup><br>783.4811[M-H-Xyl-2Glc] <sup>-</sup>               |                                                                                                              | G-Ra <sub>3</sub>                      | C <sub>59</sub> H <sub>100</sub> O <sub>27</sub> | 1240.6452 | L5、L15、<br>Y5、N5     | -2.42 |
| 10.47 | 769.4748  | 769.4790[M-H] <sup>-</sup>                                                      | 637.4347[M-H-Xyl] <sup>-</sup><br>Glc] <sup>-</sup>                                     | 475.3819[M-H-Xyl-<br>Glc] <sup>-</sup>                                                                       | 20(R)-NG-R <sub>2</sub>                | C <sub>41</sub> H <sub>70</sub> O <sub>13</sub>  | 770.4816  | L5、L15、<br>Y5        | -1.30 |
| 10.49 | 1107.5974 |                                                                                 | 1107.6017[M-H] <sup>-</sup>                                                             |                                                                                                              | G-Rb <sub>1</sub>                      | C <sub>54</sub> H <sub>92</sub> O <sub>23</sub>  | 1108.6029 | L5、L15、<br>Y5、N5     | -2.08 |
| 10.55 | 783.4924  | 783.4928[M-H] <sup>-</sup>                                                      | 637.4318[M-H-Rha] <sup>-</sup><br>Glc] <sup>-</sup>                                     | 475.3794[M-H-Rha-<br>Glc] <sup>-</sup>                                                                       | 20(S)-G-Rg <sub>2</sub>                | C <sub>42</sub> H <sub>72</sub> O <sub>13</sub>  | 784.4973  | L5、L15、<br>Y5、N5     | -3.70 |

|       |           |                                                                                                                                                                                                                                                                                                                                                                                                                |                                         |                                                 |           |              |       |
|-------|-----------|----------------------------------------------------------------------------------------------------------------------------------------------------------------------------------------------------------------------------------------------------------------------------------------------------------------------------------------------------------------------------------------------------------------|-----------------------------------------|-------------------------------------------------|-----------|--------------|-------|
| 10.55 | 783.4924  | 783.4928[M-H] <sup>-</sup> 637.4318[M-H-Rha-Glc] <sup>-</sup> 475.3794[M-H-Rha-Glc] <sup>-</sup>                                                                                                                                                                                                                                                                                                               | 20(R)-G-Rg <sub>2</sub>                 | C <sub>42</sub> H <sub>72</sub> O <sub>13</sub> | 784.4973  | L5、L15、Y5、N5 | -3.70 |
| 10.64 | 913.5193  | 913.5207[M+FA-H] <sup>-</sup> 867.5122[M-H] <sup>-</sup> 799.4863[M-H-C <sub>4</sub> H <sub>4</sub> O] <sup>-</sup> 781.4766[M-H-C <sub>4</sub> H <sub>4</sub> O-H <sub>2</sub> O] <sup>-</sup> 637.4431[M-H-C <sub>4</sub> H <sub>4</sub> O-Glc] <sup>-</sup> 619.4244[M-H-C <sub>4</sub> H <sub>4</sub> O-Glc-H <sub>2</sub> O] <sup>-</sup> 475.3763[M-H-C <sub>4</sub> H <sub>4</sub> O-2Glc] <sup>-</sup> | koryoginsenoside-R <sub>1</sub> /isomer | C <sub>46</sub> H <sub>76</sub> O <sub>15</sub> | 868.5184  | L5、L15、Y5、N5 | -1.84 |
| 10.64 | 683.4398  | 683.4405[M+FA-H] <sup>-</sup> 637.4328[M-H] <sup>-</sup> 475.3751[M-H-Glc] <sup>-</sup>                                                                                                                                                                                                                                                                                                                        | F <sub>1</sub> isomer                   | C <sub>36</sub> H <sub>62</sub> O <sub>9</sub>  | 638.4394  | L5、L15、Y5、N5 | -1.88 |
| 10.78 | 827.4786  | 827.4932[M+FA-H] <sup>-</sup> 781.4815[M-H] <sup>-</sup> 635.4420[M-H-Rha-Glc] <sup>-</sup> 473.3696[M-H-Rha-Glc] <sup>-</sup>                                                                                                                                                                                                                                                                                 | ginsenoside Rh <sub>14</sub> isomer     | C <sub>42</sub> H <sub>70</sub> O <sub>13</sub> | 782.4816  | N5           | -9.85 |
| 10.84 | 987.5531  | 987.5546 945.5432 927.5393 783.4911 621.4502                                                                                                                                                                                                                                                                                                                                                                   | 6'''-O-acetylgypenoside XVII isomer     | C <sub>50</sub> H <sub>84</sub> O <sub>19</sub> | 988.5607  | L15、N5       | -0.20 |
| 10.97 | 829.413   | 829.5156[M+FA-H] <sup>-</sup> 783.4889[M-H] <sup>-</sup> 637.4366[M-H-Rha-Glc] <sup>-</sup> 475.3769[M-H-Rha-Glc] <sup>-</sup>                                                                                                                                                                                                                                                                                 | Rg <sub>2</sub> isomer                  | C <sub>42</sub> H <sub>72</sub> O <sub>13</sub> | 784.4973  | L5、L15、Y5、N5 | 0.77  |
| 10.97 | 793.4395  | 793.4411[M-H] <sup>-</sup> 731.4369 631.3752[M-H-Glc] <sup>-</sup> 613.3723[M-H-Glc-H <sub>2</sub> O] <sup>-</sup> 455.3515[M-H-Glc-GlcA]                                                                                                                                                                                                                                                                      | CS-Iva isomer                           | C <sub>42</sub> H <sub>66</sub> O <sub>14</sub> | 794.4453  | L5、L15、Y5、N5 | -2.52 |
| 11.04 | 1209.6294 | 1077.5893[M-H-Xyl] <sup>-</sup> 945.5445[M-H-Xyl-Ara(p)] <sup>-</sup> 783.4912[M-H-Xyl-Ara(p)-Glc] <sup>-</sup>                                                                                                                                                                                                                                                                                                | G-Ra <sub>1</sub>                       | C <sub>58</sub> H <sub>98</sub> O <sub>26</sub> | 1210.6346 | L5、L15、Y5、N5 | -2.15 |
| 11.06 | 1123.5928 | 1123.5928[M+HCOO] <sup>-</sup> 1077.5920[M-H] <sup>-</sup> 945.5500[M-H-Ara(f)] <sup>-</sup> 783.4880[M-H-Ara(f)-Glc] <sup>-</sup>                                                                                                                                                                                                                                                                             | G-Rc                                    | C <sub>53</sub> H <sub>90</sub> O <sub>22</sub> | 1078.5924 | L5、L15、Y5、N5 | -6.87 |
| 11.12 | 683.4397  | 683.4425[M+HCOO] <sup>-</sup> 637.4366[M-H] <sup>-</sup> 475.3809[M-H-Glc] <sup>-</sup>                                                                                                                                                                                                                                                                                                                        | 20(S)-G-Rh <sub>1</sub>                 | C <sub>36</sub> H <sub>62</sub> O <sub>9</sub>  | 638.4393  | L5、L15、Y5、N5 | -8.00 |
| 11.12 | 683.4397  | 683.4425[M+HCOO] <sup>-</sup> 637.4366[M-H] <sup>-</sup> 475.3809[M-H-Glc] <sup>-</sup>                                                                                                                                                                                                                                                                                                                        | 20(R)-G-Rh <sub>1</sub>                 | C <sub>36</sub> H <sub>62</sub> O <sub>9</sub>  | 638.4393  | L5、L15、Y5、N5 | -8.00 |
| 11.19 | 845.4871  | 845.4671[M+FA-H] <sup>-</sup> 799.4874[M-H] <sup>-</sup> 637.4502[M-H-Glc] <sup>-</sup> 475.3769[M-H-2Glc] <sup>-</sup>                                                                                                                                                                                                                                                                                        | Rg <sub>1</sub> isomer                  | C <sub>42</sub> H <sub>72</sub> O <sub>14</sub> | 800.4922  | L5、L15、Y5、N5 | -3.75 |

|       |           |                                                                                                                                                                                                                                                                                                                                                                                                                      |                                                                                                                                                 |                                                 |           |              |       |
|-------|-----------|----------------------------------------------------------------------------------------------------------------------------------------------------------------------------------------------------------------------------------------------------------------------------------------------------------------------------------------------------------------------------------------------------------------------|-------------------------------------------------------------------------------------------------------------------------------------------------|-------------------------------------------------|-----------|--------------|-------|
| 11.43 | 913.518   | 913.5177[M+FA-H] <sup>-</sup> 867.5096[M-H] <sup>-</sup> 799.4952[M-H-C <sub>4</sub> H <sub>4</sub> O] <sup>-</sup><br>781.4744[M-H-C <sub>4</sub> H <sub>4</sub> O-H <sub>2</sub> O] <sup>-</sup> 637.4505[M-H-C <sub>4</sub> H <sub>4</sub> O-Glc] <sup>-</sup><br>619.4416[M-H-C <sub>4</sub> H <sub>4</sub> O-Glc-H <sub>2</sub> O] <sup>-</sup> 475.3893[M-H-C <sub>4</sub> H <sub>4</sub> O-2Glc] <sup>-</sup> | koryoginsenoside-R <sub>1</sub> /isomer                                                                                                         | C <sub>46</sub> H <sub>76</sub> O <sub>15</sub> | 868.5184  | L5、L15、Y5、N5 | 1.15  |
| 11.55 | 1077.5876 | 1077.5888[M-H] <sup>-</sup> 945.5490[M-H-Ara(p)] <sup>-</sup> 783.4941[M-H-Ara(p)-Glc] <sup>-</sup>                                                                                                                                                                                                                                                                                                                  | G-Rb <sub>2</sub>                                                                                                                               | C <sub>53</sub> H <sub>90</sub> O <sub>22</sub> | 1078.5924 | L5、L15、Y5、N5 | -2.78 |
| 11.55 | 1077.5876 | 1077.5888[M-H] <sup>-</sup>                                                                                                                                                                                                                                                                                                                                                                                          | G-Rb <sub>3</sub>                                                                                                                               | C <sub>53</sub> H <sub>90</sub> O <sub>22</sub> | 1078.5924 | L5、L15、Y5、N5 | -2.78 |
| 11.58 | 825.4972  | 825.4998[M-H] <sup>-</sup> 783.4838[M-H-Ac] <sup>-</sup> 765.4795[M-H-Ac-H <sub>2</sub> O] <sup>-</sup><br>621.4407[M-H-Ac-Glc] <sup>-</sup> 603.4303[M-H-Ac-Glc-H <sub>2</sub> O] <sup>-</sup><br>459.3765[M-H-Ac-2Glc] <sup>-</sup>                                                                                                                                                                                | Rs <sub>3</sub> isomer                                                                                                                          | C <sub>44</sub> H <sub>74</sub> O <sub>14</sub> | 826.5079  | L5、L15、Y5、N5 | 3.51  |
| 11.6  | 845.4915  | 845.4839[M+FA-H] <sup>-</sup> 799.4891[M-H] <sup>-</sup> 637.4364[M-H-Glc] <sup>-</sup><br>475.3769[M-H-2Glc] <sup>-</sup>                                                                                                                                                                                                                                                                                           | Rg <sub>1</sub> isomer                                                                                                                          | C <sub>42</sub> H <sub>72</sub> O <sub>14</sub> | 800.4922  | L5、L15、Y5    | -5.88 |
| 11.77 | 841.4951  | 841.4975[M-H] <sup>-</sup> 799.4912[M-H-Ac] <sup>-</sup> 679.4430[M-H-Glc] <sup>-</sup><br>781.4742[M-H-Ac-H <sub>2</sub> O] <sup>-</sup> 637.4256[M-H-Ac-Glc] <sup>-</sup><br>619.4249[M-H-Ac-Glc-H <sub>2</sub> O] <sup>-</sup> 475.3691[M-H-Ac-2Glc] <sup>-</sup>                                                                                                                                                 | noto-Rt/isomer                                                                                                                                  | C <sub>44</sub> H <sub>74</sub> O <sub>15</sub> | 842.5028  | L5、L15、Y5、N5 | -0.12 |
| 11.82 | 1209.6284 | 1077.5880[M-H-Xyl] <sup>-</sup> 1047.5737[M-H-Glc] <sup>-</sup> 945.5471[M-H-Xyl-Ara(p)] <sup>-</sup> 783.4912[M-H-Xyl-Ara(f)-Glc] <sup>-</sup> 765.4903[M-H-Xyl-Ara(f)-Glc-H <sub>2</sub> O] <sup>-</sup> 621.4420[M-H-Xyl-Ara(f)-2Glc] <sup>-</sup><br>459.3802[M-H-Xyl-Ara(f)-3Glc] <sup>-</sup>                                                                                                                  | G-Ra <sub>1</sub> isomer                                                                                                                        | C <sub>58</sub> H <sub>98</sub> O <sub>26</sub> | 1210.6346 | L5、L15、Y5、N5 | -1.32 |
| 11.91 | 825.4982  | 825.4972[M-H] - 783.5059[M-H-Ac] <sup>-</sup> 765.4744[[M-H-Ac-H <sub>2</sub> O] <sup>-</sup><br>621.4430[M-H-Ac-Glc] <sup>-</sup> 475.3766[M-H-Ac-Glc-Rha] <sup>-</sup>                                                                                                                                                                                                                                             | β-D-Glucopyranoside, (3β, 6α,12β,20 <i>R</i> )-3,12,20-trihydroxydammar-24-en-6-yl 2- <i>O</i> -(6-deoxy-α-L-mannopyranosyl)-, 6-acetate isomer | C <sub>44</sub> H <sub>74</sub> O <sub>14</sub> | 826.5079  | L5、L15、Y5、N5 | 2.30  |

|       |           |                                                                                                                                                      |                                                                                                                                                                                                                |                                                                            |          |          |                                                                                                                                         |                                                 |           |                  |       |
|-------|-----------|------------------------------------------------------------------------------------------------------------------------------------------------------|----------------------------------------------------------------------------------------------------------------------------------------------------------------------------------------------------------------|----------------------------------------------------------------------------|----------|----------|-----------------------------------------------------------------------------------------------------------------------------------------|-------------------------------------------------|-----------|------------------|-------|
| 11.97 | 969.5422  | 969.5422                                                                                                                                             | 927.5105                                                                                                                                                                                                       | 783.4861                                                                   | 621.4352 | 459.3712 | 6'''-O-acetylgypenoside<br>XVII isomer                                                                                                  | C <sub>50</sub> H <sub>84</sub> O <sub>19</sub> | 988.5607  | L5、L15、<br>N5    | 0.10  |
| 12    | 785.467   | 785.4922[M+FA-H] <sup>-</sup><br>Xyl/Ara] <sup>-</sup>                                                                                               | 739.4622[M-H] <sup>-</sup><br>475.3762[M-H-2Xyl/Ara] <sup>-</sup>                                                                                                                                              | 607.4191[M-H-<br>Xyl/Ara] <sup>-</sup>                                     |          |          | β-D-Xylopyranoside, (3β,<br>6α,12β)-3,12,20-<br>trihydroxydammar-24-en-<br>6-yl 2-O-Xylopyranosyl-<br>isomer                            | C <sub>40</sub> H <sub>68</sub> O <sub>12</sub> | 740.4711  | L15、Y5           | 1.49  |
| 12.07 | 1149.6077 | 1149.6140[M-H] <sup>-</sup><br>945.5271[M-H-Ac-Glc] <sup>-</sup>                                                                                     | 1107.5995[M-H-Ac] <sup>-</sup><br>783.4751[M-H-Ac-2Glc] <sup>-</sup>                                                                                                                                           |                                                                            |          |          | Q-R <sub>1</sub>                                                                                                                        | C <sub>56</sub> H <sub>94</sub> O <sub>24</sub> | 1150.6135 | L5、L15、<br>Y5、N5 | -1.74 |
| 12.08 | 869.4886  | 869.4886[M-H] <sup>-</sup><br>765.4845[M-H-CO <sub>2</sub> -Ac-H <sub>2</sub> O] <sup>-</sup><br>459.3842[M-H-CO <sub>2</sub> -Ac-2Glc] <sup>-</sup> | 825.5047[M-H-CO <sub>2</sub> ] <sup>-</sup><br>621.4388[M-H-CO <sub>2</sub> -Ac-<br>Glc] <sup>-</sup>                                                                                                          | 783.4911[M-H-CO <sub>2</sub> -<br>Ac] <sup>-</sup>                         |          |          | β-D-Glucopyranoside, (3β,<br>12β)-20-[[6-O-(2-<br>carboxyacetyl)-β-D-<br>glucopyranosyl]oxy]-<br>12-hydroxydammar-24-<br>en-3-yl isomer | C <sub>45</sub> H <sub>74</sub> O <sub>16</sub> | 870.4977  | L5、L15、<br>Y5、N5 | 1.50  |
| 12.1  | 683.4369  | 683.4372[M+FA-H] <sup>-</sup>                                                                                                                        | 637.4343[M-H] <sup>-</sup>                                                                                                                                                                                     | 475.3808[M-H-Glc] <sup>-</sup>                                             |          |          | F <sub>1</sub> isomer                                                                                                                   | C <sub>36</sub> H <sub>62</sub> O <sub>9</sub>  | 638.4394  | L5、L15、<br>Y5、N5 | -4.24 |
| 12.14 | 1047.5746 | 1047.5763[M-H] <sup>-</sup><br>2Xyl/Ara] <sup>-</sup>                                                                                                | 915.5345[M-H-Xyl/Ara] <sup>-</sup><br>621.4351[M-H-2Xyl/Ara-Glc] <sup>-</sup>                                                                                                                                  | 783.4937[M-H-<br>2Xyl/Ara] <sup>-</sup>                                    |          |          | Notoginsenoside O isomer                                                                                                                | C <sub>52</sub> H <sub>88</sub> O <sub>21</sub> | 1048.5818 | L5、L15、<br>Y5、N5 | -0.57 |
| 12.17 | 1013.5757 | 1013.5757[M-H] <sup>-</sup><br>C <sub>4</sub> H <sub>4</sub> O-Glc] <sup>-</sup>                                                                     | 945.5216[M-H-C <sub>4</sub> H <sub>4</sub> O] <sup>-</sup><br>621.4246[M-H-C <sub>4</sub> H <sub>4</sub> O-Glc-Glc] <sup>-</sup><br>459.3778[M-H-<br>C <sub>4</sub> H <sub>4</sub> O-Glc-Glc-Glc] <sup>-</sup> | 783.4902[M-H-<br>C <sub>4</sub> H <sub>4</sub> O-Glc-Glc-Glc] <sup>-</sup> |          |          | Quinquenoside I isomer                                                                                                                  | C <sub>52</sub> H <sub>86</sub> O <sub>19</sub> | 1014.5763 | L5、Y5、<br>N5     | -7.10 |
| 12.3  | 829.495   | 829.5220[M+FA-H] <sup>-</sup>                                                                                                                        | 783.4936[M-H] <sup>-</sup><br>475.3775[M-H-2Glc] <sup>-</sup>                                                                                                                                                  | 621.4401[M-H-Glc] <sup>-</sup>                                             |          |          | Rg <sub>2</sub> isomer                                                                                                                  | C <sub>42</sub> H <sub>72</sub> O <sub>13</sub> | 784.4973  | L5、L15、<br>Y5、N5 | -5.23 |

|       |           |                                                                                                                                                                                                                                                                                                                                                                                                                                                  |                                                                              |                                                 |           |                  |       |
|-------|-----------|--------------------------------------------------------------------------------------------------------------------------------------------------------------------------------------------------------------------------------------------------------------------------------------------------------------------------------------------------------------------------------------------------------------------------------------------------|------------------------------------------------------------------------------|-------------------------------------------------|-----------|------------------|-------|
| 12.31 | 825.5011  | 825.4991[M-H] <sup>-</sup> 783.4947[M-H-Ac] <sup>-</sup> 765.4786[M-H-Ac-H <sub>2</sub> O] <sup>-</sup><br>663.4434[M-H-Glc] <sup>-</sup> 621.4706[M-H-Ac-Glc] <sup>-</sup> 459.3755[M-H-Ac-2Glc] <sup>-</sup>                                                                                                                                                                                                                                   | Rs <sub>3</sub> isomer                                                       | C <sub>44</sub> H <sub>74</sub> O <sub>14</sub> | 826.5079  | L5、L15、<br>Y5、N5 | -1.21 |
| 12.36 | 763.4303  | 763.4304[M-H-Xyl/Ara] 631.3865[M-H-Xyl/Ara] <sup>-</sup><br>455.3466[M-H-Xyl/Ara-GlcA] <sup>-</sup>                                                                                                                                                                                                                                                                                                                                              | 3-O-[R-L-Arabinopyranosyl(1f2)-β-D-glucuronopyranosyl] oleanolic acid isomer | C <sub>41</sub> H <sub>64</sub> O <sub>13</sub> | 764.4347  | L5、L15、<br>Y5、N5 | -4.45 |
| 12.4  | 929.5482  | 929.5522[M-H] <sup>-</sup> 767.5045[M-H-Glc] <sup>-</sup> 605.4526[M-H-2Glc] <sup>-</sup><br>459.3850[M-H-2Glc-Rha] <sup>-</sup>                                                                                                                                                                                                                                                                                                                 | Gypenoside X isomer                                                          | C <sub>48</sub> H <sub>82</sub> O <sub>17</sub> | 930.5552  | L5、L15、<br>Y5、N5 | -0.86 |
| 12.45 | 1119.5937 | 1119.6016[M-H] <sup>-</sup> 1077.5889[M-H-Ac] <sup>-</sup> 1059.5754[M-H-Ac-H <sub>2</sub> O] <sup>-</sup><br>945.5460[M-H-Ac-Xyl/Ara] <sup>-</sup> 927.5327[M-H-Ac-Xyl/Ara-H <sub>2</sub> O] <sup>-</sup><br>915.5334[M-H-Ac-Glc] <sup>-</sup> 783.4920[M-H-Ac-Glc-Xyl/Ara] <sup>-</sup><br>765.4832[M-H-Ac-Glc-Xyl/Ara-H <sub>2</sub> O] <sup>-</sup><br>621.4377[M-H-Ac-2Glc-Xyl/Ara] <sup>-</sup> 459.3698[M-H-Ac-3Glc-Xyl/Ara] <sup>-</sup> | Rs <sub>1</sub> isomer                                                       | C <sub>55</sub> H <sub>92</sub> O <sub>23</sub> | 1120.6029 | L5、L15、<br>Y5、N5 | 1.25  |
| 12.56 | 991.5505  | 991.5525[M+HCOO] <sup>-</sup> 945.5460[M-H] <sup>-</sup> 783.4973[M-H-Glc] <sup>-</sup><br>621.4388[M-H-2Glc] <sup>-</sup>                                                                                                                                                                                                                                                                                                                       | G-Rd                                                                         | C <sub>48</sub> H <sub>82</sub> O <sub>18</sub> | 946.5501  | L5、L15、<br>Y5、N5 | -3.91 |
| 12.68 | 1077.5874 | 1077.5859[M-H] <sup>-</sup> 945.5425[M-H-Xyl/Ara] <sup>-</sup> 783.4687[M-H-Xyl/Ara-Glc] <sup>-</sup><br>621.4494[M-H-Xyl/Ara-2Glc] <sup>-</sup> 459.3653[M-H-Xyl/Ara-3Glc] <sup>-</sup>                                                                                                                                                                                                                                                         | Rb <sub>1</sub> isomer                                                       | C <sub>53</sub> H <sub>90</sub> O <sub>21</sub> | 1078.5924 | L15、Y5、<br>N5    | -2.60 |
| 12.76 | 765.4793  | 765.4793[M-H] <sup>-</sup> 603.3942[M-H-Glc] <sup>-</sup> 441.3382[M-H-2Glc] <sup>-</sup>                                                                                                                                                                                                                                                                                                                                                        | G-Rk <sub>1</sub>                                                            | C <sub>42</sub> H <sub>70</sub> O <sub>12</sub> | 766.4867  | L5、L15、<br>Y5、N5 | -0.52 |
| 12.79 | 1149.6056 | 1149.6084[M-H] <sup>-</sup> 1107.5950[M-H-Ac] <sup>-</sup> 1089.5862[M-H-Ac-H <sub>2</sub> O] <sup>-</sup><br>945.5474[M-H-Ac-Glc] <sup>-</sup> 783.4985[M-H-Ac-2Glc] <sup>-</sup><br>621.4451[M-H-Ac-3Glc] <sup>-</sup> 459.3763[M-H-Ac-4Glc] <sup>-</sup>                                                                                                                                                                                      | Q-R <sub>1</sub> isomer                                                      | C <sub>56</sub> H <sub>94</sub> O <sub>24</sub> | 1150.6135 | L5、L15、<br>Y5、N5 | 0.09  |

|       |           |                                                                                                                                                                                                             |                                                                                                                                                                                                                                                                                      |                                                                                                                                                                                                                                                                                                        |                                                                                                                                                                                                                                                 |                                                 |           |                  |       |
|-------|-----------|-------------------------------------------------------------------------------------------------------------------------------------------------------------------------------------------------------------|--------------------------------------------------------------------------------------------------------------------------------------------------------------------------------------------------------------------------------------------------------------------------------------|--------------------------------------------------------------------------------------------------------------------------------------------------------------------------------------------------------------------------------------------------------------------------------------------------------|-------------------------------------------------------------------------------------------------------------------------------------------------------------------------------------------------------------------------------------------------|-------------------------------------------------|-----------|------------------|-------|
| 12.9  | 1119.5972 | 1119.6023[M-H] <sup>-</sup><br>C <sub>2</sub> H <sub>2</sub> O] <sup>-</sup>                                                                                                                                | 1077.5944[M-H-C <sub>2</sub> H <sub>2</sub> O] <sup>-</sup><br>1059.5786[M-H-Ac] <sup>-</sup>                                                                                                                                                                                        | 1077.6355[M-H-<br>C <sub>2</sub> H <sub>2</sub> O] <sup>-</sup>                                                                                                                                                                                                                                        | Rs <sub>2</sub>                                                                                                                                                                                                                                 | C <sub>55</sub> H <sub>92</sub> O <sub>23</sub> | 1120.6029 | L5、L15、<br>Y5、N5 | -1.88 |
| 12.9  | 1119.5972 | 1119.6023[M-H] <sup>-</sup><br>C <sub>2</sub> H <sub>2</sub> O] <sup>-</sup>                                                                                                                                | 1077.5944[M-H-C <sub>2</sub> H <sub>2</sub> O] <sup>-</sup><br>1059.5786[M-H-Ac] <sup>-</sup>                                                                                                                                                                                        | 1077.6355[M-H-<br>C <sub>2</sub> H <sub>2</sub> O] <sup>-</sup>                                                                                                                                                                                                                                        | Rs <sub>1</sub>                                                                                                                                                                                                                                 | C <sub>55</sub> H <sub>92</sub> O <sub>23</sub> | 1120.6029 | L5、L15、<br>Y5、N5 | -1.88 |
| 12.99 | 871.5036  | 871.5212[M+FA-H] <sup>-</sup><br>637.4444[M-H-Ac-Rha] <sup>-</sup>                                                                                                                                          | 825.5077[M-H] <sup>-</sup><br>475.3821[M-H-Ac-Rha-Glc] <sup>-</sup>                                                                                                                                                                                                                  | 783.4969[M-H-Ac] <sup>-</sup>                                                                                                                                                                                                                                                                          | β-D-Glucopyranoside, (3β,<br>6α,12β,20 <i>R</i> )-3,12,20-<br>trihydroxydammar-24-<br>en-6-yl 2- <i>O</i> -(6-deoxy-α-<br>L-mannopyranosyl)-, 6-<br>acetate isomer                                                                              | C <sub>44</sub> H <sub>74</sub> O <sub>14</sub> | 826.5079  | L5、L15、<br>Y5、N5 | -9.21 |
| 13    | 1047.5722 | 1047.5785[M-H] <sup>-</sup><br>783.4876[M-H-2Xyl/Ara] <sup>-</sup><br>459.4064[M-H-2Xyl/Ara-2Glc] <sup>-</sup>                                                                                              | 915.5464[M-H-Xyl/Ara] <sup>-</sup><br>621.4268[M-H-2Xyl/Ara-Glc] <sup>-</sup>                                                                                                                                                                                                        |                                                                                                                                                                                                                                                                                                        | Notoginsenoside O<br>isomer                                                                                                                                                                                                                     | C <sub>52</sub> H <sub>88</sub> O <sub>21</sub> | 1048.5818 | L5、L15、<br>Y5、N5 | 1.72  |
| 13.05 | 1175.6198 | 1175.6281[M-H] <sup>-</sup><br>C <sub>4</sub> H <sub>4</sub> O-H <sub>2</sub> O] <sup>-</sup><br>C <sub>4</sub> H <sub>4</sub> O-2Glc] <sup>-</sup><br>H-C <sub>4</sub> H <sub>4</sub> O-3Glc] <sup>-</sup> | 1107.6023[M-H-C <sub>4</sub> H <sub>4</sub> O] <sup>-</sup><br>945.5458[M-H-C <sub>4</sub> H <sub>4</sub> O-Glc] <sup>-</sup><br>765.4780[M-H-C <sub>4</sub> H <sub>4</sub> O-2Glc-H <sub>2</sub> O] <sup>-</sup><br>459.3930[M-H-C <sub>4</sub> H <sub>4</sub> O-4Glc] <sup>-</sup> | 1089.5882[M-H-<br>C <sub>4</sub> H <sub>4</sub> O-2Glc] <sup>-</sup><br>783.4935[M-H-<br>C <sub>4</sub> H <sub>4</sub> O-2Glc-H <sub>2</sub> O] <sup>-</sup><br>621.4361[M-<br>H-C <sub>4</sub> H <sub>4</sub> O-3Glc] <sup>-</sup><br>459.3930[M-H-C <sub>4</sub> H <sub>4</sub> O-4Glc] <sup>-</sup> | β-D-Glucopyranoside, (3β,<br>12β)-20-[(6- <i>O</i> -β-D-<br>glucopyranosyl-β-D-<br>glucopyranosyl)oxy]-<br>12-hydroxydammar-24-<br>en-3-yl 2- <i>O</i> -[6- <i>O</i> -[(2 <i>E</i> )-<br>1-oxo-2-buten-1-yl]-β-<br>D-glucopyranosyl]-<br>isomer | C <sub>58</sub> H <sub>96</sub> O <sub>24</sub> | 1176.6292 | L5、L15、<br>Y5、N5 | 1.36  |
| 13.18 | 945.5438  | 945.5491[M-H] <sup>-</sup>                                                                                                                                                                                  | 783.4911[M-H-Glc] <sup>-</sup><br>459.3912[M-H-3Glc] <sup>-</sup>                                                                                                                                                                                                                    | 621.4233[M-H-2Glc] <sup>-</sup>                                                                                                                                                                                                                                                                        | Rd isomer                                                                                                                                                                                                                                       | C <sub>48</sub> H <sub>82</sub> O <sub>18</sub> | 946.5501  | L5、L15、<br>Y5、N5 | -1.59 |
| 13.19 | 913.5175  | 913.5067[M+FA-H] <sup>-</sup><br>637.4354[M-H-C <sub>4</sub> H <sub>4</sub> O-Glc] <sup>-</sup>                                                                                                             | 867.5118[M-H] <sup>-</sup><br>475.3766[M-H-C <sub>4</sub> H <sub>4</sub> O-2Glc] <sup>-</sup>                                                                                                                                                                                        | 799.4870[M-H-C <sub>4</sub> H <sub>4</sub> O] <sup>-</sup>                                                                                                                                                                                                                                             | koryoginsenoside-<br>R <sub>1</sub> /isomer                                                                                                                                                                                                     | C <sub>46</sub> H <sub>76</sub> O <sub>15</sub> | 868.5184  | L5、L15、<br>Y5、N5 | -1.38 |

|       |           |                                                                                                                                                                                                                                                                                                                                                                                                                                                                                                                                                        |                                         |                                                 |           |              |       |
|-------|-----------|--------------------------------------------------------------------------------------------------------------------------------------------------------------------------------------------------------------------------------------------------------------------------------------------------------------------------------------------------------------------------------------------------------------------------------------------------------------------------------------------------------------------------------------------------------|-----------------------------------------|-------------------------------------------------|-----------|--------------|-------|
| 13.42 | 1145.6106 | 1145.6186[M-H] <sup>-</sup> 1077.5918[M-H-C <sub>4</sub> H <sub>4</sub> O] <sup>-</sup> 1059.5801[M-H-C <sub>4</sub> H <sub>4</sub> O-H <sub>2</sub> O] <sup>-</sup> 945.5450[M-H-C <sub>4</sub> H <sub>4</sub> O-Xyl/Ara] <sup>-</sup> 783.4872[M-H-C <sub>4</sub> H <sub>4</sub> O-Xyl/Ara-Glc] <sup>-</sup> 765.4993[M-H-C <sub>4</sub> H <sub>4</sub> O-Xyl/Ara-Glc-H <sub>2</sub> O] <sup>-</sup> 621.4356[M-H-C <sub>4</sub> H <sub>4</sub> O-Xyl/Ara-2Glc] <sup>-</sup> 459.3738[M-H-C <sub>4</sub> H <sub>4</sub> O-Xyl/Ara-3Glc] <sup>-</sup> | ginsenoside Ra <sub>7</sub> isomer      | C <sub>57</sub> H <sub>94</sub> O <sub>23</sub> | 1146.6186 | L5、L15、Y5、N5 | 0.17  |
| 13.45 | 1119.5962 | 1119.5975[M-H] <sup>-</sup> 1077.5926[M-H-Ac] <sup>-</sup> 1059.5864[M-H-Ac-H <sub>2</sub> O] <sup>-</sup> 945.5513[M-H-Ac-Xyl/Ara] <sup>-</sup> 915.5329[M-H-Ac-Glc] <sup>-</sup> 783.5016[M-H-Ac-Glc-Xyl/Ara] <sup>-</sup> 621.4504[M-H-Ac-2Glc-Xyl/Ara] <sup>-</sup> 459.5302[M-H-Ac-3Glc-Xyl/Ara] <sup>-</sup>                                                                                                                                                                                                                                     | Rs <sub>1</sub> isomer                  | C <sub>55</sub> H <sub>92</sub> O <sub>23</sub> | 1120.6029 | L5、L15、Y5、N5 | -0.98 |
| 13.49 | 969.5092  | 969.516[M-H] <sup>-</sup> 807.4603[M-H-Glc] <sup>-</sup> 609.3828[M-H-2Glc-2H <sub>2</sub> O] <sup>-</sup> 455.3540[M-H-2Glc-gluA-CH <sub>2</sub> ] <sup>-</sup>                                                                                                                                                                                                                                                                                                                                                                                       | G-Ro methyl ester                       | C <sub>48</sub> H <sub>76</sub> O <sub>19</sub> | 970.5137  | L5、L15、Y5、N5 | -3.40 |
| 13.57 | 827.4787  | 827.4883[M+FA-H] <sup>-</sup> 781.4707[M-H] <sup>-</sup> 619.4312[M-H-Glc] <sup>-</sup> 457.3872[M-H-2Glc] <sup>-</sup>                                                                                                                                                                                                                                                                                                                                                                                                                                | G-Rh <sub>15</sub> /isomer              | C <sub>42</sub> H <sub>70</sub> O <sub>13</sub> | 782.4816  | L5、L15、Y5、N5 | 3.97  |
| 13.77 | 827.4814  | 827.4802[M+HCOO] <sup>-</sup> 781.4798[M-H] <sup>-</sup> 619.4225[M-H-Glc] <sup>-</sup> 457.3717[M-H-2Glc] <sup>-</sup>                                                                                                                                                                                                                                                                                                                                                                                                                                | G-Rg <sub>9</sub>                       | C <sub>42</sub> H <sub>70</sub> O <sub>13</sub> | 782.4816  | L5、L15、Y5、N5 | -7.60 |
| 13.78 | 987.5549  | 987.5549[M-H] <sup>-</sup> 945.5439[M-H-Ac] <sup>-</sup> 927.5337[M-H-Ac-H <sub>2</sub> O] <sup>-</sup> 783.4908[M-H-Ac-Glc] <sup>-</sup> 765.4852[M-H-Ac-H <sub>2</sub> O-Glc] <sup>-</sup> 621.4333[M-H-Ac-2Glc] <sup>-</sup> 459.4046[M-H-Ac-3Glc] <sup>-</sup>                                                                                                                                                                                                                                                                                     | 6'''-O-acetylgypenoside XVII isomer     | C <sub>50</sub> H <sub>84</sub> O <sub>19</sub> | 988.5607  | L5、L15、Y5、N5 | -2.03 |
| 13.78 | 915.5343  | 915.5353[M-H] <sup>-</sup> 783.4908[M-H-Ara/Xyl] <sup>-</sup> 621.4370[M-H-Ara/Xyl-Glc] <sup>-</sup> 459.3812[M-H-Ara/Xyl-2Glc] <sup>-</sup>                                                                                                                                                                                                                                                                                                                                                                                                           | CS-III isomer                           | C <sub>47</sub> H <sub>80</sub> O <sub>17</sub> | 916.5396  | L5、L15、Y5、N5 | -2.73 |
| 13.81 | 913.5163  | 913.5406[M+FA-H] <sup>-</sup> 867.5107[M-H] <sup>-</sup> 799.4865[M-H-C <sub>4</sub> H <sub>4</sub> O] <sup>-</sup> 781.4857[M-H-C <sub>4</sub> H <sub>4</sub> O-H <sub>2</sub> O] <sup>-</sup> 637.4456[M-H-C <sub>4</sub> H <sub>4</sub> O-Glc] <sup>-</sup> 571.4121 475.3700[M-H-C <sub>4</sub> H <sub>4</sub> O-2Glc]                                                                                                                                                                                                                             | koryoginsenoside-R <sub>1</sub> /isomer | C <sub>46</sub> H <sub>76</sub> O <sub>15</sub> | 868.5184  | L5、N5        | -0.12 |
| 13.89 | 637.4332  | 637.4349[M-H] <sup>-</sup> 475.3828[M-H-Glc] <sup>-</sup>                                                                                                                                                                                                                                                                                                                                                                                                                                                                                              | G-Rh <sub>19</sub>                      | C <sub>36</sub> H <sub>62</sub> O <sub>9</sub>  | 638.4394  | L5、L15、Y5、N5 | -2.51 |

|       |          |                                                                                                                                                                                                                                                                                                                                                                                                                                                                                           |                                                                                                        |                                                 |           |                  |       |
|-------|----------|-------------------------------------------------------------------------------------------------------------------------------------------------------------------------------------------------------------------------------------------------------------------------------------------------------------------------------------------------------------------------------------------------------------------------------------------------------------------------------------------|--------------------------------------------------------------------------------------------------------|-------------------------------------------------|-----------|------------------|-------|
| 14.08 | 807.4911 | 807.4943[M-H] <sup>-</sup> 765.4824[M-H-Ac] <sup>-</sup> 747.4726[M-H-Ac-H <sub>2</sub> O] <sup>-</sup><br>603.4296[M-H-Ac-Glc] <sup>-</sup> 441.3694[M-H-Ac-2Glc] <sup>-</sup>                                                                                                                                                                                                                                                                                                           | Rs <sub>4</sub> isomer                                                                                 | C <sub>44</sub> H <sub>72</sub> O <sub>13</sub> | 808.4973  | L5、L15、<br>Y5、N5 | -1.98 |
| 14.1  | 783.4914 | 783.4913[M-H] <sup>-</sup> 621.4361[M-H-Glc] <sup>-</sup>                                                                                                                                                                                                                                                                                                                                                                                                                                 | DHDGG                                                                                                  | C <sub>42</sub> H <sub>72</sub> O <sub>13</sub> | 784.4973  | L5、L15           | -2.43 |
| 14.26 | 987.5523 | 987.5542[M-H] <sup>-</sup> 945.5451[M-H-Ac] <sup>-</sup> 927.5273[M-H-Ac-H <sub>2</sub> O] <sup>-</sup><br>783.4858[M-H-Ac-Glc] <sup>-</sup> 765.4884[M-H-Ac-Glc-H <sub>2</sub> O] <sup>-</sup><br>621.4309[M-H-Ac-Glc-Glc] <sup>-</sup> 459.3818[M-H-Ac-Glc-Glc-Glc] <sup>-</sup>                                                                                                                                                                                                        | 6'''-O-acetylgypenoside<br>XVII isomer                                                                 | C <sub>50</sub> H <sub>84</sub> O <sub>19</sub> | 988.5607  | L5、L15、<br>Y5、N5 | 0.61  |
| 14.39 | 811.4871 | 811.4896[M+HCOO] <sup>-</sup> 765.4833[M-H] <sup>-</sup> 619.4246[M-H-Rha] <sup>-</sup><br>457.3736[M-H-Rha-Glc] <sup>-</sup>                                                                                                                                                                                                                                                                                                                                                             | G-Rg <sub>6</sub>                                                                                      | C <sub>42</sub> H <sub>70</sub> O <sub>12</sub> | 766.4867  | L5、L15、<br>Y5、N5 | -5.75 |
| 14.39 | 765.4814 | 765.482[M-H] <sup>-</sup> 619.4232[M-H-Rha] <sup>-</sup>                                                                                                                                                                                                                                                                                                                                                                                                                                  | G-F <sub>4</sub>                                                                                       | C <sub>42</sub> H <sub>70</sub> O <sub>12</sub> | 766.4867  | L5、L15、<br>Y5、N5 | -3.27 |
| 14.46 | 797.4706 | 751.4951[M-H] <sup>-</sup> 797.4733[M+HCOO] <sup>-</sup> 619.4275[M-H-Xyl] <sup>-</sup>                                                                                                                                                                                                                                                                                                                                                                                                   | DHDXG                                                                                                  | C <sub>42</sub> H <sub>72</sub> O <sub>11</sub> | 752.5075  | L5、L15、<br>Y5、N5 | 6.12  |
| 14.5  | 807.4544 | 645.4015[M-H-Glc] <sup>-</sup> 807.4582[M-H] <sup>-</sup>                                                                                                                                                                                                                                                                                                                                                                                                                                 | CS-Iva methyl ester                                                                                    | C <sub>43</sub> H <sub>68</sub> O <sub>14</sub> | 808.4609  | L5、L15、<br>Y5    | -1.61 |
| 14.5  | 725.4486 | 725.4466[M+FA-H] <sup>-</sup> 679.4402[M-H] <sup>-</sup> 637.4289[M-H-Ac] <sup>-</sup><br>475.3965[M-H-Ac-Glc] <sup>-</sup>                                                                                                                                                                                                                                                                                                                                                               | β-D-Glucopyranoside, (3β,<br>6α,12β,20S)-6-(acetyloxy)<br>-3,12-dihydroxydammar-<br>24-en-20-yl isomer | C <sub>38</sub> H <sub>64</sub> O <sub>10</sub> | 680.4499  | L5、L15、<br>Y5、N5 | 2.80  |
| 14.68 | 1059.577 | 1059.5753[M+FA-H] <sup>-</sup> 1013.5717[M-H] <sup>-</sup> 945.5444[M-H-C <sub>4</sub> H <sub>4</sub> O] <sup>-</sup><br>927.5337[M-H-C <sub>4</sub> H <sub>4</sub> O-H <sub>2</sub> O] <sup>-</sup> 783.4901[M-H-C <sub>4</sub> H <sub>4</sub> O-Glc] <sup>-</sup><br>765.4861[M-H-C <sub>4</sub> H <sub>4</sub> O-Glc-H <sub>2</sub> O] <sup>-</sup> 621.4401[M-H-C <sub>4</sub> H <sub>4</sub> O-2Glc] <sup>-</sup><br>459.3767[M-H-C <sub>4</sub> H <sub>4</sub> O-3Glc] <sup>-</sup> | Quinquenoside I isomer                                                                                 | C <sub>52</sub> H <sub>86</sub> O <sub>19</sub> | 1014.5763 | L5、L15、<br>Y5、N5 | -3.16 |
| 14.68 | 975.5552 | 975.5552[M+FA-H] <sup>-</sup> 929.5511[M-H] <sup>-</sup> 783.4878[M-H-Rha] <sup>-</sup><br>621.4535[M-H-Rha-Glc] <sup>-</sup> 459.3782[M-H-Rha-Glc-Glc] <sup>-</sup>                                                                                                                                                                                                                                                                                                                      | Gypenoside X isomer                                                                                    | C <sub>48</sub> H <sub>82</sub> O <sub>17</sub> | 930.5552  | L5、L15、<br>Y5、N5 | -3.98 |
| 14.68 | 811.4877 | 811.4762[M+FA-H] <sup>-</sup> 765.4814[M-H] <sup>-</sup> 619.4101[M-H-Rha] <sup>-</sup><br>457.3726[M-H-Rha-Glc] <sup>-</sup>                                                                                                                                                                                                                                                                                                                                                             | G-Rg <sub>6</sub> isomer                                                                               | C <sub>42</sub> H <sub>70</sub> O <sub>12</sub> | 766.4867  | L5、L15、<br>Y5、N5 | -3.27 |

|       |           |                                                                                 |                                                                 |                                                                                                                               |                                                 |           |                  |       |
|-------|-----------|---------------------------------------------------------------------------------|-----------------------------------------------------------------|-------------------------------------------------------------------------------------------------------------------------------|-------------------------------------------------|-----------|------------------|-------|
| 14.83 | 665.4286  | 665.4299[M+HCOO] <sup>-</sup>                                                   | 619.4241[M-H] <sup>-</sup>                                      | G-Rk <sub>3</sub>                                                                                                             | C <sub>36</sub> H <sub>60</sub> O <sub>8</sub>  | 620.4288  | L5、L15、<br>Y5、N5 | -5.00 |
| 14.83 | 665.4286  | 665.4299[M+HCOO] <sup>-</sup>                                                   | 619.4241[M-H] <sup>-</sup>                                      | G-Rh <sub>4</sub>                                                                                                             | C <sub>36</sub> H <sub>60</sub> O <sub>8</sub>  | 620.4288  | L5、L15、<br>Y5、N5 | -5.00 |
| 14.98 | 783.491   | 783.4913[M-H] <sup>-</sup>                                                      | 621.4361[M-H-Glc] <sup>-</sup>                                  | G-F <sub>2</sub>                                                                                                              | C <sub>42</sub> H <sub>72</sub> O <sub>13</sub> | 784.4973  | L5、L15、<br>Y5、N5 | -1.91 |
| 15.34 | 827.4784  | 827.4749[M+FA-H] <sup>-</sup>                                                   | 781.4764[M-H] <sup>-</sup>                                      | G-Rh <sub>15</sub> /isomer                                                                                                    | C <sub>42</sub> H <sub>70</sub> O <sub>13</sub> | 782.4816  | L5、L15、<br>Y5、N5 | -3.33 |
|       |           | 457.3858[M-H-2Glc] <sup>-</sup>                                                 | 619.4216[M-H-Glc] <sup>-</sup>                                  |                                                                                                                               |                                                 |           |                  |       |
| 15.39 | 1013.5701 | 1013.5723[M-H] <sup>-</sup>                                                     | 945.5463[M-H-C <sub>4</sub> H <sub>4</sub> O] <sup>-</sup>      | Quinquenoside I isomer                                                                                                        | C <sub>52</sub> H <sub>86</sub> O <sub>19</sub> | 1014.5763 | L5、L15、<br>Y5、N5 | -1.58 |
|       |           | 927.5273[M-H-C <sub>4</sub> H <sub>4</sub> O-H <sub>2</sub> O] <sup>-</sup>     | 783.4935[M-H-C <sub>4</sub> H <sub>4</sub> O-Glc] <sup>-</sup>  |                                                                                                                               |                                                 |           |                  |       |
|       |           | 765.4950[M-H-C <sub>4</sub> H <sub>4</sub> O-Glc-H <sub>2</sub> O] <sup>-</sup> | 621.4445[M-H-C <sub>4</sub> H <sub>4</sub> O-2Glc] <sup>-</sup> | Diacetyl-G-Rd isomer                                                                                                          | C <sub>52</sub> H <sub>86</sub> O <sub>20</sub> | 1030.5712 | L5、L15、<br>Y5、N5 | -1.26 |
| 15.6  | 1029.5647 | 459.3787[M-H-C <sub>4</sub> H <sub>4</sub> O-3Glc] <sup>-</sup>                 | 987.5458[M-H-Ac] <sup>-</sup>                                   |                                                                                                                               |                                                 |           |                  |       |
|       |           | 945.5502[M-H-2Ac] <sup>-</sup>                                                  | 783.5046[M-H-2Ac-Glc] <sup>-</sup>                              | β-D-Glucopyranoside, (3β,<br>12β)-3-(β-D-glucopyranosyloxy)-12-hydroxydammar-24-en-20-yl, 6-(2 <i>E</i> )-2-butenolate isomer | C <sub>46</sub> H <sub>76</sub> O <sub>14</sub> | 852.5235  | L15、Y5           | 6.69  |
| 16.16 | 851.51    | 851.5100[M-H] <sup>-</sup>                                                      | 783.4875[M-H-C <sub>4</sub> H <sub>4</sub> O] <sup>-</sup>      |                                                                                                                               |                                                 |           |                  |       |
|       |           | 621.4525[M-H-C <sub>4</sub> H <sub>4</sub> O-Glc] <sup>-</sup>                  | 459.3966[M-H-C <sub>4</sub> H <sub>4</sub> O-2Glc] <sup>-</sup> | 20(S)-G-Rg <sub>3</sub>                                                                                                       | C <sub>42</sub> H <sub>72</sub> O <sub>13</sub> | 784.4973  | L5、L15、<br>Y5、N5 | -3.83 |
| 16.18 | 783.4925  | 783.4947[M-H] <sup>-</sup>                                                      | 621.4389[M-H-Glc] <sup>-</sup>                                  | 20(R)-G-Rg <sub>3</sub>                                                                                                       | C <sub>42</sub> H <sub>72</sub> O <sub>13</sub> | 784.4973  | L5、L15、<br>Y5、N5 | -3.83 |
| 16.18 | 783.4925  | 783.4947[M-H] <sup>-</sup>                                                      | 621.4389[M-H-Glc] <sup>-</sup>                                  |                                                                                                                               |                                                 |           |                  |       |

|       |          |                                                                                                                                                                                                            |                            |                                                 |          |                  |       |
|-------|----------|------------------------------------------------------------------------------------------------------------------------------------------------------------------------------------------------------------|----------------------------|-------------------------------------------------|----------|------------------|-------|
| 16.46 | 829.4954 | 829.5001[M+FA-H] <sup>-</sup> 783.4931[M-H] <sup>-</sup> 621.4475[M-H-Glc] <sup>-</sup><br>459.3833[M-H-2Glc] <sup>-</sup>                                                                                 | F <sub>2</sub> isomer      | C <sub>42</sub> H <sub>72</sub> O <sub>13</sub> | 784.4973 | L5、L15、<br>Y5、N5 | -4.59 |
| 16.97 | 459.3845 | 459.3845[M+H] <sup>+</sup> 441.3741[M+H-H <sub>2</sub> O] <sup>+</sup>                                                                                                                                     | DEDT                       | C <sub>30</sub> H <sub>50</sub> O <sub>3</sub>  | 458.376  | L5、L15、<br>Y5、N5 | -1.52 |
| 17.01 | 475.3787 | 475.3786[M-H] <sup>-</sup> 391.2836[M-H-C <sub>6</sub> H <sub>12</sub> ] <sup>-</sup>                                                                                                                      | 20(S)-PPT                  | C <sub>30</sub> H <sub>52</sub> O <sub>4</sub>  | 476.3866 | L5、L15、<br>Y5、N5 | 0.21  |
| 17.01 | 475.3787 | 475.3786[M-H] <sup>-</sup> 391.2836[M-H-C <sub>6</sub> H <sub>12</sub> ] <sup>-</sup>                                                                                                                      | 20(R)-PPT                  | C <sub>30</sub> H <sub>52</sub> O <sub>4</sub>  | 476.3866 | L5、L15、<br>Y5、N5 | 0.21  |
| 17.18 | 799.4847 | 799.4891[M+FA-H] <sup>-</sup> 753.4784[M-H] <sup>-</sup> 621.4433[M-H-<br>Xyl/Ara] <sup>-</sup> 459.3814[M-H-Xyl/Ara-Glc] <sup>-</sup>                                                                     | G-C-Y isomer               | C <sub>41</sub> H <sub>70</sub> O <sub>12</sub> | 754.4867 | L5、L15、<br>Y5、N5 | 0.66  |
| 17.35 | 827.4803 | 827.4759[M+FA-H] <sup>-</sup> 781.4773[M-H] <sup>-</sup> 619.4345[M-H-Glc] <sup>-</sup><br>457.3735[M-H-2Glc] <sup>-</sup>                                                                                 | G-Rh <sub>15</sub> /isomer | C <sub>42</sub> H <sub>70</sub> O <sub>13</sub> | 782.4816 | L5、L15、<br>Y5、N5 | -4.48 |
| 17.55 | 799.4844 | 799.4859[M+FA-H] <sup>-</sup> 753.4824[M-H] <sup>-</sup> 621.4417[M-H-<br>Xyl/Ara] <sup>-</sup> 459.3995[M-H-Xyl/Ara-Glc] <sup>-</sup>                                                                     | G-C-Y isomer               | C <sub>41</sub> H <sub>70</sub> O <sub>12</sub> | 754.4867 | L5、Y5、<br>N5     | -4.65 |
| 17.7  | 871.5045 | 871.5041[M+FA-H] <sup>-</sup> 825.4979[M-H] <sup>-</sup> 783.4866[M-H-Ac] <sup>-</sup><br>621.4428[M-H-Ac-Glc] <sup>-</sup> 459.3854[M-H-Ac-Glc-Glc]                                                       | Rs <sub>3</sub> isomer     | C <sub>44</sub> H <sub>74</sub> O <sub>14</sub> | 826.5079 | L5、Y5、<br>N5     | 2.67  |
| 18.33 | 871.5073 | 871.4739[M+HCOO] <sup>-</sup> 825.5006[M-H] <sup>-</sup> 783.4949[M-H-<br>C <sub>2</sub> H <sub>2</sub> O] 765.4761[M-H-Ac] <sup>-</sup> 621.4482[M-H-Glc] <sup>-</sup><br>459.3823[M-H-2Glc] <sup>-</sup> | 20(S)-G-Rs <sub>3</sub>    | C <sub>44</sub> H <sub>74</sub> O <sub>14</sub> | 826.5079 | L5、L15、<br>Y5、N5 | -0.61 |
| 18.33 | 871.5073 | 871.4739[M+HCOO] <sup>-</sup> 825.5006[M-H] <sup>-</sup> 783.4949[M-H-<br>C <sub>2</sub> H <sub>2</sub> O] 765.4761[M-H-Ac] <sup>-</sup> 621.4482[M-H-Glc] <sup>-</sup><br>459.3823[M-H-2Glc] <sup>-</sup> | 20(R)-G-Rs <sub>3</sub>    | C <sub>44</sub> H <sub>74</sub> O <sub>14</sub> | 826.5079 | L5、L15、<br>Y5、N5 | -0.61 |
| 18.44 | 807.4548 | 807.4572[M-H] <sup>-</sup> 609.3828[M-H-Glc-2H <sub>2</sub> O] <sup>-</sup> 537.3592<br>455.3544[M-H-GlcA-6'-O-Me-Glc]                                                                                     | ZB-RI-6' methyl ester      | C <sub>43</sub> H <sub>68</sub> O <sub>14</sub> | 808.4609 | L15              | -2.11 |
| 18.44 | 807.4889 | 807.4889[M-H] <sup>-</sup> 609.3828[M-H-Glc-2H <sub>2</sub> O] <sup>-</sup>                                                                                                                                | Rs <sub>4</sub>            | C <sub>44</sub> H <sub>72</sub> O <sub>13</sub> | 808.4973 | L15              | 0.74  |

|       |          |                                                                 |                                                                      |                                                                                      |                                                 |          |                  |        |
|-------|----------|-----------------------------------------------------------------|----------------------------------------------------------------------|--------------------------------------------------------------------------------------|-------------------------------------------------|----------|------------------|--------|
| 18.45 | 797.4658 | 797.4840[M+FA-H] <sup>-</sup><br>Xyl/Ara] <sup>-</sup>          | 751.4632[M-H] <sup>-</sup><br>457.3681[M-H-Xyl/Ara-Glc] <sup>-</sup> | 619.4250[M-H-<br>noto-T <sub>5</sub> isomer                                          | C <sub>41</sub> H <sub>68</sub> O <sub>12</sub> | 752.4711 | L5、L15、<br>Y5、N5 | 0.13   |
| 19.06 | 663.4096 | 663.4111[M+FA-H] <sup>-</sup>                                   | 617.4134[M-H] <sup>-</sup>                                           | 455.3506[M-H-Glc] <sup>-</sup><br>Oleanolic acid-28-O-β-D-<br>glucopyranoside/isomer | C <sub>36</sub> H <sub>58</sub> O <sub>8</sub>  | 618.4132 | L5、L15、<br>Y5、N5 | -12.96 |
| 19.07 | 665.4161 | 665.4419[M+FA-H] <sup>-</sup>                                   | 619.4148[M-H] <sup>-</sup>                                           | 457.3730[M-H-Glc] <sup>-</sup><br>G-Rh <sub>4</sub> isomer                           | C <sub>36</sub> H <sub>60</sub> O <sub>8</sub>  | 620.4288 | N5               | 10.00  |
| 19.9  | 667.4459 | 621.4392[M-H] <sup>-</sup>                                      | 459.3852[M-H-Glc] <sup>-</sup>                                       | G-C-K                                                                                | C <sub>36</sub> H <sub>62</sub> O <sub>8</sub>  | 622.4445 | L5、L15、<br>Y5、N5 | -4.02  |
| 19.93 | 765.4815 | 765.4820[M-H] <sup>-</sup>                                      | 603.4280[M-H-Glc] <sup>-</sup>                                       | 441.3389[M-H-2Glc] <sup>-</sup><br>G-Rg <sub>5</sub>                                 | C <sub>42</sub> H <sub>70</sub> O <sub>12</sub> | 766.4867 | L5、L15、<br>Y5、N5 | -3.40  |
| 20.06 | 667.4412 | 667.4391[M+FA-H] <sup>-</sup>                                   | 621.4330[M-H] <sup>-</sup>                                           | 459.3945[M-H-Glc] <sup>-</sup><br>G-C-K isomer                                       | C <sub>36</sub> H <sub>62</sub> O <sub>8</sub>  | 622.4445 | L5、L15、<br>Y5    | 5.95   |
| 20.68 | 649.346  | 649.3596[M+FA-H] <sup>-</sup>                                   | 603.4193[M-H] <sup>-</sup>                                           | 441.2927[M-H-Glc] <sup>-</sup><br>Rh <sub>3</sub> isomer                             | C <sub>36</sub> H <sub>60</sub> O <sub>7</sub>  | 604.4339 | L5、L15、<br>Y5、N5 | 0.33   |
| 21.02 | 621.4371 | 621.4382[M-H] <sup>-</sup>                                      | 459.3831[M-H-Glc] <sup>-</sup>                                       | 20(S)-G-Rh <sub>2</sub>                                                              | C <sub>36</sub> H <sub>62</sub> O <sub>8</sub>  | 622.4445 | L5、L15、<br>Y5、N5 | -0.64  |
| 21.02 | 621.4371 | 621.4382[M-H] <sup>-</sup>                                      | 459.3831[M-H-Glc] <sup>-</sup>                                       | 20(S)-G-Rh <sub>2</sub>                                                              | C <sub>36</sub> H <sub>62</sub> O <sub>8</sub>  | 622.4445 | L5、L15、<br>Y5、N5 | -0.64  |
| 21.29 | 665.4263 | 665.4260[M+FA-H] <sup>-</sup>                                   | 619.4224[M-H] <sup>-</sup>                                           | 457.3760[M-H-Glc] <sup>-</sup><br>G-Rh <sub>4</sub> isomer                           | C <sub>36</sub> H <sub>60</sub> O <sub>8</sub>  | 620.4288 | L5、L15、<br>Y5、N5 | -2.26  |
| 21.68 | 459.3819 | 459.3819[M+H] <sup>+</sup>                                      | 441.3741[M+H-H <sub>2</sub> O] <sup>+</sup>                          | DDT                                                                                  | C <sub>30</sub> H <sub>50</sub> O <sub>3</sub>  | 458.376  | L5、L15、<br>Y5、N5 | 4.14   |
| 21.91 | 807.4905 | 807.4898[M-H] <sup>-</sup><br>603.4212[M-H-Ac-Glc] <sup>-</sup> | 765.4821[M-H-Ac]<br>441.3721[M-H-Ac-2Glc]                            | 747.4694[M-H-Ac-H <sub>2</sub> O] <sup>-</sup><br>Rs <sub>4</sub> isomer             | C <sub>44</sub> H <sub>72</sub> O <sub>13</sub> | 808.4973 | L5、L15、<br>Y5    | -1.24  |
| 23.72 | 649.4337 | 649.4332[M+HCOO] <sup>-</sup>                                   | 603.4311[M-H] <sup>-</sup>                                           | G-Rh <sub>3</sub>                                                                    | C <sub>36</sub> H <sub>60</sub> O <sub>7</sub>  | 604.4339 | L5、L15、<br>Y5、N5 | -8.29  |

|       |          |                               |                            |                   |                                                |          |                  |       |
|-------|----------|-------------------------------|----------------------------|-------------------|------------------------------------------------|----------|------------------|-------|
| 23.72 | 649.4337 | 649.4332[M+HCOO] <sup>-</sup> | 603.4311[M-H] <sup>-</sup> | G-Rk <sub>2</sub> | C <sub>36</sub> H <sub>60</sub> O <sub>7</sub> | 604.4339 | L5、L15、<br>Y5、N5 | -8.29 |
| 25.54 | 505.3891 | 505.3847[M+HCOO] <sup>-</sup> | 459.3830[M-H] <sup>-</sup> | 20(S)-PPD         | C <sub>30</sub> H <sub>52</sub> O <sub>3</sub> | 460.3916 | L5、L15、<br>Y5、N5 | 1.74  |
| 25.54 | 505.3891 | 505.3847[M+HCOO] <sup>-</sup> | 459.3830[M-H] <sup>-</sup> | 20(S)-PPD         | C <sub>30</sub> H <sub>52</sub> O <sub>3</sub> | 460.3916 | L5、L15、<br>Y5、N5 | 1.74  |

**Table S2** MS and MS/MS of the 75 potential new ginsenosides

| No | RT   | Found Mass | MS/MS                                                                                                                                                                                                                                                                                                      | Identification                        | Name               | Formula                                         | Theoretical Mass<br>(Da) | Sources      | Error (ppm) |
|----|------|------------|------------------------------------------------------------------------------------------------------------------------------------------------------------------------------------------------------------------------------------------------------------------------------------------------------------|---------------------------------------|--------------------|-------------------------------------------------|--------------------------|--------------|-------------|
| 1  | 1.39 | 973.5384   | 973.5392[M-H] <sup>-</sup> 931.5222[M-H-Ac] <sup>-</sup> 913.5125[M-H-Ac-H <sub>2</sub> O] <sup>-</sup><br>799.4752[M-H-Ac-Xyl/Ara] <sup>-</sup> 637.4390[M-H-Ac-Xyl/Ara-Glc] <sup>-</sup><br>475.3570[M-H-Ac-Xyl/Ara-2Glc] <sup>-</sup>                                                                   | PPT-Glc-Glc-<br>Xyl/Ara-acetyl        | acetyl-NG-<br>R1A  | C <sub>49</sub> H <sub>82</sub> O <sub>19</sub> | 974.545                  | L5,L15,Y5    | -1.23       |
| 2  | 1.4  | 1017.527   | 1017.5282[M-H] <sup>-</sup> 973.5391[M-H-CO <sub>2</sub> ] <sup>-</sup> 931.5300[M-H-CO <sub>2</sub> -Ac] <sup>-</sup><br>799.4940[M-H-CO <sub>2</sub> -Ac-Xyl/Ara] <sup>-</sup> 637.4293[M-H-CO <sub>2</sub> -Ac-Xyl/Ara-Glc] <sup>-</sup><br>475.3634[M-H-CO <sub>2</sub> -Ac-Xyl/Ara-2Glc] <sup>-</sup> | PPT-Glc-Glc-<br>Xyl/Ara-malonyl       | malonyl-<br>NG-R1  | C <sub>50</sub> H <sub>82</sub> O <sub>21</sub> | 1018.5349                | L5,L15,Y5,N5 | 0.10        |
| 3  | 1.48 | 739.4243   | 739.3379[M-H] <sup>-</sup> 695.4553[M-H-CO <sub>2</sub> ] <sup>-</sup> 653.4397[M-H-CO <sub>2</sub> -Ac] <sup>-</sup><br>635.4165[M-H-CO <sub>2</sub> -Ac-H <sub>2</sub> O] <sup>-</sup> 491.3845[M-H-CO <sub>2</sub> -Ac-Glc] <sup>-</sup>                                                                | PG-Glc-malonyl                        | malonyl-<br>PG-RT5 | C <sub>39</sub> H <sub>64</sub> O <sub>13</sub> | 740.4347                 | N5           | 3.52        |
| 4  | 1.5  | 961.5377   | 961.5370[M-H] <sup>-</sup> 799.4818[M-H-Glc] <sup>-</sup> 781.4803[M-H-Glc-H <sub>2</sub> O] <sup>-</sup><br>653.4289[M-H-Glc-Rha] <sup>-</sup> 491.3668[M-H-2Glc-Rha]                                                                                                                                     | PG-Glc-Glc-Rha                        | PG-F11-G1          | C <sub>48</sub> H <sub>82</sub> O <sub>19</sub> | 962.545                  | L5,L15,Y5,N5 | -0.52       |
| 5  | 1.54 | 913.5142   | 913.5169[M-H] <sup>-</sup> 781.4893[M-H-Xyl/Ara] <sup>-</sup> 619.4175[M-H-Xyl/Ara-Glc] <sup>-</sup><br>457.3573[M-H-Xyl/Ara-2Glc] <sup>-</sup>                                                                                                                                                            | PPT-C17-<br>V1/V2-Glc-Glc-<br>Xyl/Ara | DHDXG-G1           | C <sub>47</sub> H <sub>78</sub> O <sub>17</sub> | 914.5239                 | L15          | 2.08        |

|    |      |           |                                                                                                                                                                                                                                                                                                                                                                                |                                 |                         |                                                 |           |              |       |
|----|------|-----------|--------------------------------------------------------------------------------------------------------------------------------------------------------------------------------------------------------------------------------------------------------------------------------------------------------------------------------------------------------------------------------|---------------------------------|-------------------------|-------------------------------------------------|-----------|--------------|-------|
| 6  | 1.69 | 1047.5372 | 1047.4597[M-H] <sup>-</sup> 1003.5481[M-H-CO <sub>2</sub> ] <sup>-</sup> 961.5407[M-H-CO <sub>2</sub> -Ac] <sup>-</sup><br>943.5309[M-H-CO <sub>2</sub> -Ac-H <sub>2</sub> O] <sup>-</sup> 799.4768[M-H-CO <sub>2</sub> -Ac-Glc] <sup>-</sup> 637.4257[M-H-CO <sub>2</sub> -Ac-Glc-Glc] <sup>-</sup> 475.3680[M-H-CO <sub>2</sub> -Ac-3Glc] <sup>-</sup>                       | PPT-Glc-Glc-Glc-malonyl         | malonyl-Re2-A           | C <sub>51</sub> H <sub>84</sub> O <sub>22</sub> | 1048.5454 | L5,Y5,N5     | 0.38  |
| 7  | 1.9  | 927.5     | 927.5353[M-H] <sup>-</sup> 883.4862[M-H-CO <sub>2</sub> ] <sup>-</sup> 841.4944[M-H-CO <sub>2</sub> -Ac] <sup>-</sup><br>799.5072[M-H-CO <sub>2</sub> -2Ac] <sup>-</sup> 781.4763[M-H-CO <sub>2</sub> -2Ac-H <sub>2</sub> O] <sup>-</sup> 637.4274[M-H-CO <sub>2</sub> -2Ac-Glc] <sup>-</sup> 475.3788[M-H-CO <sub>2</sub> -2Ac-2Glc] <sup>-</sup>                             | PPT-Glc-Glc-malonyl-acetyl      | malonyl-acetyl-Rg1A     | C <sub>47</sub> H <sub>76</sub> O <sub>18</sub> | 928.5032  | L5,L15,Y5,N5 | -4.96 |
| 8  | 1.9  | 927.5306  | 927.5353[M-H] <sup>-</sup> 799.5072[M-H-Rha+H <sub>2</sub> O] <sup>-</sup> 781.4763[M-H-Rha] <sup>-</sup><br>637.4274[M-H-Rha-Glc+H <sub>2</sub> O] <sup>-</sup> 619.4185[M-H-Rha-Glc] <sup>-</sup> 475.3788[M-H-Rha-Glc-Glc+H <sub>2</sub> O] <sup>-</sup>                                                                                                                    | PPT-C17-V1-Glc-Glc-Rha          | Rg6-G1                  | C <sub>48</sub> H <sub>80</sub> O <sub>17</sub> | 928.5396  | L5,L15,Y5,N5 | 1.29  |
| 9  | 2.02 | 953.5194  | 953.5194[M-H] <sup>-</sup> 909.4709[M-H-CO <sub>2</sub> ] <sup>-</sup> 867.4609[M-H-CO <sub>2</sub> -Ac] <sup>-</sup><br>799.4744[M-H-CO <sub>2</sub> -Ac-C <sub>4</sub> H <sub>4</sub> O] <sup>-</sup> 637.4358[M-H-CO <sub>2</sub> -Ac-C <sub>4</sub> H <sub>4</sub> O-Glc] <sup>-</sup> 475.3771[M-H-CO <sub>2</sub> -Ac-C <sub>4</sub> H <sub>4</sub> O-2Glc] <sup>-</sup> | PPT-Glc-Glc-malonyl-butene acyl | malonyl-butene acyl-Rg1 | C <sub>49</sub> H <sub>78</sub> O <sub>18</sub> | 954.5188  | L5,L15,Y5,N5 | -8.81 |
| 10 | 2.36 | 929.5391  | 929.5237[M-H] <sup>-</sup> 783.4800[M-H-Rha] <sup>-</sup> 621.4264[M-H-Rha-Glc] <sup>-</sup><br>475.4109[M-H-Rha-Glc-Rha] <sup>-</sup>                                                                                                                                                                                                                                         | PPT-Rha-Glc-Rha                 | Rg2-G1                  | C <sub>48</sub> H <sub>82</sub> O <sub>17</sub> | 930.5552  | N5           | 8.93  |
| 11 | 2.48 | 961.5352  | 961.5350[M-H] <sup>-</sup> 815.4813[M-H-Rha] <sup>-</sup> 653.4181[M-H-Rha-Glc] <sup>-</sup><br>491.3826[M-H-Rha-Glc-Glc] <sup>-</sup>                                                                                                                                                                                                                                         | PG-Glc-Glc-Rha                  | PG-F11-G2               | C <sub>48</sub> H <sub>82</sub> O <sub>19</sub> | 962.545   | L5,Y5,N5     | 2.08  |
| 12 | 3.36 | 1139.5866 | 1139.5807[M+FA-H] <sup>-</sup> 1093.5745[M-H] <sup>-</sup> 961.5355[M-H-Ara/Xyl] <sup>-</sup><br>815.4787[M-H-Xyl/Ara-Rha] <sup>-</sup> 653.4234[M-H-Xyl/Ara-Rha-Glc] <sup>-</sup> 491.3770[M-H-Xyl/Ara-Rha-2Glc] <sup>-</sup>                                                                                                                                                 | PG-Glc-Glc-Xyl/Ara-Rha          | PG-F11-GX1              | C <sub>53</sub> H <sub>90</sub> O <sub>23</sub> | 1094.5873 | L15,Y5,N5    | 4.57  |
| 13 | 4.68 | 833.4806  | 833.4836[M+FA-H] <sup>-</sup> 787.4791[M-H] <sup>-</sup> 655.4330[M-H-Xyl/Ara] <sup>-</sup><br>493.3797[M-H-Xyl/Ara-Glc] <sup>-</sup>                                                                                                                                                                                                                                          | PPT-C17-V3/V4-Glc-Xyl/Ara       | Rsyz1                   | C <sub>41</sub> H <sub>74</sub> O <sub>14</sub> | 788.4922  | L15,Y5       | 6.73  |
| 14 | 4.81 | 855.4718  | 855.3784[M-H] <sup>-</sup> 811.4839[M-H-CO <sub>2</sub> ] <sup>-</sup> 679.4563[M-H-CO <sub>2</sub> -Xyl/Ara] <sup>-</sup><br>637.4364[M-H-CO <sub>2</sub> -Ac-Xyl/Ara] <sup>-</sup> 475.3786[M-H-CO <sub>2</sub> -Ac-Xyl/Ara-Glc] <sup>-</sup>                                                                                                                                | PPT-Glc-Xyl/Ara-malonyl         | malonyl-F3A             | C <sub>44</sub> H <sub>72</sub> O <sub>16</sub> | 856.482   | Y5,N5        | 2.81  |

|    |      |           |                                                                                                                                                                                                                                                                                                                                                                  |                               |                     |                                                 |           |              |       |
|----|------|-----------|------------------------------------------------------------------------------------------------------------------------------------------------------------------------------------------------------------------------------------------------------------------------------------------------------------------------------------------------------------------|-------------------------------|---------------------|-------------------------------------------------|-----------|--------------|-------|
| 15 | 4.91 | 927.4958  | 927.5027[M-H] <sup>-</sup> 883.5069[M-H-CO <sub>2</sub> ] <sup>-</sup> 841.4992[M-H-CO <sub>2</sub> -Ac] <sup>-</sup><br>799.4887[M-H-CO <sub>2</sub> -2Ac] <sup>-</sup> 637.4183[M-H-CO <sub>2</sub> -2Ac-Glc] <sup>-</sup> 475.3675[M-H-CO <sub>2</sub> -2Ac-2Glc] <sup>-</sup>                                                                                | PPT-Glc-Glc-malonyl-acetyl    | malonyl-acetyl-Rg1B | C <sub>47</sub> H <sub>76</sub> O <sub>18</sub> | 928.5032  | L5,L15,Y5,N5 | -0.43 |
| 16 | 4.94 | 1063.5711 | 1063.5715[M-H] <sup>-</sup> 931.5293[M-H-Xyl/Ara] <sup>-</sup> 913.4992[M-H-Xyl/Ara-H <sub>2</sub> O] <sup>-</sup> 799.4959[M-H-2Xyl/Ara] <sup>-</sup> 637.4197[M-H-2Xyl/Ara-Glc] <sup>-</sup> 475.3858[M-H-2Xyl/Ara-2Glc] <sup>-</sup>                                                                                                                          | PPT-Glc-Glc-Xyl/Ara-Xyl/Ara   | Re1-X1              | C <sub>52</sub> H <sub>88</sub> O <sub>22</sub> | 1064.5767 | L5,L15,Y5,N5 | -2.07 |
| 17 | 5.23 | 867.4752  | 867.4691[M-H] <sup>-</sup> 823.4857[M-H-CO <sub>2</sub> ] <sup>-</sup> 781.4791[M-H-CO <sub>2</sub> -Ac] <sup>-</sup> 763.4678[M-H-CO <sub>2</sub> -Ac-H <sub>2</sub> O] <sup>-</sup> 619.4139[M-H-CO <sub>2</sub> -Ac-Glc] <sup>-</sup> 601.4099[M-H-CO <sub>2</sub> -Ac-Glc-H <sub>2</sub> O] <sup>-</sup> 457.3628[M-H-CO <sub>2</sub> -Ac-2Glc] <sup>-</sup> | PPT-C17-V1/V2-Glc-Glc-malonyl | malonyl-Rg9         | C <sub>45</sub> H <sub>72</sub> O <sub>16</sub> | 868.482   | L5,L15       | -1.15 |
| 18 | 5.24 | 1047.5332 | 1047.5392[M-H] <sup>-</sup> 1003.5535[M-H-CO <sub>2</sub> ] <sup>-</sup> 961.5421[M-H-CO <sub>2</sub> -Ac] <sup>-</sup> 799.4758[M-H-CO <sub>2</sub> -Ac-Glc] <sup>-</sup> 637.4244[M-H-CO <sub>2</sub> -Ac-2Glc] <sup>-</sup> 475.3817[M-H-CO <sub>2</sub> -Ac-3Glc] <sup>-</sup>                                                                               | PPT-Glc-Glc-Glc-malonyl       | malonyl-Re2-B       | C <sub>51</sub> H <sub>84</sub> O <sub>22</sub> | 1048.5454 | L15,Y5,N5    | 4.20  |
| 19 | 5.27 | 823.4844  | 823.4831[M-H] <sup>-</sup> 781.4692[M-H-Ac] <sup>-</sup> 763.4840[M-H-Ac-H <sub>2</sub> O] <sup>-</sup> 619.4307[M-H-Ac-Glc] <sup>-</sup> 457.3747[M-H-Ac-2Glc] <sup>-</sup>                                                                                                                                                                                     | PPT-C17-V1/V2-Glc-Glc-acetyl  | acetyl-Rg9          | C <sub>44</sub> H <sub>72</sub> O <sub>14</sub> | 824.4922  | L15,Y5       | 0.00  |
| 20 | 5.52 | 1121.5748 | 1121.5820[M-H] <sup>-</sup> 959.5284[M-H-Glc] <sup>-</sup> 797.4781[M-H-2Glc] <sup>-</sup> 635.4177[M-H-3Glc] <sup>-</sup> 473.3593[M-H-4Glc] <sup>-</sup>                                                                                                                                                                                                       | PPT-C17-V5-Glc-Glc-Glc-Glc    | Rh-4G               | C <sub>54</sub> H <sub>90</sub> O <sub>24</sub> | 1122.5822 | L5,L15,Y5,N5 | -0.36 |
| 21 | 5.62 | 975.5131  | 975.5230[M+FA-H] <sup>-</sup> 929.5099[M-H] <sup>-</sup> 797.4873[M-H-Xyl/Ara] <sup>-</sup> 635.4114[M-H-Xyl/Ara-Glc] <sup>-</sup> 617.4074[M-H-Xyl/Ara-Glc-H <sub>2</sub> O] <sup>-</sup> 473.3614[M-H-Xyl/Ara-2Glc] <sup>-</sup>                                                                                                                               | PPT-C17-V5-Glc-Glc-Xyl/Ara    | RH-2GX              | C <sub>47</sub> H <sub>78</sub> O <sub>18</sub> | 930.5188  | L15          | 1.18  |
| 22 | 5.76 | 927.4945  | 927.5334[M-H] <sup>-</sup> 883.5071[M-H-CO <sub>2</sub> ] <sup>-</sup> 841.4904[M-H-CO <sub>2</sub> -Ac] <sup>-</sup> 799.5156[M-H-CO <sub>2</sub> -2Ac] <sup>-</sup> 637.4343[M-H-CO <sub>2</sub> -2Ac-Glc] <sup>-</sup> 475.3852[M-H-CO <sub>2</sub> -2Ac-2Glc] <sup>-</sup>                                                                                   | PPT-Glc-Glc-malonyl-acetyl    | malonyl-acetyl-Rg1C | C <sub>47</sub> H <sub>76</sub> O <sub>18</sub> | 928.5032  | L5,L15       | 0.97  |
| 23 | 5.94 | 855.4744  | 811.4870[M-CO <sub>2</sub> ] <sup>-</sup> 769.4764[M-H-CO <sub>2</sub> -Ac] <sup>-</sup> 637.4296[M-H-CO <sub>2</sub> -Ac-Xyl/Ara] <sup>-</sup> 475.3806[M-H-CO <sub>2</sub> -Ac-Xyl/Ara-Glc] <sup>-</sup>                                                                                                                                                       | PPT-Glc-Xyl/Ara-malonyl       | malonyl-F3B         | C <sub>44</sub> H <sub>72</sub> O <sub>16</sub> | 856.482   | L15,Y5       | -0.23 |

|    |      |           |                                                                       |                                                                   |                                                                     |                                            |                   |                                                 |           |              |       |
|----|------|-----------|-----------------------------------------------------------------------|-------------------------------------------------------------------|---------------------------------------------------------------------|--------------------------------------------|-------------------|-------------------------------------------------|-----------|--------------|-------|
| 24 | 6.09 | 943.5259  | 943.5243[M-H] <sup>-</sup>                                            | 797.4652[M-H-Rha] <sup>-</sup>                                    | 635.4301[M-H-Rha-Glc] <sup>-</sup>                                  | PPT-C17-V5-Glc-Glc-Rha                     | Rh-2GR            | C <sub>48</sub> H <sub>80</sub> O <sub>18</sub> | 944.5345  | L5,Y5,N5     | 0.85  |
|    |      |           |                                                                       | 473.3596[M-H-Rha-2Glc] <sup>-</sup>                               |                                                                     |                                            |                   |                                                 |           |              |       |
| 25 | 6.14 | 1073.5542 | 1073.5571[M-H] <sup>-</sup>                                           | 1029.5684[M-H-CO <sub>2</sub> ] <sup>-</sup>                      | 987.5569[M-H-CO <sub>2</sub> -Ac] <sup>-</sup>                      | PPD-Glc-Glc-Glc-malonyl-acetyl             | malonyl-acetyl-Rd | C <sub>53</sub> H <sub>86</sub> O <sub>22</sub> | 1074.5611 | L15,Y5,N5    | -0.84 |
|    |      |           | 945.5459[M-H-CO <sub>2</sub> -2Ac] <sup>-</sup>                       | 783.4915[M-H-CO <sub>2</sub> -2Ac-Glc] <sup>-</sup>               | 621.4386[M-H-CO <sub>2</sub> -2Ac-2Glc] <sup>-</sup>                |                                            |                   |                                                 |           |              |       |
|    |      |           |                                                                       | 459.3961[M-H-CO <sub>2</sub> -2Ac-3Glc] <sup>-</sup>              |                                                                     |                                            |                   |                                                 |           |              |       |
| 26 | 6.15 | 1117.5416 | 1117.5461[M-H] <sup>-</sup>                                           | 1073.5553[M-H-CO <sub>2</sub> ] <sup>-</sup>                      | 1029.5668[M-H-2CO <sub>2</sub> ] <sup>-</sup>                       | PPD/PPD-C17-V4-Glc-Glc-Glc-malonyl-malonyl | D-malonyl-Rd      | C <sub>56</sub> H <sub>86</sub> O <sub>24</sub> | 1118.5509 | L5,L15,Y5,N5 | 1.34  |
|    |      |           | 987.5565[M-H-2CO <sub>2</sub> -Ac] <sup>-</sup>                       | 969.5464[M-H-2CO <sub>2</sub> -Ac-H <sub>2</sub> O] <sup>-</sup>  |                                                                     |                                            |                   |                                                 |           |              |       |
|    |      |           | 945.5429[M-H-2CO <sub>2</sub> -2Ac] <sup>-</sup>                      | 927.5361[M-H-2CO <sub>2</sub> -2Ac-H <sub>2</sub> O] <sup>-</sup> |                                                                     |                                            |                   |                                                 |           |              |       |
|    |      |           | 765.4773[M-H-2CO <sub>2</sub> -2Ac-H <sub>2</sub> O-Glc] <sup>-</sup> | 621.4378[M-H-2CO <sub>2</sub> -2Ac-2Glc] <sup>-</sup>             |                                                                     |                                            |                   |                                                 |           |              |       |
|    |      |           |                                                                       | 459.3860[M-H-2CO <sub>2</sub> -2Ac-3Glc] <sup>-</sup>             |                                                                     |                                            |                   |                                                 |           |              |       |
| 27 | 6.2  | 869.4865  | 869.4844[M-H] <sup>-</sup>                                            | 825.5026[M-H-CO <sub>2</sub> ] <sup>-</sup>                       | 783.4917[M-H-CO <sub>2</sub> -Ac] <sup>-</sup>                      | PPT-Glc-Rha-malonyl                        | malonyl-Rg2       | C <sub>45</sub> H <sub>74</sub> O <sub>16</sub> | 870.4977  | L5,L15,N5    | 3.91  |
|    |      |           | 793.4476                                                              | 637.4411[M-H-CO <sub>2</sub> -Ac-Rha] <sup>-</sup>                | 619.4101[M-H-CO <sub>2</sub> -Ac-Rha-H <sub>2</sub> O] <sup>-</sup> |                                            |                   |                                                 |           |              |       |
|    |      |           |                                                                       | 475.3715[M-H-CO <sub>2</sub> -Ac-Rha-Glc] <sup>-</sup>            |                                                                     |                                            |                   |                                                 |           |              |       |
| 28 | 6.39 | 797.4661  | 797.4844[M-H] <sup>-</sup>                                            | 635.4112[M-H-Glc] <sup>-</sup>                                    | 617.4116[M-H-Glc-H <sub>2</sub> O] <sup>-</sup>                     | PPT-C17-V5-Glc-Glc                         | Rh-2G1            | C <sub>42</sub> H <sub>70</sub> O <sub>14</sub> | 798.4766  | L5,L15,Y5,N5 | 3.39  |
|    |      |           |                                                                       | 473.3679[M-H-2Glc] <sup>-</sup>                                   |                                                                     |                                            |                   |                                                 |           |              |       |
| 29 | 6.68 | 959.523   | 959.5224[M-H] <sup>-</sup>                                            | 797.4642[M-H-Glc] <sup>-</sup>                                    | 635.4078[M-H-2Glc] <sup>-</sup>                                     | PPT-C17-V5-Glc-Glc-Glc                     | Rh-3G             | C <sub>48</sub> H <sub>80</sub> O <sub>19</sub> | 960.5249  | L5,L15       | -6.15 |
|    |      |           |                                                                       | 473.3716[M-H-3Glc] <sup>-</sup>                                   |                                                                     |                                            |                   |                                                 |           |              |       |
| 30 | 7.29 | 1091.6066 | 1091.6066[M-H] <sup>-</sup>                                           | 946.5538[M-H-Rha] <sup>-</sup>                                    | 799.4800[M-H-2Rha] <sup>-</sup>                                     | PPT-Glc-Glc-Rha-Rha                        | Re-G              | C <sub>54</sub> H <sub>92</sub> O <sub>22</sub> | 1092.608  | L5,L15       | -5.86 |
|    |      |           | 637.4425[M-H-2Rha-Glc] <sup>-</sup>                                   | 475.3918[M-H-2Rha-2Glc] <sup>-</sup>                              |                                                                     |                                            |                   |                                                 |           |              |       |
| 31 | 7.44 | 987.5562  | 987.5562[M+FA-H] <sup>-</sup>                                         | 945.5393[M+FA-H-Ac] <sup>-</sup>                                  | 927.5407[M+FA-H-Ac-H <sub>2</sub> O] <sup>-</sup>                   | PPD/PPD-C17-V4-Xyl/Ara-Rha-Glc-acetyl      | acetyl-Rh2-XR     | C <sub>49</sub> H <sub>82</sub> O <sub>17</sub> | 942.5552  | L5,L15,Y5,N5 | -3.50 |
|    |      |           | 783.5059[M+FA-H-Ac-Glc] <sup>-</sup>                                  | 637.4343[M+FA-H-Ac-Glc-Rha] <sup>-</sup>                          |                                                                     |                                            |                   |                                                 |           |              |       |
|    |      |           | 571.3929                                                              | 459.3821[M-H-Ac-Glc-Rha-Xyl/Ara] <sup>-</sup>                     |                                                                     |                                            |                   |                                                 |           |              |       |
| 32 | 7.45 | 1019.5413 | 1019.5463[M+FA-H] <sup>-</sup>                                        | 973.5403[M-H] <sup>-</sup>                                        | 931.5293[M-H-Ac] <sup>-</sup>                                       | PPT-Glc-Glc-Xyl/Ara-acetyl                 | acetyl-NG-R1B     | C <sub>49</sub> H <sub>82</sub> O <sub>19</sub> | 974.545   | L15          | -3.18 |
|    |      |           | 799.4878[M-H-Ac-Xyl/Ara] <sup>-</sup>                                 | 637.4327[M-H-Ac-Xyl/Ara-Glc] <sup>-</sup>                         |                                                                     |                                            |                   |                                                 |           |              |       |
|    |      |           |                                                                       | 475.3585[M-H-Ac-Xyl/Ara-2Glc] <sup>-</sup>                        |                                                                     |                                            |                   |                                                 |           |              |       |

|    |      |           |                                                                                                                                                                                                                                                                                                                                                                                                                                                                         |                                                           |                            |                                                 |           |              |       |
|----|------|-----------|-------------------------------------------------------------------------------------------------------------------------------------------------------------------------------------------------------------------------------------------------------------------------------------------------------------------------------------------------------------------------------------------------------------------------------------------------------------------------|-----------------------------------------------------------|----------------------------|-------------------------------------------------|-----------|--------------|-------|
| 33 | 7.8  | 843.4773  | 843.4719[M+FA-H] <sup>-</sup> 797.4668[M-H] <sup>-</sup> 635.4044[M-H-Glc] <sup>-</sup><br>473.3833[M-H-2Glc] <sup>-</sup>                                                                                                                                                                                                                                                                                                                                              | PPT-C17-V5-<br>Glc-Glc                                    | Rh-2G2                     | C <sub>42</sub> H <sub>70</sub> O <sub>14</sub> | 798.4766  | L5,L15,Y5,N5 | 2.51  |
| 34 | 7.84 | 913.515   | 913.5058[M-H] <sup>-</sup> 781.4751[M-H-Xyl/Ara] <sup>-</sup> 619.4176[M-H-Xyl/Ara-Glc] <sup>-</sup><br>457.3746[M-H-Xyl/Ara-2Glc] <sup>-</sup>                                                                                                                                                                                                                                                                                                                         | PPT-C17-<br>V1/V2-Glc-Glc-<br>Xyl/Ara                     | DHDXG-G2                   | C <sub>47</sub> H <sub>78</sub> O <sub>17</sub> | 914.5239  | L15          | 1.20  |
| 35 | 7.9  | 1029.5249 | 1029.5187[M-H] <sup>-</sup> 985.5372[M-H-CO <sub>2</sub> ] <sup>-</sup> 943.5307[M-H-CO <sub>2</sub> -Ac] <sup>-</sup><br>781.4715[M-H-CO <sub>2</sub> -Ac-Glc] <sup>-</sup> 619.4207[M-H-CO <sub>2</sub> -Ac-2Glc] <sup>-</sup><br>457.3752[M-H-CO <sub>2</sub> -Ac-3Glc] <sup>-</sup>                                                                                                                                                                                 | PPT-C17-<br>V1/V2-Glc-Glc-<br>Glc-malonyl                 | malonyl-<br>DHD3G          | C <sub>51</sub> H <sub>82</sub> O <sub>21</sub> | 1030.5349 | L5,L15,Y5,N5 | 2.14  |
| 36 | 7.98 | 985.5349  | 985.5349[M-H] <sup>-</sup> 943.5256[M-H-Ac] <sup>-</sup> 935.5104 781.4708[M-H-Ac-<br>Glc] <sup>-</sup> 763.4356[M-H-Ac-Glc-H <sub>2</sub> O] <sup>-</sup> 619.4235[M-H-Ac-2Glc] <sup>-</sup><br>457.3626[M-H-Ac-3Glc] <sup>-</sup>                                                                                                                                                                                                                                     | PPT-C17-<br>V1/V2-Glc-Glc-<br>Glc-acetyl                  | acetyl-<br>DXD3G           | C <sub>50</sub> H <sub>82</sub> O <sub>19</sub> | 986.545   | L5,L15,Y5,N5 | 2.33  |
| 37 | 8.19 | 975.5574  | 929.5482[M-H] <sup>-</sup> 783.4916[M-H-Rha] <sup>-</sup> 765.4714[M-H-Rha-H <sub>2</sub> O] <sup>-</sup><br>637.4445[M-H-2Rha] <sup>-</sup> 619.4189[M-H-2Rha-H <sub>2</sub> O] <sup>-</sup> 475.3790[M-H-2Rha-<br>Glc] <sup>-</sup>                                                                                                                                                                                                                                   | PPD/PPD-C17-<br>V4-Glc-Rha-Rha                            | C-K-2R                     | C <sub>48</sub> H <sub>82</sub> O <sub>17</sub> | 930.5552  | L5,L15,Y5,N5 | -0.86 |
| 38 | 8.29 | 1099.57   | 1099.5700[M-H] <sup>-</sup> 1055.5461[M-H-CO <sub>2</sub> ] <sup>-</sup> 987.5577[M-H-CO <sub>2</sub> -C <sub>4</sub> H <sub>4</sub> O] <sup>-</sup><br>945.5549[M-H-CO <sub>2</sub> -C <sub>4</sub> H <sub>4</sub> O-Ac] <sup>-</sup> 783.4609[M-H-CO <sub>2</sub> -Ac-C <sub>4</sub> H <sub>4</sub> O-Glc] <sup>-</sup><br>621.4250[M-H-CO <sub>2</sub> -Ac-Glc-Glc] <sup>-</sup> 459.4136[M-H-CO <sub>2</sub> -Ac-C <sub>4</sub> H <sub>4</sub> O-3Glc] <sup>-</sup> | PPD/PPD-C17-<br>V4-Glc-Glc-Glc-<br>butene acyl-<br>acetyl | butene acyl-<br>acetyl-Rd1 | C <sub>55</sub> H <sub>88</sub> O <sub>22</sub> | 1100.5767 | L5,L15,Y5,N5 | -1.00 |
| 39 | 8.38 | 973.5338  | 973.5386[M+FA-H] <sup>-</sup> 927.5333[M-H] <sup>-</sup> 781.4906[M-H-Rha] <sup>-</sup><br>619.4229[M-H-Rha-Glc] <sup>-</sup> 457.3663[M-H-Rha-2Glc] <sup>-</sup>                                                                                                                                                                                                                                                                                                       | PPT-C17-<br>V1/V2-Glc-Glc-<br>Rha                         | RG6-G2                     | C <sub>48</sub> H <sub>80</sub> O <sub>17</sub> | 928.5396  | L5,L15,Y5,N5 | -1.62 |
| 40 | 8.66 | 1055.5735 | 1055.5735[M-H] <sup>-</sup> 987.5559[M-H-C <sub>4</sub> H <sub>4</sub> O] <sup>-</sup> 945.5475[M-H-C <sub>4</sub> H <sub>4</sub> O-Ac] <sup>-</sup><br>783.4845[M-H-C <sub>4</sub> H <sub>4</sub> O-Ac-Glc] <sup>-</sup> 621.4413[M-H-C <sub>4</sub> H <sub>4</sub> O-Ac-2Glc] <sup>-</sup><br>459.3570[M-H-C <sub>4</sub> H <sub>4</sub> O-Ac-3Glc] <sup>-</sup>                                                                                                      | PPD/PPD-C17-<br>V4-Glc-Glc-Glc-<br>butene acyl-<br>acetyl | butene acyl-<br>acetyl-Rd2 | C <sub>54</sub> H <sub>88</sub> O <sub>20</sub> | 1056.5869 | L5,L15,Y5,N5 | 5.31  |

|    |      |           |                                                     |                                                            |                                                                    |                                       |                   |                                                 |           |              |       |
|----|------|-----------|-----------------------------------------------------|------------------------------------------------------------|--------------------------------------------------------------------|---------------------------------------|-------------------|-------------------------------------------------|-----------|--------------|-------|
|    |      |           | 973.5344[M+FA+H] <sup>-</sup>                       | 927.5315[M-H] <sup>-</sup>                                 | 799.4842[M-H-Rha+H <sub>2</sub> O] <sup>-</sup>                    | PPT-C17-                              |                   |                                                 |           |              |       |
| 41 | 9.06 | 973.5344  | 637.4384[M-H-Rha-Glc+H <sub>2</sub> O] <sup>-</sup> | 475.3809[M-Rha-2Glc+H <sub>2</sub> O] <sup>-</sup>         | 457.3656[M-H-Rha-2Glc] <sup>-</sup>                                | V1/V2-Glc-Glc-Rha                     | RG6-G3            | C <sub>48</sub> H <sub>80</sub> O <sub>17</sub> | 928.5396  | L5,L15,Y5,N5 | 0.32  |
| 42 | 9.49 | 797.469   | 797.4732[M-H] <sup>-</sup>                          | 635.4156[M-H-Glc] <sup>-</sup>                             | 473.3723[M-H-2Glc] <sup>-</sup>                                    | PPT-C17-V5-Glc-Glc                    | Rh-2G3            | C <sub>42</sub> H <sub>70</sub> O <sub>14</sub> | 798.4766  | L5,L15,Y5,N5 | -0.25 |
| 43 | 9.61 | 999.5537  | 999.5562[M-H] <sup>-</sup>                          | 931.5240[M-H-C <sub>4</sub> H <sub>4</sub> O] <sup>-</sup> | 799.5457[M-H-C <sub>4</sub> H <sub>4</sub> O-Xyl/Ara] <sup>-</sup> | PPT-Glc-Glc-Xyl/Ara-butene acyl       | butene acyl-NG-R1 | C <sub>51</sub> H <sub>84</sub> O <sub>19</sub> | 1000.5607 | L15,Y5       | -0.80 |
| 44 | 9.81 | 1089.5816 | 1089.5887[M-H <sub>2</sub> O-H] <sup>-</sup>        | 945.5582[M-H-Glc] <sup>-</sup>                             | 927.5169[M-H-Glc-H <sub>2</sub> O] <sup>-</sup>                    | PPT-Glc-GlcA-Xyl/Ara-Glc              | NG-R1-GA          | C <sub>53</sub> H <sub>88</sub> O <sub>24</sub> | 1108.5666 | L5,L15,N5    | -1.08 |
| 45 | 9.85 | 883.4658  | 883.4760[M+FA-H] <sup>-</sup>                       | 837.4935[M-H] <sup>-</sup>                                 | 769.4886[M-H-C <sub>4</sub> H <sub>4</sub> O] <sup>-</sup>         | PPT-Glc-Xyl/Ara-butene acyl           | butene acyl-NG-R2 | C <sub>45</sub> H <sub>74</sub> O <sub>14</sub> | 838.5079  | L5,L15,Y5,N5 | 7.88  |
| 46 | 9.9  | 1091.5655 | 1091.5655[M-H] <sup>-</sup>                         | 915.5721[M-H-GlcA] <sup>-</sup>                            | 783.4803[M-H-GlcA-Xyl/Ara] <sup>-</sup>                            | PPD/PPD-C17-V4-Glc-Glc-Xyl/Ara-GlcA   | CS-III-GA         | C <sub>53</sub> H <sub>88</sub> O <sub>23</sub> | 1092.5716 | L15,Y5,N5    | -1.56 |
| 47 | 9.91 | 957.5433  | 957.5450[M-H] <sup>-</sup>                          | 915.5336[M-H-Ac] <sup>-</sup>                              | 765.4829[M-H-Ac-Ara/Xyl-H <sub>2</sub> O] <sup>-</sup>             | PPD/PPD-C17-V4-Glc-Glc-Xyl/Ara-acetyl | acetyl-CS-III A   | C <sub>49</sub> H <sub>82</sub> O <sub>18</sub> | 958.5501  | L5,L15,Y5,N5 | -1.04 |
| 48 | 9.91 | 1001.5334 | 1001.5341[M-H] <sup>-</sup>                         | 957.5440[M-H-CO <sub>2</sub> ] <sup>-</sup>                | 915.5331[M-H-CO <sub>2</sub> -Ac] <sup>-</sup>                     | PPD/PPD-C17-V4-Glc-Glc-GlcA-acetyl    | acetyl-F2-GA1     | C <sub>50</sub> H <sub>82</sub> O <sub>20</sub> | 1002.5399 | L5,L15,Y5,N5 | -1.30 |

|    |       |           |                                                                                                                                                                                                                                                                                                                                                                                                                                                                                                                                                                          |                                               |                        |                                                 |           |              |       |
|----|-------|-----------|--------------------------------------------------------------------------------------------------------------------------------------------------------------------------------------------------------------------------------------------------------------------------------------------------------------------------------------------------------------------------------------------------------------------------------------------------------------------------------------------------------------------------------------------------------------------------|-----------------------------------------------|------------------------|-------------------------------------------------|-----------|--------------|-------|
| 49 | 9.97  | 1105.5767 | 1105.5853[M-H] <sup>-</sup> 943.5257[M-H-Glc] <sup>-</sup> 781.4860[M-H-2Glc] <sup>-</sup><br>619.4215[M-H-3Glc] <sup>-</sup> 457.3757[M-H-4Glc] <sup>-</sup>                                                                                                                                                                                                                                                                                                                                                                                                            | PPT-C17-<br>V1/V2-Glc-Glc-<br>Glc-Glc         | DHD4G                  | C <sub>34</sub> H <sub>90</sub> O <sub>23</sub> | 1106.5873 | L5,L15,Y5,N5 | 2.53  |
| 50 | 10.15 | 973.573   | 973.5730[M-H] <sup>-</sup> 945.5348[M-H-CO] <sup>-</sup> 783.4910[M-H-CO-Glc] <sup>-</sup><br>637.4468[M-H-CO-Glc-Rha] <sup>-</sup> 475.4179[M-H-CO-Glc-Rha-Glc] <sup>-</sup>                                                                                                                                                                                                                                                                                                                                                                                            | PPT-Glc-Glc-<br>Rha-formyl                    | formyl-F2-R            | C <sub>50</sub> H <sub>86</sub> O <sub>18</sub> | 974.5814  | Y5,N5        | 0.62  |
| 51 | 10.17 | 767.4604  | 767.4543[M-H] <sup>-</sup> 635.4190[M-H-Xyl/Ara] <sup>-</sup> 473.3615[M-H-Xyl/Ara-Glc] <sup>-</sup>                                                                                                                                                                                                                                                                                                                                                                                                                                                                     | PPT-C17-V5-<br>Glc-Xyl/Ara                    | Rh-GX1                 | C <sub>41</sub> H <sub>68</sub> O <sub>13</sub> | 768.466   | Y5,N5        | -2.87 |
| 52 | 10.22 | 957.5418  | 957.5405[M-H] <sup>-</sup> 915.5364[M-H-Ac] <sup>-</sup> 783.4952[M-H-Ac-Ara/Xyl] <sup>-</sup><br>621.4454[M-H-Ac-Ara/Xyl-Glc] <sup>-</sup> 459.3717[M-H-Ac-Ara/Xyl-2Glc] <sup>-</sup>                                                                                                                                                                                                                                                                                                                                                                                   | PPD/PPD-C17-<br>V4-Glc-Glc-<br>Xyl/Ara-acetyl | acetyl-CS-<br>IIIB     | C <sub>49</sub> H <sub>82</sub> O <sub>18</sub> | 958.5501  | L5,L15,Y5,N5 | 0.52  |
| 53 | 10.31 | 1001.5343 | 1001.5397[M-H] <sup>-</sup> 957.5495[M-H-CO <sub>2</sub> ] <sup>-</sup> 915.5383[M-H-CO <sub>2</sub> -Ac] <sup>-</sup><br>783.4975[M-H-Ac-GlcA] <sup>-</sup> 765.4897[M-H-Ac-GlcA-H <sub>2</sub> O] <sup>-</sup> 621.4340[M-<br>H-Ac-GlcA-Glc] <sup>-</sup> 459.3897[M-H-Ac-GlcA-2Glc] <sup>-</sup>                                                                                                                                                                                                                                                                      | PPD/PPD-C17-<br>V4-Glc-Glc-<br>GlcA-acetyl    | acetyl-F2-<br>GA2      | C <sub>50</sub> H <sub>82</sub> O <sub>20</sub> | 1002.5399 | L5,L15,Y5,N5 | -2.20 |
| 54 | 10.39 | 1013.5667 | 1013.5721[M-H] <sup>-</sup> 945.5460[M-H-C <sub>4</sub> H <sub>4</sub> O] <sup>-</sup> 927.5272[M-H-C <sub>4</sub> H <sub>4</sub> O-H <sub>2</sub> O] <sup>-</sup><br>799.4930[M-H-C <sub>4</sub> H <sub>4</sub> O-Rha] <sup>-</sup> 637.4264[M-H-C <sub>4</sub> H <sub>4</sub> O-Rha-Glc] <sup>-</sup><br>475.3868[M-H-C <sub>4</sub> H <sub>4</sub> O-Rha-2Glc] <sup>-</sup>                                                                                                                                                                                           | PPT-Glc-Glc-<br>Rha-butene acyl               | butene acyl-<br>F2-R   | C <sub>52</sub> H <sub>86</sub> O <sub>19</sub> | 1014.5763 | L5,L15,Y5,N5 | 1.78  |
| 55 | 10.82 | 1073.5571 | 1073.5555[M-H] <sup>-</sup> 1029.5678[M-H-CO <sub>2</sub> ] <sup>-</sup> 987.5572[M-H-CO <sub>2</sub> -Ac] <sup>-</sup><br>969.5451[M-H-CO <sub>2</sub> -Ac-H <sub>2</sub> O] <sup>-</sup> 945.5452[M-H-CO <sub>2</sub> -2Ac] <sup>-</sup> 927.5335[M-H-<br>CO <sub>2</sub> -2Ac-H <sub>2</sub> O] <sup>-</sup> 909.5230[M-H-CO <sub>2</sub> -2Ac-2H <sub>2</sub> O] <sup>-</sup> 765.4762[M-H-CO <sub>2</sub> -<br>2Ac-H <sub>2</sub> O-Glc] <sup>-</sup> 621.4462[M-H-CO <sub>2</sub> -2Ac-2Glc] <sup>-</sup> 459.3963[M-H-CO <sub>2</sub> -<br>2Ac-3Glc] <sup>-</sup> | PPD-Glc-Glc-<br>Glc-malonyl-<br>acetyl        | acetyl-Rd              | C <sub>53</sub> H <sub>86</sub> O <sub>22</sub> | 1074.5611 | L5,L15,Y5,N5 | -3.54 |
| 56 | 10.98 | 861.459   | 861.4590[M-H] <sup>-</sup> 793.4165[M-H-C <sub>4</sub> H <sub>4</sub> O] <sup>-</sup> 617.3394[M-H-C <sub>4</sub> H <sub>4</sub> O-GlcA] <sup>-</sup><br>455.3483[M-H-C <sub>4</sub> H <sub>4</sub> O-GlcA-Glc] <sup>-</sup>                                                                                                                                                                                                                                                                                                                                             | OA-Glc-GlcA-<br>butene acyl                   | butene acyl-<br>CS-Iva | C <sub>46</sub> H <sub>70</sub> O <sub>15</sub> | 862.4715  | L5,L15,Y5,N5 | 5.46  |
| 57 | 11.16 | 971.5612  | 971.5612[M-H] <sup>-</sup> 929.5514[M-H-Ac] <sup>-</sup> 911.5376[M-H-Ac-H <sub>2</sub> O] <sup>-</sup><br>765.4803[M-H-Ac-H <sub>2</sub> O-Rha] <sup>-</sup> 621.4465[M-H-Ac-Rha-Glc] <sup>-</sup><br>459.3873[M-H-Ac-Rha-2Glc] <sup>-</sup>                                                                                                                                                                                                                                                                                                                            | PPD/C17(D)-V4-<br>Glc-Glc-Rha-<br>acetyl      | acetyl-F2-<br>R1       | C <sub>50</sub> H <sub>84</sub> O <sub>18</sub> | 972.5658  | L5,L15,Y5,N5 | -3.29 |

| Index | Retention time (min) | Mass (Da) | Formula                                                                                                                                                                                                                          | Mass (Da)                                                                                                                                                   | Formula                                                       | PPD/PPD-C17-<br>V4-Glc-Glc-Rha-<br>malonyl                 | malonyl-F2-<br>R   | $C_{51}H_{84}O_{20}$ | 1016.5556 | L5,L15,Y5,N5 | -0.98 |
|-------|----------------------|-----------|----------------------------------------------------------------------------------------------------------------------------------------------------------------------------------------------------------------------------------|-------------------------------------------------------------------------------------------------------------------------------------------------------------|---------------------------------------------------------------|------------------------------------------------------------|--------------------|----------------------|-----------|--------------|-------|
| 58    | 11.16                | 1015.5488 | 1015.5528[M-H] <sup>-</sup><br>911.5392[M-H-CO <sub>2</sub> -Ac-H <sub>2</sub> O] <sup>-</sup><br>765.4818[M-H-CO <sub>2</sub> -Ac-Rha-H <sub>2</sub> O] <sup>-</sup><br>459.3858[M-H-CO <sub>2</sub> -Ac-Rha-2Glc] <sup>-</sup> | 971.5609[M-H-CO <sub>2</sub> ] <sup>-</sup><br>783.4926[M-H-CO <sub>2</sub> -Ac-Rha] <sup>-</sup><br>621.4449[M-H-CO <sub>2</sub> -Ac-Rha-Glc] <sup>-</sup> | 929.5409[M-H-CO <sub>2</sub> -Ac] <sup>-</sup>                |                                                            |                    |                      |           |              |       |
| 59    | 11.36                | 813.4626  | 813.4670[M+FA-H] <sup>-</sup><br>473.3540[M-H-Xyl/Ara-Glc] <sup>-</sup>                                                                                                                                                          | 767.4590[M-H] <sup>-</sup><br>635.4168[M-H-Xyl/Ara] <sup>-</sup>                                                                                            |                                                               | PPT-C17-V5-<br>Glc-Xyl/Ara                                 | Rh-GX2             | $C_{41}H_{68}O_{13}$ | 768.466   | L15,Y5       | -1.04 |
| 60    | 11.42                | 1179.6138 | 1179.6188[M-H] <sup>-</sup><br>753.4945[M-H-2Ara/Xyl-Glc] <sup>-</sup><br>459.3824[M-H-3Ara/Xyl-2Glc] <sup>-</sup>                                                                                                               | 1047.5720[M-H-Ara/Xyl] <sup>-</sup><br>621.4445[M-H-3Ara/Xyl-Glc] <sup>-</sup>                                                                              | 915.5444[M-H-2Ara/Xyl] <sup>-</sup>                           | PPD/PPD-C17-<br>V4-Glc-Glc-<br>Ara/Xyl-<br>Ara/Xyl-Ara/Xyl | CS-III-X1          | $C_{57}H_{96}O_{25}$ | 1180.6241 | L5,L15,Y5,N5 | 2.12  |
| 61    | 11.68                | 1055.579  | 1055.5840[M-H] <sup>-</sup><br>765.4825[M-H-C <sub>4</sub> H <sub>4</sub> O-Ac-Glc-H <sub>2</sub> O] <sup>-</sup><br>459.3762[M-H-C <sub>4</sub> H <sub>4</sub> O-Ac-3Glc] <sup>-</sup>                                          | 987.5533[M-H-C <sub>4</sub> H <sub>4</sub> O] <sup>-</sup><br>621.4443[M-H-C <sub>4</sub> H <sub>4</sub> O-Ac-2Glc] <sup>-</sup>                            | 945.5510[M-H-C <sub>4</sub> H <sub>4</sub> O-Ac] <sup>-</sup> | PPD/PPD-C17-<br>V4-Glc-Glc-Glc-<br>acetyl-butene<br>acyl   | butene acid-<br>Rc | $C_{54}H_{88}O_{21}$ | 1056.5869 | L5,L15,Y5,N5 | 0.09  |
| 62    | 11.82                | 1091.5974 | 1091.6068[M-H] <sup>-</sup><br>621.4470[M-H-Rha-2Glc] <sup>-</sup>                                                                                                                                                               | 945.5576[M-H-Rha] <sup>-</sup><br>459.4131[M-H-Rha-3Glc] <sup>-</sup>                                                                                       | 783.4961[M-H-Rha-Glc] <sup>-</sup>                            | PPD/PPD-C17-<br>V4-Glc-Glc-Glc-<br>Rha                     | Rd-R               | $C_{54}H_{92}O_{22}$ | 1092.608  | L5,L15,Y5,N5 | 2.57  |
| 63    | 12                   | 1179.6154 | 1179.6168[M-H] <sup>-</sup><br>753.4839[M-H-2Ara/Xyl-Glc] <sup>-</sup><br>459.3888[M-H-3Ara/Xyl-2Glc] <sup>-</sup>                                                                                                               | 1047.5746[M-H-Ara/Xyl] <sup>-</sup><br>621.4416[M-H-3Ara/Xyl-Glc] <sup>-</sup>                                                                              | 915.5237[M-H-2Ara/Xyl] <sup>-</sup>                           | PPD/PPD-C17-<br>V4-Glc-Glc-<br>Ara/Xyl-<br>Ara/Xyl-Ara/Xyl | CS-III-X2          | $C_{57}H_{96}O_{25}$ | 1180.6241 | L5,L15,Y5,N5 | 0.76  |
| 64    | 12.03                | 943.5281  | 943.5291[M-H] <sup>-</sup><br>457.3768[M-H-3Glc] <sup>-</sup>                                                                                                                                                                    | 781.4732[M-H-Glc] <sup>-</sup><br>619.4165[M-H-2Glc] <sup>-</sup>                                                                                           |                                                               | PPT-C17-<br>V1/V2-Glc-Glc-<br>Glc                          | DHD3G              | $C_{48}H_{80}O_{18}$ | 944.5345  | L5,L15,Y5,N5 | -1.48 |

|    |       |           |                                                                                                                                                                                                                                     |                                                                                                                                                                                                                            |                                                                                                                                                                       |                                                            |                               |                                                 |           |              |       |
|----|-------|-----------|-------------------------------------------------------------------------------------------------------------------------------------------------------------------------------------------------------------------------------------|----------------------------------------------------------------------------------------------------------------------------------------------------------------------------------------------------------------------------|-----------------------------------------------------------------------------------------------------------------------------------------------------------------------|------------------------------------------------------------|-------------------------------|-------------------------------------------------|-----------|--------------|-------|
| 65 | 12.18 | 1055.5786 | 1055.5786[M-H] <sup>-</sup><br>765.4871[M-H-Ac-C <sub>4</sub> H <sub>4</sub> O-Glc-H <sub>2</sub> O] <sup>-</sup><br>459.3911[M-H-Ac-C <sub>4</sub> H <sub>4</sub> O-3Glc] <sup>-</sup>                                             | 1013.5735[M-H-Ac] <sup>-</sup><br>621.4685[M-H-Ac-C <sub>4</sub> H <sub>4</sub> O-2Glc] <sup>-</sup>                                                                                                                       | 945.5372[M-H-Ac-C <sub>4</sub> H <sub>4</sub> O] <sup>-</sup><br>621.4685[M-H-Ac-C <sub>4</sub> H <sub>4</sub> O-2Glc] <sup>-</sup>                                   | PPD/PPD-C17-<br>V4-Glc-Glc-Glc-<br>acetyl-butene<br>acyl   | acetyl-<br>butene acyl-<br>Rd | C <sub>54</sub> H <sub>88</sub> O <sub>22</sub> | 1056.5869 | L5,L15,Y5,N5 | 0.47  |
| 66 | 12.2  | 1099.5695 | 1099.5695[M-H] <sup>-</sup><br>945.5487[M-H-CO <sub>2</sub> -Ac-C <sub>4</sub> H <sub>4</sub> O] <sup>-</sup><br>621.4371[M-H-CO <sub>2</sub> -Ac-C <sub>4</sub> H <sub>4</sub> O-2Glc] <sup>-</sup>                                | 1055.5874[M-H-CO <sub>2</sub> ] <sup>-</sup><br>783.52797[M-H-CO <sub>2</sub> -Ac-C <sub>4</sub> H <sub>4</sub> O-Glc] <sup>-</sup><br>459.3907[M-H-CO <sub>2</sub> -Ac-C <sub>4</sub> H <sub>4</sub> O-3Glc] <sup>-</sup> | 1013.5702[M-H-CO <sub>2</sub> -Ac] <sup>-</sup><br>783.52797[M-H-CO <sub>2</sub> -Ac-C <sub>4</sub> H <sub>4</sub> O-Glc] <sup>-</sup>                                | PPD/PPD-C17-<br>V4-Glc-Glc-Glc-<br>butene acyl-<br>malonyl | butene acyl-<br>malonyl-Rd    | C <sub>55</sub> H <sub>88</sub> O <sub>22</sub> | 1100.5767 | L5,L15,Y5,N5 | -0.55 |
| 67 | 12.3  | 799.4819  | 799.4771[M+FA-H] <sup>-</sup><br>475.3784[M-H-Rha-Xyl/Ara] <sup>-</sup>                                                                                                                                                             | 753.4806[M-H] <sup>-</sup><br>607.4226[M-H-Rha] <sup>-</sup>                                                                                                                                                               | 607.4226[M-H-Rha] <sup>-</sup>                                                                                                                                        | PPT-Xyl/Ara-<br>Rha                                        | PPTXR                         | C <sub>41</sub> H <sub>70</sub> O <sub>12</sub> | 754.4867  | L15,N5       | -2.26 |
| 68 | 13.84 | 837.4989  | 837.5072[M-H] <sup>-</sup><br>475.3821[M-H-C <sub>4</sub> H <sub>4</sub> O-Xyl/Ara-Glc] <sup>-</sup>                                                                                                                                | 769.4752[M-HC <sub>4</sub> H <sub>4</sub> O] <sup>-</sup><br>637.4264[M-H-C <sub>4</sub> H <sub>4</sub> O-Xyl/Ara] <sup>-</sup>                                                                                            | 637.4264[M-H-C <sub>4</sub> H <sub>4</sub> O-Xyl/Ara] <sup>-</sup>                                                                                                    | PPT-Glc-<br>Xyl/Ara-butene<br>acyl                         | butene acyl-<br>F3            | C <sub>45</sub> H <sub>74</sub> O <sub>14</sub> | 838.5079  | L5,L15,Y5    | 1.43  |
| 69 | 13.89 | 851.4765  | 807.4902[M-H-CO <sub>2</sub> ] <sup>-</sup><br>603.4176[M-H-CO <sub>2</sub> -Ac-Glc] <sup>-</sup>                                                                                                                                   | 765.4788[M-H-CO <sub>2</sub> -Ac] <sup>-</sup><br>441.3685[M-H-CO <sub>2</sub> -Ac-2Glc] <sup>-</sup>                                                                                                                      | 747.4723[M-H-CO <sub>2</sub> -Ac-H <sub>2</sub> O] <sup>-</sup><br>441.3685[M-H-CO <sub>2</sub> -Ac-2Glc] <sup>-</sup>                                                | PPD-C17-<br>V1/V2-Glc-Glc-<br>malonyl                      | malonyl-<br>Rk1               | C <sub>45</sub> H <sub>72</sub> O <sub>15</sub> | 852.4871  | L5,L15LY5LN5 | 3.29  |
| 70 | 14.06 | 681.4182  | 681.4309[M+FA-H] <sup>-</sup><br>1145.6066[M-H] <sup>-</sup>                                                                                                                                                                        | 635.4208[M-H] <sup>-</sup><br>1077.6177[M-H-C <sub>4</sub> H <sub>4</sub> O] <sup>-</sup>                                                                                                                                  | 473.3624[M-H-Glc] <sup>-</sup><br>945.5502[M-H-C <sub>4</sub> H <sub>4</sub> O-Xyl/Ara] <sup>-</sup>                                                                  | PPT-C17-V5-Glc                                             | Rh6                           | C <sub>36</sub> H <sub>60</sub> O <sub>9</sub>  | 636.4237  | L5,L15,Y5    | -7.71 |
| 71 | 14.91 | 1145.6067 | 799.5008[M-H-C <sub>4</sub> H <sub>4</sub> O-Xyl/Ara-Rha] <sup>-</sup><br>637.4499[M-H-C <sub>4</sub> H <sub>4</sub> O-Xyl/Ara-Rha-Glc] <sup>-</sup><br>475.3885[M-H-C <sub>4</sub> H <sub>4</sub> O-Xyl/Ara-Rha-2Glc] <sup>-</sup> | 781.4819[M-H-C <sub>4</sub> H <sub>4</sub> O-Xyl/Ara-Rha-H <sub>2</sub> O] <sup>-</sup><br>637.4499[M-H-C <sub>4</sub> H <sub>4</sub> O-Xyl/Ara-Rha-Glc] <sup>-</sup>                                                      | 781.4819[M-H-C <sub>4</sub> H <sub>4</sub> O-Xyl/Ara-Rha-H <sub>2</sub> O] <sup>-</sup><br>637.4499[M-H-C <sub>4</sub> H <sub>4</sub> O-Xyl/Ara-Rha-Glc] <sup>-</sup> | PPT-Glc-Glc-<br>Rha-Xyl/Ara-<br>butene acyl                | butene acyl-<br>Re-X          | C <sub>57</sub> H <sub>94</sub> O <sub>23</sub> | 1146.6186 | L5,L15,Y5,N5 | 3.58  |
| 72 | 14.99 | 957.5413  | 957.5446[M-H] <sup>-</sup><br>621.4494[M-H-Ac-Xyl/Ara-Glc] <sup>-</sup>                                                                                                                                                             | 915.5333[M-H-Ac] <sup>-</sup><br>459.3788[M-H-Ac-Xyl/Ara-2Glc] <sup>-</sup>                                                                                                                                                | 783.4858[M-H-Ac-Xyl/Ara] <sup>-</sup><br>459.3788[M-H-Ac-Xyl/Ara-2Glc] <sup>-</sup>                                                                                   | PPD/PPD-C17-<br>V4-Glc-Glc-<br>Xyl/Ara-acetyl              | acetyl-CS-<br>IIIC            | C <sub>49</sub> H <sub>82</sub> O <sub>18</sub> | 958.5501  | L5,L15,Y5,N5 | 1.04  |
| 73 | 15.19 | 665.4269  | 665.4262[M+FA-H] <sup>-</sup><br>619.4147[M-H] <sup>-</sup>                                                                                                                                                                         | 619.4147[M-H] <sup>-</sup><br>473.4978[M-H-Rha] <sup>-</sup>                                                                                                                                                               | 473.4978[M-H-Rha] <sup>-</sup>                                                                                                                                        | PPT-C17-V5-<br>Rha                                         | RH7                           | C <sub>36</sub> H <sub>60</sub> O <sub>8</sub>  | 620.4288  | L5,L15,Y5,N5 | 10.00 |

|    |       |          |                                   |                                       |                                                |                |            |                                                 |          |           |      |  |
|----|-------|----------|-----------------------------------|---------------------------------------|------------------------------------------------|----------------|------------|-------------------------------------------------|----------|-----------|------|--|
|    |       |          | 971.5585[M-H] <sup>-</sup>        | 929.5492[M-H-Ac] <sup>-</sup>         | 911.5554[M-H-Ac-H <sub>2</sub> O] <sup>-</sup> | PPD/C17(D)-V4- |            |                                                 |          |           |      |  |
| 74 | 16.52 | 971.5564 | 783.4815[M-H-Ac-Rha] <sup>-</sup> | 621.4260[M-H-Ac-Rha-Glc] <sup>-</sup> | 459.2371[M-H-                                  | Glc-Glc-Rha-   | acetyl-F2- | C <sub>50</sub> H <sub>84</sub> O <sub>18</sub> | 972.5658 | L5,L15,N5 | 1.65 |  |
|    |       |          | Ac-Rha-2Glc] <sup>-</sup>         |                                       |                                                | acetyl         | R2         |                                                 |          |           |      |  |
| 75 | 25.68 | 667.4005 | 667.4005[M-H] <sup>-</sup>        | 491.3416[M-H-GlcA] <sup>-</sup>       |                                                | PG-GlcA        | PG-GA      | C <sub>36</sub> H <sub>60</sub> O <sub>11</sub> | 668.4136 | L5,L15,Y5 | 7.94 |  |

**Table S3** Semi-quantitative contents of 312 ginsenosides

| Rt   | L15      | Y5       | N5       | L5       | Rt    | L15      | Y5       | N5       | L5       |
|------|----------|----------|----------|----------|-------|----------|----------|----------|----------|
| 1.18 | 4.90E+04 | 1.10E+05 | 8.50E+04 | 4.10E+04 | 9.06  | 6.00E+04 | 8.10E+04 | 4.80E+04 | 1.10E+05 |
| 1.25 | 2.60E+04 | 4.20E+04 | 8.20E+03 | 9.80E+03 | 9.06  | 3.90E+04 | 3.20E+04 | 3.30E+04 | 5.20E+04 |
| 1.37 | 1.60E+04 | 3.00E+04 | 2.20E+04 | 9.90E+03 | 9.08  | 3.60E+04 | 4.70E+04 | 2.50E+04 | 3.40E+04 |
| 1.39 | 1.10E+04 | 4.50E+04 | 1.80E+04 | 0.00E+00 | 9.09  | 7.10E+06 | 6.70E+06 | 4.50E+06 | 3.30E+06 |
| 1.40 | 1.00E+04 | 4.70E+04 | 1.60E+04 | 3.00E+03 | 9.09  | 4.30E+06 | 3.10E+06 | 2.60E+06 | 1.80E+06 |
| 1.48 | 0.00E+00 | 0.00E+00 | 0.00E+00 | 4.10E+03 | 9.09  | 4.30E+06 | 3.10E+06 | 2.60E+06 | 1.80E+06 |
| 1.50 | 4.90E+04 | 4.90E+04 | 4.10E+04 | 2.20E+04 | 9.15  | 1.60E+04 | 1.50E+04 | 1.20E+04 | 6.10E+03 |
| 1.54 | 0.00E+00 | 4.30E+03 | 0.00E+00 | 0.00E+00 | 9.49  | 3.60E+03 | 3.70E+03 | 2.10E+03 | 3.20E+03 |
| 1.62 | 6.60E+04 | 5.60E+04 | 4.30E+05 | 1.60E+04 | 9.52  | 1.50E+03 | 4.40E+03 | 1.80E+03 | 2.30E+03 |
| 1.62 | 4.70E+04 | 2.60E+04 | 3.40E+04 | 1.10E+04 | 9.61  | 0.00E+00 | 3.70E+03 | 1.60E+03 | 0.00E+00 |
| 1.63 | 1.40E+04 | 2.70E+05 | 3.80E+05 | 3.40E+04 | 9.66  | 3.50E+04 | 2.60E+03 | 9.30E+03 | 8.00E+03 |
| 1.69 | 1.40E+04 | 0.00E+00 | 1.20E+04 | 8.30E+03 | 9.67  | 0.00E+00 | 1.60E+04 | 3.10E+03 | 1.80E+03 |
| 1.79 | 7.20E+04 | 5.20E+04 | 3.30E+05 | 4.10E+04 | 9.75  | 3.40E+03 | 7.50E+03 | 4.90E+03 | 6.60E+03 |
| 1.87 | 4.50E+03 | 3.70E+03 | 2.70E+03 | 0.00E+00 | 9.77  | 0.00E+00 | 6.90E+04 | 5.60E+04 | 9.20E+04 |
| 1.89 | 1.80E+06 | 1.00E+06 | 8.40E+05 | 8.00E+04 | 9.78  | 2.70E+04 | 3.80E+04 | 2.20E+04 | 1.80E+04 |
| 1.90 | 2.70E+04 | 1.40E+04 | 2.80E+04 | 3.10E+04 | 9.81  | 1.20E+04 | 1.10E+04 | 0.00E+00 | 3.30E+03 |
| 1.90 | 2.70E+04 | 1.40E+04 | 2.80E+04 | 3.10E+04 | 9.83  | 1.00E+06 | 5.40E+06 | 2.50E+06 | 2.40E+05 |
| 1.93 | 7.70E+03 | 5.50E+04 | 0.00E+00 | 0.00E+00 | 9.83  | 2.80E+05 | 2.70E+06 | 1.40E+06 | 1.10E+05 |
| 1.95 | 2.90E+04 | 1.60E+04 | 1.50E+04 | 1.70E+04 | 9.85  | 1.70E+04 | 1.00E+04 | 1.70E+04 | 8.70E+04 |
| 1.96 | 2.70E+04 | 1.20E+04 | 2.50E+04 | 1.20E+04 | 9.90  | 0.00E+00 | 4.70E+04 | 2.20E+04 | 1.50E+04 |
| 2.02 | 1.40E+04 | 1.10E+05 | 6.90E+04 | 2.00E+04 | 9.91  | 3.30E+05 | 3.00E+05 | 2.40E+05 | 2.30E+05 |
| 2.21 | 9.90E+04 | 7.20E+04 | 4.80E+04 | 5.70E+05 | 9.91  | 1.50E+05 | 1.60E+05 | 1.30E+05 | 1.60E+05 |
| 2.21 | 1.10E+05 | 1.00E+06 | 3.60E+04 | 5.80E+05 | 9.97  | 6.40E+04 | 1.70E+05 | 5.80E+04 | 3.80E+04 |
| 2.25 | 9.00E+04 | 3.70E+05 | 6.00E+05 | 1.30E+06 | 10.15 | 0.00E+00 | 0.00E+00 | 3.10E+03 | 2.30E+03 |
| 2.34 | 5.10E+04 | 3.80E+04 | 2.00E+04 | 6.70E+03 | 10.17 | 0.00E+00 | 0.00E+00 | 1.80E+03 | 1.20E+03 |
| 2.36 | 0.00E+00 | 0.00E+00 | 0.00E+00 | 3.10E+03 | 10.22 | 3.60E+04 | 2.70E+04 | 2.10E+04 | 2.50E+04 |
| 2.48 | 3.40E+03 | 0.00E+00 | 2.50E+03 | 2.90E+03 | 10.25 | 1.10E+05 | 2.10E+05 | 9.60E+04 | 1.20E+05 |
| 2.72 | 1.50E+03 | 5.50E+03 | 3.50E+03 | 1.30E+03 | 10.31 | 2.10E+04 | 3.00E+04 | 2.40E+04 | 2.20E+04 |
| 2.74 | 1.30E+04 | 1.20E+04 | 6.20E+03 | 1.10E+04 | 10.39 | 8.50E+03 | 5.20E+03 | 1.10E+04 | 8.60E+03 |
| 2.77 | 1.10E+04 | 9.80E+03 | 5.10E+03 | 1.80E+04 | 10.39 | 5.90E+03 | 2.60E+03 | 6.60E+03 | 8.90E+03 |
| 2.82 | 4.70E+03 | 4.20E+03 | 1.80E+03 | 1.60E+03 | 10.42 | 0.00E+00 | 3.60E+04 | 3.30E+03 | 7.20E+04 |
| 2.83 | 1.80E+04 | 1.10E+04 | 1.30E+04 | 3.60E+03 | 10.42 | 1.40E+05 | 1.60E+05 | 6.10E+04 | 7.70E+04 |
| 2.87 | 3.70E+04 | 0.00E+00 | 2.20E+04 | 1.60E+04 | 10.47 | 6.00E+03 | 1.80E+04 | 8.90E+03 | 0.00E+00 |
| 3.00 | 7.10E+04 | 9.40E+04 | 2.00E+04 | 2.10E+04 | 10.49 | 7.70E+06 | 1.10E+07 | 6.20E+06 | 6.80E+06 |
| 3.20 | 1.80E+04 | 2.40E+04 | 8.40E+03 | 3.60E+03 | 10.55 | 1.30E+06 | 9.50E+05 | 7.90E+05 | 1.20E+06 |
| 3.30 | 0.00E+00 | 4.70E+03 | 0.00E+00 | 0.00E+00 | 10.55 | 1.30E+06 | 9.50E+05 | 7.90E+05 | 1.20E+06 |
| 3.35 | 0.00E+00 | 6.20E+03 | 4.30E+03 | 3.70E+03 | 10.64 | 2.90E+04 | 2.80E+04 | 1.90E+04 | 1.20E+04 |
| 3.36 | 0.00E+00 | 8.30E+04 | 2.70E+03 | 3.20E+03 | 10.64 | 4.60E+04 | 5.10E+04 | 2.90E+04 | 2.90E+04 |
| 3.38 | 1.30E+05 | 6.30E+04 | 1.60E+04 | 4.20E+04 | 10.78 | 0.00E+00 | 0.00E+00 | 0.00E+00 | 2.10E+03 |
| 3.67 | 7.80E+03 | 4.60E+04 | 2.20E+04 | 1.20E+04 | 10.82 | 9.40E+04 | 8.00E+04 | 5.20E+04 | 1.90E+05 |
| 3.68 | 3.60E+05 | 6.10E+05 | 3.10E+05 | 1.70E+05 | 10.84 | 0.00E+00 | 3.00E+03 | 0.00E+00 | 6.70E+03 |

|      |          |          |          |          |       |          |          |          |          |
|------|----------|----------|----------|----------|-------|----------|----------|----------|----------|
| 3.82 | 0.00E+00 | 9.30E+03 | 5.30E+03 | 9.40E+02 | 10.97 | 1.00E+04 | 2.50E+04 | 1.50E+04 | 6.70E+03 |
| 3.97 | 0.00E+00 | 3.50E+04 | 5.90E+03 | 0.00E+00 | 10.97 | 2.30E+05 | 1.80E+05 | 1.60E+05 | 1.50E+05 |
| 4.15 | 0.00E+00 | 2.10E+03 | 0.00E+00 | 0.00E+00 | 10.98 | 4.50E+03 | 3.10E+03 | 2.50E+03 | 2.20E+03 |
| 4.48 | 1.60E+05 | 2.40E+06 | 9.60E+05 | 4.00E+05 | 11.04 | 1.30E+05 | 2.40E+05 | 7.90E+04 | 1.50E+05 |
| 4.61 | 1.80E+03 | 2.60E+05 | 9.70E+02 | 1.30E+05 | 11.06 | 1.80E+06 | 3.00E+06 | 1.20E+06 | 2.20E+06 |
| 4.64 | 1.70E+05 | 1.50E+05 | 8.70E+04 | 3.70E+04 | 11.12 | 4.50E+03 | 6.50E+03 | 3.30E+03 | 2.40E+03 |
| 4.66 | 4.60E+03 | 1.50E+03 | 4.90E+03 | 6.50E+03 | 11.12 | 4.50E+03 | 6.50E+03 | 3.30E+03 | 2.40E+03 |
| 4.68 | 0.00E+00 | 2.20E+04 | 7.40E+03 | 0.00E+00 | 11.16 | 8.90E+04 | 6.00E+04 | 4.10E+04 | 3.90E+04 |
| 4.68 | 2.30E+04 | 3.30E+03 | 4.90E+04 | 8.60E+03 | 11.16 | 4.50E+04 | 3.60E+04 | 1.70E+04 | 2.60E+04 |
| 4.73 | 2.30E+06 | 1.80E+06 | 6.10E+05 | 3.00E+05 | 11.19 | 2.90E+03 | 3.70E+03 | 2.20E+03 | 2.10E+03 |
| 4.81 | 0.00E+00 | 0.00E+00 | 3.90E+03 | 1.60E+03 | 11.36 | 0.00E+00 | 5.30E+03 | 4.00E+03 | 0.00E+00 |
| 4.82 | 4.30E+04 | 4.00E+04 | 3.40E+04 | 2.40E+04 | 11.42 | 3.20E+04 | 5.00E+04 | 2.20E+04 | 1.40E+04 |
| 4.85 | 7.20E+03 | 2.40E+05 | 6.00E+04 | 0.00E+00 | 11.43 | 9.00E+03 | 5.60E+03 | 5.90E+03 | 2.20E+03 |
| 4.90 | 7.50E+03 | 9.00E+03 | 3.50E+03 | 4.90E+03 | 11.55 | 5.70E+06 | 5.50E+06 | 3.90E+06 | 4.10E+06 |
| 4.91 | 5.40E+03 | 9.70E+03 | 3.90E+03 | 4.40E+03 | 11.55 | 5.70E+06 | 5.50E+06 | 3.90E+06 | 4.10E+06 |
| 4.91 | 5.00E+03 | 5.70E+03 | 2.90E+03 | 3.90E+03 | 11.58 | 6.30E+03 | 4.30E+03 | 4.50E+03 | 2.80E+04 |
| 4.94 | 5.30E+04 | 3.00E+04 | 1.40E+04 | 1.00E+04 | 11.60 | 3.10E+03 | 3.20E+03 | 2.50E+03 | 0.00E+00 |
| 5.04 | 3.60E+03 | 3.00E+03 | 1.40E+03 | 4.00E+03 | 11.68 | 1.60E+04 | 8.70E+03 | 1.50E+04 | 1.40E+04 |
| 5.19 | 8.00E+04 | 0.00E+00 | 0.00E+00 | 0.00E+00 | 11.77 | 6.50E+04 | 2.40E+04 | 1.40E+04 | 2.30E+04 |
| 5.19 | 3.30E+05 | 3.40E+06 | 1.20E+06 | 6.60E+04 | 11.82 | 4.30E+04 | 3.70E+04 | 1.40E+04 | 2.10E+04 |
| 5.22 | 8.80E+04 | 8.20E+04 | 7.80E+04 | 8.10E+04 | 11.82 | 3.30E+04 | 3.30E+04 | 1.80E+04 | 2.20E+04 |
| 5.23 | 1.20E+04 | 6.80E+03 | 0.00E+00 | 0.00E+00 | 11.91 | 3.00E+03 | 3.60E+03 | 2.00E+04 | 5.90E+03 |
| 5.24 | 0.00E+00 | 2.50E+04 | 1.50E+04 | 5.00E+03 | 11.97 | 7.10E+03 | 2.90E+03 | 0.00E+00 | 6.90E+03 |
| 5.27 | 0.00E+00 | 5.00E+03 | 2.10E+03 | 0.00E+00 | 12.00 | 4.00E+04 | 1.00E+05 | 4.00E+04 | 3.00E+04 |
| 5.28 | 0.00E+00 | 0.00E+00 | 0.00E+00 | 6.60E+03 | 12.00 | 0.00E+00 | 1.10E+04 | 7.60E+03 | 0.00E+00 |
| 5.30 | 4.80E+04 | 4.50E+04 | 0.00E+00 | 3.70E+04 | 12.03 | 1.60E+04 | 2.50E+04 | 1.70E+04 | 3.30E+04 |
| 5.34 | 3.60E+05 | 4.60E+05 | 4.80E+05 | 2.10E+05 | 12.07 | 2.90E+06 | 3.40E+06 | 9.50E+05 | 1.40E+06 |
| 5.35 | 1.40E+04 | 9.90E+03 | 1.10E+04 | 9.40E+03 | 12.08 | 3.80E+04 | 3.20E+04 | 1.30E+04 | 5.10E+04 |
| 5.44 | 4.70E+05 | 9.90E+04 | 1.80E+05 | 1.40E+05 | 12.10 | 1.70E+04 | 3.30E+04 | 1.50E+04 | 1.40E+04 |
| 5.46 | 2.10E+04 | 2.90E+04 | 1.50E+04 | 1.90E+04 | 12.14 | 1.50E+04 | 6.30E+04 | 3.50E+04 | 1.90E+04 |
| 5.47 | 1.30E+06 | 3.50E+05 | 4.10E+05 | 3.80E+05 | 12.17 | 7.20E+03 | 0.00E+00 | 5.60E+03 | 2.20E+03 |
| 5.52 | 2.00E+04 | 1.10E+05 | 7.60E+04 | 1.60E+04 | 12.18 | 2.20E+04 | 9.70E+03 | 1.40E+04 | 8.20E+03 |
| 5.54 | 8.40E+03 | 5.50E+04 | 2.20E+04 | 6.60E+04 | 12.20 | 2.30E+04 | 1.30E+04 | 2.70E+04 | 2.20E+04 |
| 5.60 | 1.70E+03 | 1.70E+04 | 0.00E+00 | 5.30E+04 | 12.30 | 7.00E+03 | 1.90E+03 | 3.40E+03 | 2.60E+03 |
| 5.62 | 0.00E+00 | 6.50E+03 | 0.00E+00 | 0.00E+00 | 12.30 | 0.00E+00 | 2.20E+03 | 0.00E+00 | 2.00E+03 |
| 5.76 | 1.20E+04 | 1.20E+04 | 0.00E+00 | 0.00E+00 | 12.31 | 1.60E+04 | 1.30E+04 | 4.60E+04 | 5.60E+03 |
| 5.76 | 1.20E+04 | 1.40E+04 | 0.00E+00 | 0.00E+00 | 12.36 | 1.00E+04 | 1.10E+04 | 1.60E+04 | 1.50E+04 |
| 5.77 | 1.30E+07 | 1.30E+07 | 1.00E+07 | 6.60E+06 | 12.40 | 3.30E+04 | 5.90E+03 | 2.10E+04 | 3.20E+04 |
| 5.81 | 5.40E+06 | 6.00E+06 | 1.30E+07 | 1.10E+07 | 12.45 | 1.10E+05 | 6.30E+05 | 3.20E+05 | 4.90E+05 |
| 5.92 | 5.60E+04 | 2.70E+05 | 1.80E+05 | 1.30E+04 | 12.56 | 2.90E+06 | 3.60E+06 | 2.40E+06 | 3.10E+06 |
| 5.94 | 0.00E+00 | 4.30E+04 | 1.60E+04 | 0.00E+00 | 12.68 | 0.00E+00 | 1.10E+04 | 3.10E+03 | 9.60E+03 |
| 6.03 | 7.10E+04 | 5.10E+04 | 9.00E+03 | 1.90E+04 | 12.76 | 1.80E+03 | 4.60E+03 | 1.80E+03 | 4.70E+03 |
| 6.07 | 1.90E+04 | 1.10E+04 | 0.00E+00 | 0.00E+00 | 12.79 | 6.70E+04 | 9.50E+04 | 4.40E+04 | 3.60E+04 |
| 6.09 | 7.40E+03 | 0.00E+00 | 5.30E+03 | 6.50E+03 | 12.90 | 7.10E+05 | 6.80E+05 | 5.50E+05 | 6.10E+05 |

|      |          |          |          |          |       |          |          |          |          |
|------|----------|----------|----------|----------|-------|----------|----------|----------|----------|
| 6.09 | 0.00E+00 | 1.00E+04 | 5.70E+03 | 0.00E+00 | 12.90 | 7.10E+05 | 6.80E+05 | 5.50E+05 | 6.10E+05 |
| 6.12 | 2.70E+04 | 3.60E+04 | 9.80E+03 | 0.00E+00 | 12.99 | 6.60E+03 | 3.80E+03 | 3.20E+03 | 5.10E+03 |
| 6.13 | 4.90E+04 | 3.60E+04 | 3.60E+04 | 7.00E+04 | 13.00 | 2.60E+04 | 1.50E+04 | 1.20E+04 | 4.10E+04 |
| 6.14 | 0.00E+00 | 1.40E+05 | 7.10E+04 | 4.90E+05 | 13.05 | 5.10E+05 | 4.40E+05 | 3.70E+05 | 1.90E+05 |
| 6.14 | 0.00E+00 | 7.20E+04 | 9.10E+04 | 0.00E+00 | 13.18 | 6.20E+04 | 6.40E+04 | 3.80E+04 | 6.10E+04 |
| 6.15 | 6.40E+03 | 1.40E+06 | 1.90E+06 | 2.50E+06 | 13.19 | 3.90E+04 | 8.30E+03 | 1.60E+04 | 1.00E+04 |
| 6.15 | 0.00E+00 | 3.80E+04 | 0.00E+00 | 0.00E+00 | 13.42 | 9.50E+04 | 5.70E+04 | 1.50E+05 | 6.40E+04 |
| 6.16 | 7.30E+04 | 2.30E+05 | 2.60E+05 | 4.30E+05 | 13.45 | 7.10E+03 | 5.90E+04 | 2.40E+04 | 2.80E+04 |
| 6.18 | 5.70E+03 | 4.80E+04 | 1.60E+04 | 2.50E+04 | 13.49 | 1.80E+03 | 4.30E+03 | 3.70E+04 | 1.80E+04 |
| 6.19 | 6.10E+04 | 4.20E+04 | 0.00E+00 | 6.10E+04 | 13.57 | 9.90E+03 | 5.20E+03 | 2.70E+03 | 2.40E+03 |
| 6.20 | 8.90E+03 | 8.50E+03 | 8.10E+03 | 1.70E+04 | 13.77 | 1.30E+04 | 9.30E+03 | 2.80E+03 | 3.00E+03 |
| 6.20 | 1.80E+04 | 1.20E+04 | 9.50E+03 | 0.00E+00 | 13.78 | 1.10E+05 | 5.80E+05 | 1.90E+05 | 9.00E+05 |
| 6.26 | 0.00E+00 | 0.00E+00 | 1.20E+05 | 0.00E+00 | 13.78 | 7.10E+04 | 1.00E+05 | 4.30E+05 | 4.20E+04 |
| 6.29 | 0.00E+00 | 3.40E+04 | 4.30E+04 | 3.00E+04 | 13.81 | 3.90E+03 | 0.00E+00 | 0.00E+00 | 1.30E+03 |
| 6.29 | 1.20E+07 | 1.20E+07 | 1.10E+07 | 9.20E+06 | 13.84 | 1.90E+03 | 4.60E+03 | 5.10E+03 | 0.00E+00 |
| 6.37 | 0.00E+00 | 1.30E+04 | 0.00E+00 | 1.20E+04 | 13.89 | 1.10E+04 | 1.80E+04 | 9.10E+03 | 6.20E+03 |
| 6.39 | 5.60E+03 | 5.10E+03 | 1.10E+04 | 1.10E+04 | 13.89 | 1.20E+03 | 1.50E+03 | 2.10E+03 | 1.60E+03 |
| 6.43 | 8.30E+03 | 2.80E+03 | 0.00E+00 | 0.00E+00 | 14.06 | 2.00E+03 | 2.50E+03 | 2.50E+03 | 0.00E+00 |
| 6.51 | 6.20E+03 | 2.10E+04 | 1.20E+04 | 0.00E+00 | 14.08 | 4.90E+04 | 5.60E+04 | 1.90E+04 | 2.80E+04 |
| 6.52 | 1.10E+04 | 3.10E+04 | 3.50E+04 | 8.00E+03 | 14.10 | 1.10E+03 | 1.50E+03 | 0.00E+00 | 0.00E+00 |
| 6.54 | 0.00E+00 | 3.90E+03 | 3.80E+03 | 3.00E+03 | 14.26 | 4.20E+04 | 5.80E+04 | 3.00E+04 | 1.50E+05 |
| 6.54 | 0.00E+00 | 5.10E+03 | 3.40E+03 | 0.00E+00 | 14.39 | 3.50E+04 | 1.00E+04 | 6.80E+03 | 1.00E+04 |
| 6.64 | 0.00E+00 | 2.50E+04 | 0.00E+00 | 0.00E+00 | 14.39 | 1.40E+04 | 1.00E+04 | 2.80E+03 | 6.10E+03 |
| 6.68 | 6.70E+03 | 6.70E+03 | 0.00E+00 | 0.00E+00 | 14.46 | 2.30E+03 | 1.80E+04 | 3.80E+03 | 2.80E+03 |
| 6.74 | 1.70E+05 | 1.50E+05 | 7.30E+04 | 5.10E+04 | 14.50 | 9.30E+03 | 1.40E+04 | 5.10E+03 | 0.00E+00 |
| 6.81 | 1.20E+05 | 1.50E+05 | 1.40E+05 | 1.10E+05 | 14.50 | 1.80E+03 | 3.00E+03 | 1.20E+03 | 1.40E+03 |
| 6.95 | 0.00E+00 | 0.00E+00 | 5.90E+03 | 5.00E+03 | 14.68 | 6.40E+04 | 5.50E+04 | 7.30E+04 | 6.90E+04 |
| 6.98 | 5.00E+06 | 4.20E+06 | 5.00E+06 | 4.20E+06 | 14.68 | 3.80E+04 | 5.30E+04 | 2.00E+04 | 1.70E+04 |
| 7.04 | 1.00E+04 | 1.10E+04 | 5.40E+03 | 2.30E+04 | 14.68 | 4.20E+04 | 2.50E+04 | 1.60E+04 | 2.40E+04 |
| 7.08 | 5.20E+06 | 4.20E+06 | 3.60E+06 | 4.20E+06 | 14.83 | 8.80E+03 | 7.60E+03 | 2.90E+03 | 3.90E+03 |
| 7.13 | 2.70E+05 | 1.70E+05 | 1.10E+05 | 8.90E+04 | 14.83 | 8.80E+03 | 7.60E+03 | 2.90E+03 | 3.90E+03 |
| 7.13 | 2.50E+05 | 3.80E+05 | 4.00E+05 | 5.30E+05 | 14.91 | 1.70E+03 | 2.10E+03 | 3.40E+03 | 2.00E+03 |
| 7.17 | 7.60E+03 | 1.30E+04 | 2.00E+04 | 8.40E+03 | 14.98 | 2.70E+03 | 4.40E+03 | 2.80E+03 | 3.80E+03 |
| 7.27 | 0.00E+00 | 5.60E+04 | 1.80E+04 | 1.40E+04 | 14.99 | 1.40E+04 | 1.10E+04 | 2.90E+03 | 1.00E+04 |
| 7.29 | 2.50E+04 | 1.40E+04 | 0.00E+00 | 0.00E+00 | 15.19 | 1.10E+04 | 8.50E+03 | 4.20E+03 | 4.50E+03 |
| 7.36 | 2.10E+04 | 3.20E+04 | 1.50E+04 | 1.10E+04 | 15.34 | 1.80E+03 | 1.80E+03 | 1.00E+03 | 7.70E+02 |
| 7.41 | 1.20E+06 | 2.50E+06 | 2.20E+06 | 4.00E+06 | 15.39 | 1.10E+04 | 2.00E+04 | 1.90E+04 | 1.60E+04 |
| 7.44 | 1.90E+04 | 1.30E+04 | 6.00E+03 | 3.50E+03 | 15.60 | 8.40E+03 | 8.40E+03 | 2.60E+03 | 1.30E+04 |
| 7.45 | 0.00E+00 | 1.20E+04 | 0.00E+00 | 0.00E+00 | 16.16 | 0.00E+00 | 3.30E+03 | 9.90E+02 | 0.00E+00 |
| 7.48 | 7.90E+04 | 5.00E+04 | 8.80E+05 | 1.10E+06 | 16.18 | 2.90E+04 | 4.50E+04 | 9.70E+02 | 4.20E+04 |
| 7.49 | 0.00E+00 | 5.00E+04 | 3.90E+04 | 3.50E+04 | 16.18 | 2.90E+04 | 4.50E+04 | 9.70E+02 | 4.20E+04 |
| 7.52 | 6.40E+04 | 9.00E+04 | 0.00E+00 | 3.20E+04 | 16.46 | 5.90E+03 | 9.50E+03 | 3.80E+03 | 6.40E+03 |
| 7.54 | 1.50E+05 | 1.30E+05 | 1.10E+05 | 8.90E+04 | 16.52 | 1.10E+03 | 2.90E+03 | 0.00E+00 | 1.70E+03 |
| 7.65 | 0.00E+00 | 9.50E+03 | 5.70E+03 | 1.10E+03 | 16.97 | 1.70E+04 | 3.40E+04 | 1.70E+04 | 2.10E+04 |

|      |          |          |          |          |       |          |          |          |          |
|------|----------|----------|----------|----------|-------|----------|----------|----------|----------|
| 7.69 | 5.50E+03 | 3.70E+03 | 3.00E+03 | 1.50E+03 | 17.01 | 1.10E+03 | 2.50E+03 | 1.30E+03 | 1.70E+03 |
| 7.71 | 2.50E+04 | 7.50E+04 | 4.20E+04 | 3.50E+04 | 17.01 | 1.10E+03 | 2.50E+03 | 1.30E+03 | 1.70E+03 |
| 7.76 | 0.00E+00 | 4.90E+03 | 1.70E+03 | 1.50E+03 | 17.18 | 5.30E+03 | 1.10E+04 | 1.80E+03 | 8.90E+03 |
| 7.80 | 1.40E+04 | 2.60E+04 | 1.30E+04 | 2.00E+04 | 17.35 | 2.40E+03 | 4.20E+03 | 2.20E+03 | 2.50E+03 |
| 7.80 | 1.20E+04 | 1.80E+04 | 9.70E+03 | 7.00E+03 | 17.55 | 5.80E+03 | 0.00E+00 | 7.70E+03 | 1.30E+04 |
| 7.84 | 0.00E+00 | 1.10E+04 | 0.00E+00 | 0.00E+00 | 17.70 | 1.30E+03 | 0.00E+00 | 1.90E+03 | 6.00E+03 |
| 7.90 | 2.90E+04 | 2.00E+04 | 2.20E+04 | 2.60E+04 | 18.33 | 2.10E+04 | 6.40E+03 | 3.30E+03 | 9.10E+03 |
| 7.97 | 9.50E+05 | 3.40E+05 | 7.10E+05 | 2.30E+05 | 18.33 | 2.10E+05 | 6.40E+03 | 3.30E+03 | 9.10E+03 |
| 7.97 | 0.00E+00 | 1.50E+04 | 2.00E+04 | 1.70E+04 | 18.44 | 0.00E+00 | 0.00E+00 | 0.00E+00 | 0.00E+00 |
| 7.98 | 1.80E+04 | 1.50E+04 | 1.50E+04 | 1.70E+04 | 18.44 | 0.00E+00 | 0.00E+00 | 0.00E+00 | 0.00E+00 |
| 8.09 | 6.40E+04 | 2.30E+06 | 2.60E+06 | 1.50E+06 | 18.45 | 1.60E+03 | 9.20E+02 | 2.00E+03 | 2.20E+03 |
| 8.19 | 6.40E+03 | 2.10E+04 | 1.60E+04 | 1.40E+04 | 19.06 | 7.10E+03 | 4.60E+03 | 1.10E+03 | 4.30E+03 |
| 8.19 | 1.60E+03 | 3.40E+03 | 2.20E+03 | 4.50E+03 | 19.07 | 0.00E+00 | 0.00E+00 | 0.00E+00 | 1.60E+03 |
| 8.25 | 9.20E+03 | 4.80E+03 | 3.80E+03 | 3.30E+03 | 19.90 | 3.40E+03 | 6.50E+02 | 9.30E+02 | 4.20E+03 |
| 8.29 | 3.00E+04 | 0.00E+00 | 1.80E+04 | 1.90E+04 | 19.93 | 3.60E+04 | 2.20E+04 | 5.60E+03 | 1.40E+04 |
| 8.31 | 5.90E+04 | 4.20E+04 | 4.40E+04 | 5.50E+04 | 20.06 | 3.40E+03 | 4.60E+03 | 6.30E+03 | 0.00E+00 |
| 8.34 | 1.70E+04 | 1.40E+04 | 7.70E+03 | 3.80E+03 | 20.68 | 1.40E+05 | 7.90E+04 | 1.50E+05 | 1.90E+04 |
| 8.38 | 1.60E+04 | 2.40E+04 | 2.10E+04 | 2.90E+04 | 21.02 | 1.40E+03 | 1.30E+03 | 1.40E+03 | 1.50E+03 |
| 8.40 | 1.60E+06 | 1.10E+06 | 9.20E+05 | 1.50E+06 | 21.02 | 1.40E+03 | 1.30E+03 | 1.40E+03 | 1.50E+03 |
| 8.60 | 1.10E+06 | 1.10E+06 | 3.20E+06 | 1.60E+06 | 21.29 | 1.80E+03 | 7.40E+02 | 2.90E+03 | 1.50E+03 |
| 8.66 | 4.10E+04 | 4.70E+04 | 2.50E+04 | 3.40E+04 | 21.68 | 2.90E+03 | 6.60E+03 | 4.00E+03 | 3.60E+03 |
| 8.69 | 0.00E+00 | 0.00E+00 | 0.00E+00 | 6.30E+03 | 21.91 | 4.40E+04 | 2.10E+04 | 1.10E+03 | 0.00E+00 |
| 8.75 | 3.50E+04 | 3.20E+04 | 2.00E+04 | 2.80E+04 | 23.72 | 1.20E+03 | 1.20E+03 | 1.30E+03 | 1.30E+03 |
| 8.77 | 1.50E+03 | 3.10E+04 | 1.30E+04 | 3.10E+03 | 23.72 | 1.20E+03 | 1.20E+03 | 1.30E+03 | 1.30E+03 |
| 8.90 | 5.40E+03 | 5.20E+03 | 1.70E+03 | 3.10E+03 | 25.54 | 3.70E+02 | 9.20E+02 | 8.80E+02 | 6.60E+02 |
| 8.98 | 9.20E+04 | 8.20E+04 | 7.90E+04 | 3.10E+04 | 25.54 | 3.70E+02 | 9.20E+02 | 8.80E+02 | 6.60E+02 |
| 9.06 | 7.20E+04 | 9.90E+04 | 8.80E+04 | 1.50E+05 | 25.68 | 1.10E+06 | 6.40E+05 | 2.40E+05 | 0.00E+00 |

---

**Table S4** Ginseng samples analyzed in this study

| Code no   | Location                              | Time or Batch No. | Age<br>(years) | category                               |
|-----------|---------------------------------------|-------------------|----------------|----------------------------------------|
| L15JC1-24 | Caiyuan Town Ji 'an, Jilin Province   | PL15JC0124        | 15             | Ginseng cultivated in the forest       |
| L15JC2-2  | Caiyuan Town Ji 'an, Jilin Province   | PL15JI0202        | 15             | Ginseng cultivated in the forest       |
| L5JC1-1   | Caiyuan Town Ji 'an, Jilin Province   | PL05JC0101        | 5              | Ginseng cultivated in the forest       |
| L5JC2-4   | Caiyuan Town Ji 'an, Jilin Province   | PL05JC0204        | 5              | Ginseng cultivated in the forest       |
| L5JC4-1   | Caiyuan Town Ji 'an, Jilin Province   | PL05JC0401        | 5              | Ginseng cultivated in the forest       |
| Y5JC1-10  | Caiyuan Town Ji 'an, Jilin Province   | PY05JC0110        | 5              | Ginseng cultivated in the<br>mountains |
| Y5JT2-1   | Taishang Town Ji 'an, Jilin Province  | PY05JT0201        | 5              | Ginseng cultivated in the<br>mountains |
| Y5JC3-9   | Caiyuan Town Ji 'an, Jilin Province   | PY05JC0309        | 5              | Ginseng cultivated in the<br>mountains |
| N5JM1-1   | Maxian Town Ji 'an, Jilin Province    | PN05JM0101        | 5              | Ginseng cultivated in farmland         |
| N5JY2-2   | Yulin Town Ji 'an, Jilin Province     | PN05JY0202        | 5              | Ginseng cultivated in farmland         |
| N5JL3-2   | Liangshui Town Ji 'an, Jilin Province | PN05JL0302        | 5              | Ginseng cultivated in farmland         |

**Table S5** Structure of the 63 ginsenoside standards

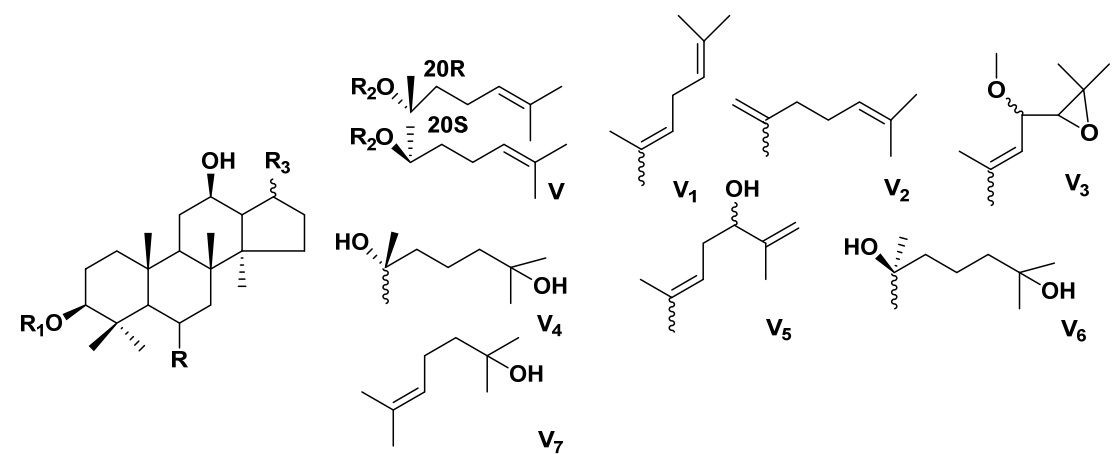

Protopanaxadiol&Protopanaxatriol (PPD&PPT)

| No. | Compound | R | R1           | R2                      | R3 | No. | Compound  | R      | R1 | R2 | R3 | No. | Compound | R             | R1 | R2 | R3 |
|-----|----------|---|--------------|-------------------------|----|-----|-----------|--------|----|----|----|-----|----------|---------------|----|----|----|
| 12  | NG R4    | - | -Glc(2-1)Glc | -Glc(6-1)Xyl            | -V | 26  | 20(S)-Rh1 | -O-Glc | -H | -H | -V | 38  | G Rg6    | -OGlc(2-1)Rha | -H | -  | V2 |
| 18  | G Ra2    | - | -Glc(2-1)Glc | -Glc(6-1)Ara(f)(2-1)Xyl | -V | 27  | 20(R)-Rh1 | -O-Glc | -H | -H | -V | 39  | F4       | -OGlc(2-1)Rha | -H | -  | V1 |

|    |                   |   |                   |                         |    |    |                       |               |    |      |    |    |                   |               |                   |   |        |
|----|-------------------|---|-------------------|-------------------------|----|----|-----------------------|---------------|----|------|----|----|-------------------|---------------|-------------------|---|--------|
| 19 | G Ra <sub>3</sub> | - | -Glc(2-1)Glc      | -Glc(6-1)Glc(3-1)Xyl    | -V | 7  | G Rg <sub>1</sub>     | -O-Glc        | -H | -Glc | -V | 42 | G Rk <sub>3</sub> | -OGlc         | -H                | - | V<br>2 |
| 21 | G Rb <sub>1</sub> | - | -Glc(2-1)Glc      | -Glc(6-1)Glc            | -V | 13 | 20(S)-Rf-1a           | -OGlc(4-1)Glc | -H | -H   | -V | 43 | G Rh <sub>4</sub> | -Glc          | -H                | - | V<br>1 |
| 24 | G Ra <sub>1</sub> | - | -Glc(2-1)Glc      | -Glc(6-1)Ara(p)(4-1)Xyl | -V | 14 | 20(S)-Rf              | -OGlc(2-1)Glc | -H | -H   | -V | 40 | DHDXG             | -OGlc(2-1)Xyl | -H                | - | V<br>1 |
| 25 | G Rc              | - | -Glc(2-1)Glc      | -Glc(6-1)Ara(f)         | -V | 15 | 20(R)-Rf              | -OGlc(2-1)Glc | -H | -H   | -V | 44 | G Rg <sub>9</sub> | -OGlc(2-1)Glc | -H                | - | V<br>1 |
| 28 | G Rb <sub>2</sub> | - | -Glc(2-1)Glc      | -Glc(6-1)Ara(p)         | -V | 22 | 20(S)-Rg <sub>2</sub> | -OGlc(2-1)Rha | -H | -H   | -V | 59 | DDT               | -OH           | -H                | - | V<br>2 |
| 29 | G Rb <sub>3</sub> | - | -Glc(2-1)Glc      | -Glc(6-1Xyl)            | -V | 23 | 20(R)-Rg <sub>2</sub> | -OGlc(2-1)Rha | -H | -H   | -V | 48 | DEDT              | -OH           | -H                | - | V<br>1 |
| 30 | Q-R <sub>1</sub>  | - | -Glc(2-1)Glc(6)Ac | -Glc(6-1)Glc            | -V | 4  | G Re <sub>2</sub>     | -OGlc(3-1)Glc | -H | -Glc | -V | 53 | Rs <sub>4</sub>   | -             | -Glc(2-1)Glc(6)Ac | - | V<br>1 |
| 31 | G Rd              | - | -Glc(2-1)Glc      | -Glc                    | -V | 8  | G Re                  | -OGlc(2-1)Rha | -H | -Glc | -V | 32 | Rk <sub>1</sub>   | -             | -Glc(2-1)Glc      | - | V<br>2 |

|    |                        |   |                   |                 |    |    |                          |               |    |                 |   |    |                 |   |              |   |   |
|----|------------------------|---|-------------------|-----------------|----|----|--------------------------|---------------|----|-----------------|---|----|-----------------|---|--------------|---|---|
| 33 | G Rs <sub>2</sub>      | - | -Glc(2-1)Glc(6)Ac | -Glc(6-1)Ara(f) | -V | 2  | 20-glu-Rf                | -OGlc(2-1)Glc | -H | -Glc            | - | 55 | Rg <sub>5</sub> | - | -Glc(2-1)Glc | - | - |
| 34 | G Rs <sub>1</sub>      | - | -Glc(2-1)Glc(6)Ac | -Glc(6-1)Ara(p) | -V | 6  | G Re <sub>1</sub>        | -O-Glc        | -H | -Glc(3-1)Glc    | - | 37 | DHDGG           | - | -Glc(2-1)Glc | - | V |
| 45 | G F <sub>2</sub>       | - | -Glc              | -Glc            | -V | 1  | G Re <sub>3</sub>        | -O-Glc        | -H | -Glc(4-1)Glc    | - | 60 | Rh <sub>3</sub> | - | -Glc         | - | V |
| 46 | 20-(S)-Rg <sub>3</sub> | - | -Glc(2-1)Glc      | -H              | -V | 3  | G Re <sub>4</sub>        | -O-Glc        | -H | -Glc(6-1)Ara(f) | - | 61 | Rk <sub>2</sub> | - | -Glc         | - | V |
| 47 | 20-(R)-Rg <sub>3</sub> | - | -Glc(2-1)Glc      | -H              | -V | 49 | 20(S)-PPT                | -OH           | -H | -H              | - |    |                 |   |              |   | 2 |
| 51 | 20-(S)-Rs <sub>3</sub> | - | -Glc(2-1)Glc(6)Ac | -H              | -V | 50 | 20(R)-PPT                | -OH           | -H | -H              | - |    |                 |   |              |   |   |
| 52 | 20-(R)-Rs <sub>3</sub> | - | -Glc(2-1)Glc(6)Ac | -H              | -V | 17 | G F <sub>3</sub>         | -OH           | -H | -Glc(6-1)Ara(p) | - |    |                 |   |              |   |   |
| 56 | G-C-K                  | - | -H                | -Glc            | -V | 5  | NG R <sub>1</sub>        | -OGlc(2-1)Xyl | -H | -Glc            | - |    |                 |   |              |   |   |
| 57 | 20-(S)-Rh <sub>2</sub> | - | -Glc              | -H              | -V | 16 | 20-(S)-NG-R <sub>2</sub> | -OGlc(2-1)Xyl | -H | -H              | - |    |                 |   |              |   |   |
| 58 | 20-(R)-Rh <sub>2</sub> | - | -Glc              | -H              | -V | 20 | 20-(R)-NG-R <sub>2</sub> | -OGlc(2-1)Xyl | -H | -H              | - |    |                 |   |              |   |   |
| 62 | 20-(S)-PPD             | - | -H                | -H              | -V | 36 | G RH <sub>19</sub>       | -OH           | -  | -H              | - |    |                 |   |              |   |   |

63      20-(R)-  
PPD      -      -H      -H      -V

---

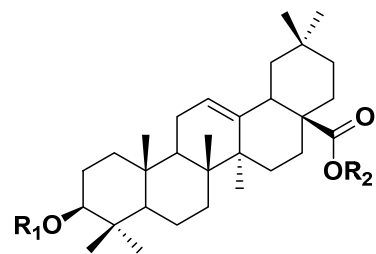

Oleanolic (OA)

| NO. | Compound              | R <sub>1</sub>       | R <sub>2</sub>       |
|-----|-----------------------|----------------------|----------------------|
| 35  | G Ro methyl ester     | -GlcA(6'-OMe,2-1)Glc | -Glc                 |
| 9   | G Ro                  | -GlcA(2-1)Glc        | -Glc                 |
| 41  | CS-Iva methyl ester   | -H                   | -GlcA(6'-OMe,2-1)Glc |
| 54  | ZB-RI-6' methyl ester | -GlcA(6'-OMe,2-1)Glc | -H                   |
| 10  | CS-IV                 | -GlcA(4-1)Ara(f)     | -Glc                 |
| 11  | CS-Iva                | -GlcA                | -Glc                 |
